# Supplementary material
Source: Research Square preprint supplement (doi:10.21203/rs.3.rs-9544425/v1)
Supplement: Supplementary file 1 [file 4928a386ceeca80374c0e2be.xlsx]

## Sheet: Sheet1
OTU	Kingdom	Phylum	Class	Order	Family	Genus	C1	C2	C3	C4	C5	C6	C7	C8	C17	C18	C19
OTU_1	Bacteria	Firmicutes	Clostridia	Lachnospirales	Lachnospiraceae	Tyzzerella	40563	6993	5947	4754	1600	268	5630	5780	9876	11848	11324
OTU_10	Bacteria	Firmicutes	Clostridia	Clostridia_UCG-014	-	-	4981	9270	4807	2846	2021	4526	5871	6325	6609	3863	6285
OTU_100	Bacteria	Patescibacteria	Saccharimonadia	Saccharimonadales	Saccharimonadaceae	Candidatus_Saccharimonas	217	455	486	543	142	356	890	233	221	502	176
OTU_1000	Bacteria	Proteobacteria	Gammaproteobacteria	Xanthomonadales	Xanthomonadaceae	Lysobacter	0	0	0	42	5	0	0	0	0	0	0
OTU_1001	Bacteria	Firmicutes	Bacilli	Alicyclobacillales	Alicyclobacillaceae	Tumebacillus	0	0	0	0	0	5	3	0	0	0	0
OTU_1002	Bacteria	Actinobacteriota	Actinobacteria	Micromonosporales	Micromonosporaceae	Hamadaea	0	27	0	25	0	32	0	0	0	0	0
OTU_1004	Bacteria	Actinobacteriota	Actinobacteria	Corynebacteriales	Nocardiaceae	-	0	0	0	0	0	0	0	0	64	0	0
OTU_1006	Bacteria	Bacteroidota	SJA-28	-	-	-	0	0	0	0	11	0	0	6	19	27	20
OTU_1007	Bacteria	Proteobacteria	Gammaproteobacteria	Burkholderiales	Comamonadaceae	Ramlibacter	0	0	0	0	12	22	12	0	0	0	0
OTU_1009	Bacteria	Proteobacteria	Gammaproteobacteria	Burkholderiales	Alcaligenaceae	Bordetella	0	61	4	0	7	0	0	11	0	0	0
OTU_101	Bacteria	Firmicutes	BRH-c20a	BRH-c20a	BRH-c20a	BRH-c20a	205	1092	1024	3993	81	101	316	1079	3650	2231	1142
OTU_1011	Bacteria	Firmicutes	Clostridia	Oscillospirales	Ruminococcaceae	uncultured	0	9	5	4	0	0	16	8	7	22	11
OTU_1012	Bacteria	Firmicutes	Bacilli	RsaHf231	-	-	0	0	0	0	0	0	30	0	0	14	37
OTU_1013	Bacteria	Actinobacteriota	Actinobacteria	Streptosporangiales	Thermomonosporaceae	Actinocorallia	0	5	0	5	0	70	0	0	0	0	0
OTU_1018	Bacteria	Actinobacteriota	Actinobacteria	Streptosporangiales	Streptosporangiales	Streptosporangiales	0	0	0	78	0	0	0	0	0	0	0
OTU_1019	Bacteria	Myxococcota	Myxococcia	Myxococcales	Vulgatibacteraceae	Vulgatibacter	0	0	0	78	0	0	0	0	0	0	0
OTU_102	Bacteria	Firmicutes	Clostridia	Peptococcales	Peptococcaceae	uncultured	203	1115	135	1553	209	629	195	384	593	407	232
OTU_1020	Bacteria	Bacteroidota	Bacteroidia	Chitinophagales	Chitinophagaceae	Segetibacter	0	0	0	0	5	0	67	6	0	0	0
OTU_1021	Bacteria	Spirochaetota	Spirochaetia	Spirochaetales	Spirochaetaceae	Sediminispirochaeta	0	0	12	0	0	4	0	6	26	0	20
OTU_103	Bacteria	Bacteroidota	Bacteroidia	Bacteroidales	Rs-E47_termite_group	-	203	0	7	0	18	0	0	4	0	39	0
OTU_1030	Bacteria	Actinobacteriota	Actinobacteria	Streptosporangiales	Streptosporangiaceae	Sphaerisporangium	0	0	0	51	0	11	14	0	0	0	0
OTU_1036	Bacteria	Proteobacteria	Alphaproteobacteria	Rhizobiales	Beijerinckiaceae	1174-901-12	0	2	0	0	0	0	6	0	0	0	0
OTU_1037	Bacteria	Patescibacteria	Microgenomatia	Candidatus_Pacebacteria	Candidatus_Pacebacteria	Candidatus_Pacebacteria	0	5	0	0	0	0	0	0	0	4	6
OTU_1038	Bacteria	Actinobacteriota	Actinobacteria	Frankiales	Geodermatophilaceae	Blastococcus	0	0	0	0	0	8	46	0	0	0	0
OTU_104	Bacteria	Firmicutes	Bacilli	RF39	-	-	200	13	7	5	3	4	34	11	0	5	26
OTU_1041	Bacteria	Actinobacteriota	Actinobacteria	Corynebacteriales	Nocardiaceae	Nocardia	0	0	0	0	10	61	0	0	0	0	0
OTU_1042	Bacteria	Verrucomicrobiota	Verrucomicrobiae	Pedosphaerales	Pedosphaeraceae	ADurb.Bin063-1	0	0	0	0	11	28	0	0	0	0	0
OTU_1044	Bacteria	Actinobacteriota	Actinobacteria	Micrococcales	Microbacteriaceae	Gryllotalpicola	0	0	0	0	0	0	0	0	0	47	23
OTU_1045	Bacteria	Chloroflexi	-	-	-	-	0	0	0	0	0	34	0	0	0	0	0
OTU_1046	Bacteria	Verrucomicrobiota	Verrucomicrobiae	Opitutales	Opitutaceae	Diplosphaera	0	0	10	0	0	0	17	7	13	13	9
OTU_1049	Bacteria	Actinobacteriota	Acidimicrobiia	Microtrichales	-	-	0	0	0	0	4	0	50	0	0	0	0
OTU_105	Bacteria	Firmicutes	Clostridia	Oscillospirales	Ruminococcaceae	Ruminococcus	198	625	309	47	213	9	28	176	249	343	58
OTU_1051	Bacteria	Chloroflexi	Ktedonobacteria	Ktedonobacterales	Ktedonobacteraceae	uncultured	0	0	0	8	0	0	0	0	0	0	0
OTU_1054	Bacteria	Actinobacteriota	Actinobacteria	Catenulisporales	Actinospicaceae	Actinospica	0	0	0	0	0	0	0	0	0	4	0
OTU_1057	Bacteria	Verrucomicrobiota	Verrucomicrobiae	Verrucomicrobiales	Verrucomicrobiaceae	-	0	0	12	0	0	0	0	0	0	0	0
OTU_1058	Bacteria	Bacteroidota	Bacteroidia	Bacteroidales	Paludibacteraceae	F0058	0	0	0	0	0	0	0	14	22	15	14
OTU_1059	Bacteria	Firmicutes	Clostridia	uncultured	uncultured	uncultured	0	10	7	26	0	0	10	10	0	0	0
OTU_106	Bacteria	Firmicutes	Syntrophomonadia	Syntrophomonadales	Syntrophomonadaceae	-	197	281	90	232	56	1902	121	100	293	175	231
OTU_1062	Bacteria	Firmicutes	Bacilli	Paenibacillales	Paenibacillaceae	Paenibacillus	0	0	0	32	0	0	0	0	0	0	0
OTU_1063	Bacteria	Proteobacteria	Gammaproteobacteria	Coxiellales	Coxiellaceae	Coxiella	0	0	3	0	0	0	0	0	0	0	0
OTU_1065	Bacteria	Actinobacteriota	-	-	-	-	0	0	0	5	0	11	0	0	0	0	0
OTU_1066	Bacteria	Actinobacteriota	Rubrobacteria	Rubrobacterales	Rubrobacteriaceae	Rubrobacter	0	0	0	0	0	31	0	21	0	0	0
OTU_107	Bacteria	Desulfobacterota	Desulfovibrionia	Desulfovibrionales	Desulfovibrionaceae	uncultured	193	110	29	0	19	0	5	77	129	193	292
OTU_1071	Bacteria	Verrucomicrobiota	Verrucomicrobiae	Pedosphaerales	Pedosphaeraceae	ADurb.Bin063-1	0	13	21	10	0	17	0	0	0	0	0
OTU_1075	Bacteria	Firmicutes	Bacilli	Paenibacillales	Paenibacillaceae	Paenibacillus	0	0	0	0	0	0	0	0	0	0	3
OTU_1076	Bacteria	Actinobacteriota	Actinobacteria	Streptosporangiales	Streptosporangiaceae	Streptosporangium	0	0	0	38	0	14	0	0	0	0	0
OTU_1079	Bacteria	Firmicutes	Desulfitobacteriia	Desulfitobacteriales	Heliobacteriaceae	uncultured	0	2	0	8	0	9	0	0	0	0	0
OTU_1080	Bacteria	Firmicutes	Clostridia	Lachnospirales	Lachnospiraceae	Lachnoclostridium	0	0	4	0	20	15	0	0	0	0	0
OTU_1082	Bacteria	Chloroflexi	Ktedonobacteria	Ktedonobacterales	Ktedonobacteraceae	1959-1	0	0	14	21	6	15	0	0	0	0	0
OTU_1084	Bacteria	Sumerlaeota	Sumerlaeia	Sumerlaeales	Sumerlaeaceae	Sumerlaea	0	0	0	56	0	0	0	0	0	0	0
OTU_1086	Bacteria	Proteobacteria	Alphaproteobacteria	Rhizobiales	Beijerinckiaceae	Psychroglaciecola	0	0	0	0	16	0	39	0	0	0	0
OTU_1089	Bacteria	Firmicutes	Clostridia	Oscillospirales	Ruminococcaceae	uncultured	0	0	4	0	0	0	3	0	3	0	0
OTU_109	Bacteria	Patescibacteria	Gracilibacteria	JGI_0000069-P22	-	-	191	16	0	0	0	0	23	0	32	16	32
OTU_1090	Bacteria	Chloroflexi	Chloroflexia	Thermomicrobiales	JG30-KF-CM45	-	0	2	0	5	0	23	0	0	0	0	0
OTU_1091	Bacteria	Planctomycetota	Planctomycetes	Pirellulales	Pirellulaceae	Pir4_lineage	0	0	0	50	0	0	0	4	0	0	0
OTU_1092	Bacteria	Proteobacteria	Alphaproteobacteria	Elsterales	uncultured	uncultured	0	0	0	0	4	0	0	0	0	0	0
OTU_1098	Bacteria	Firmicutes	Bacilli	Paenibacillales	Paenibacillaceae	Ammoniphilus	0	0	0	0	0	0	27	0	0	0	0
OTU_1099	Bacteria	Firmicutes	Bacilli	Thermoactinomycetales	Thermoactinomycetaceae	uncultured	0	0	0	0	0	5	0	0	0	0	0
OTU_11	Bacteria	Firmicutes	Bacilli	Lactobacillales	Streptococcaceae	Lactococcus	3416	2397	0	43	27932	0	0	5696	0	0	0
OTU_110	Bacteria	Firmicutes	Clostridia	Oscillospirales	Ruminococcaceae	uncultured	185	978	139	964	611	249	565	332	124	586	329
OTU_1100	Bacteria	Proteobacteria	Alphaproteobacteria	Rhizobiales	Methyloligellaceae	uncultured	0	0	0	7	0	6	0	0	0	0	0
OTU_1101	Bacteria	Firmicutes	Bacilli	Paenibacillales	Paenibacillaceae	Paenibacillus	0	6	7	13	3	14	8	0	0	0	0
OTU_1104	Bacteria	Actinobacteriota	Actinobacteria	Propionibacteriales	Propionibacteriaceae	Aestuariimicrobium	0	0	0	0	5	0	0	0	0	0	0
OTU_1105	Bacteria	Firmicutes	Negativicutes	Veillonellales-Selenomonadales	Sporomusaceae	uncultured	0	0	0	8	0	0	0	0	0	0	0
OTU_1108	Bacteria	Actinobacteriota	Actinobacteria	Micrococcales	Dermacoccaceae	Flexivirga	0	0	0	11	0	0	0	0	0	0	0
OTU_1109	Bacteria	Patescibacteria	-	-	-	-	0	4	0	8	0	0	0	0	0	0	0
OTU_111	Bacteria	Patescibacteria	Saccharimonadia	Saccharimonadales	-	-	182	1005	692	157	200	329	408	657	173	244	210
OTU_1111	Bacteria	Firmicutes	Bacilli	RF39	-	-	0	0	0	0	0	2	0	0	0	0	6
OTU_1113	Bacteria	Actinobacteriota	Actinobacteria	Micromonosporales	Micromonosporaceae	Luedemannella	0	0	0	6	0	42	0	0	0	0	0
OTU_1114	Bacteria	Verrucomicrobiota	Verrucomicrobiae	Chthoniobacterales	Chthoniobacteraceae	Candidatus_Udaeobacter	0	0	48	0	0	0	0	0	0	0	0
OTU_1116	Bacteria	Actinobacteriota	Actinobacteria	Micromonosporales	Micromonosporaceae	Stackebrandtia	0	0	0	13	0	0	34	0	0	0	0
OTU_1117	Bacteria	Myxococcota	Myxococcia	Myxococcales	Anaeromyxobacteraceae	Anaeromyxobacter	0	0	0	6	0	11	0	2	0	0	0
OTU_1118	Bacteria	Chloroflexi	Ktedonobacteria	Ktedonobacterales	Ktedonobacteraceae	G12-WMSP1	0	0	0	0	0	47	0	0	0	0	0
OTU_112	Bacteria	Firmicutes	Clostridia	Oscillospirales	Ruminococcaceae	Ruminococcaceae	178	917	0	218	47	201	9	820	74	2170	0
OTU_1120	Bacteria	Proteobacteria	Alphaproteobacteria	Rhodospirillales	uncultured	uncultured	0	0	4	0	0	0	0	0	0	5	10
OTU_1121	Bacteria	Actinobacteriota	Actinobacteria	Pseudonocardiales	Pseudonocardiaceae	Actinophytocola	0	0	0	0	0	0	22	25	0	0	0
OTU_1122	Bacteria	Chloroflexi	Ktedonobacteria	Ktedonobacterales	JG30-KF-AS9	-	0	0	0	0	0	6	0	0	0	0	0
OTU_1124	Bacteria	Proteobacteria	Alphaproteobacteria	Rhizobiales	Xanthobacteraceae	Rhodoplanes	0	0	12	13	0	21	0	0	0	0	0
OTU_1125	Bacteria	Firmicutes	Bacilli	Lactobacillales	Streptococcaceae	Lactococcus	0	0	0	46	0	0	0	0	0	0	0
OTU_1127	Bacteria	Firmicutes	Bacilli	Thermoactinomycetales	Thermoactinomycetaceae	uncultured	0	0	0	3	0	0	0	0	0	0	0
OTU_1128	Bacteria	Verrucomicrobiota	Verrucomicrobiae	LD1-PB3	LD1-PB3	LD1-PB3	0	0	6	26	14	0	0	0	0	0	0
OTU_1129	Bacteria	Firmicutes	Desulfitobacteriia	Desulfitobacteriales	Desulfitobacteriaceae	Desulfitobacterium	0	0	0	0	0	0	3	0	0	0	0
OTU_113	Bacteria	Firmicutes	Desulfitobacteriia	Desulfitobacteriales	Desulfitobacteriaceae	Desulfosporosinus	177	49	73	0	6	86	90	136	198	296	199
OTU_1133	Bacteria	Bacteroidota	Bacteroidia	Bacteroidales	Tannerellaceae	Candidatus_Vestibaculum	0	0	0	44	0	0	0	0	0	0	0
OTU_1134	Bacteria	Planctomycetota	Planctomycetes	Isosphaerales	Isosphaeraceae	Singulisphaera	0	0	0	30	0	0	0	0	0	0	0
OTU_1143	Bacteria	Bdellovibrionota	Oligoflexia	0319-6G20	-	-	0	0	6	0	2	0	0	0	0	0	0
OTU_1145	Bacteria	Bacteroidota	Bacteroidia	Cytophagales	Microscillaceae	Ohtaekwangia	0	0	0	0	5	0	0	0	0	0	0
OTU_1149	Bacteria	Proteobacteria	Alphaproteobacteria	Paracaedibacterales	Paracaedibacteraceae	uncultured	0	0	0	0	0	0	6	21	0	0	0
OTU_115	Bacteria	Firmicutes	Clostridia	Oscillospirales	[Eubacterium]_coprostanoligenes_group	[Eubacterium]_coprostanoligenes_group	175	371	144	55	155	249	202	223	217	241	252
OTU_1155	Bacteria	Chloroflexi	Gitt-GS-136	-	-	-	0	4	2	2	0	0	3	0	0	0	0
OTU_1156	Bacteria	Bacteroidota	Bacteroidia	Sphingobacteriales	Sphingobacteriaceae	Mucilaginibacter	0	0	0	0	2	0	0	0	0	0	0
OTU_1157	Bacteria	Firmicutes	uncultured	uncultured	uncultured	uncultured	0	0	7	0	0	0	7	11	5	0	9
OTU_1159	Bacteria	Actinobacteriota	Actinobacteria	Micrococcales	Intrasporangiaceae	Phycicoccus	0	0	4	0	18	0	0	6	0	11	0
OTU_116	Bacteria	Firmicutes	Clostridia	Oscillospirales	[Eubacterium]_coprostanoligenes_group	[Eubacterium]_coprostanoligenes_group	173	431	338	96	122	1041	464	197	323	186	252
OTU_1164	Bacteria	Firmicutes	Bacilli	Paenibacillales	Paenibacillaceae	Paenibacillus	0	0	0	20	0	0	0	0	0	0	0
OTU_1165	Bacteria	Actinobacteriota	Actinobacteria	Propionibacteriales	Nocardioidaceae	Nocardioides	0	0	0	38	0	0	0	0	0	0	0
OTU_1166	Bacteria	Actinobacteriota	Rubrobacteria	Rubrobacterales	Rubrobacteriaceae	Rubrobacter	0	0	0	0	19	0	19	0	0	0	0
OTU_1167	Bacteria	Proteobacteria	Alphaproteobacteria	Rhizobiales	Xanthobacteraceae	Rhodopseudomonas	0	0	0	6	4	0	0	0	0	0	0
OTU_1169	Bacteria	Actinobacteriota	Actinobacteria	Propionibacteriales	Nocardioidaceae	Mumia	0	0	0	37	0	0	0	0	0	0	0
OTU_117	Bacteria	Firmicutes	Clostridia	Peptostreptococcales-Tissierellales	Anaerovoracaceae	Anaerovorax	166	134	61	9	21	9	203	22	208	98	212
OTU_1171	Bacteria	Actinobacteriota	Actinobacteria	Propionibacteriales	Nocardioidaceae	Nocardioides	0	0	0	19	0	18	0	0	0	0	0
OTU_1172	Bacteria	Firmicutes	Clostridia	Clostridia_vadinBB60_group	Clostridia_vadinBB60_group	Clostridia_vadinBB60_group	0	0	0	0	0	0	2	0	0	0	0
OTU_1173	Bacteria	Actinobacteriota	Actinobacteria	Corynebacteriales	Nocardiaceae	Nocardia	0	0	0	14	0	0	12	0	0	11	0
OTU_1174	Bacteria	Actinobacteriota	Thermoleophilia	Gaiellales	uncultured	uncultured	0	0	0	0	10	27	0	0	0	0	0
OTU_1177	Bacteria	Firmicutes	Clostridia	Oscillospirales	Oscillospiraceae	Papillibacter	0	3	0	0	0	0	0	0	3	0	0
OTU_1178	Bacteria	Firmicutes	Clostridia	Oscillospirales	UCG-010	-	0	14	0	0	0	0	0	0	0	22	0
OTU_1179	Bacteria	Firmicutes	Negativicutes	Acidaminococcales	Acidaminococcaceae	uncultured	0	0	0	36	0	0	0	0	0	0	0
OTU_118	Bacteria	Bacteroidota	Bacteroidia	Bacteroidales	Rikenellaceae	M2PB4-61_termite_group	163	159	16	0	38	99	158	218	40	139	491
OTU_1180	Bacteria	Firmicutes	Clostridia	Lachnospirales	Lachnospiraceae	Lachnoclostridium	0	11	0	6	0	0	0	19	0	0	0
OTU_1184	Bacteria	Actinobacteriota	Actinobacteria	Propionibacteriales	Nocardioidaceae	Marmoricola	0	19	0	16	0	0	0	0	0	0	0
OTU_1185	Bacteria	Proteobacteria	Alphaproteobacteria	Rhizobiales	-	-	0	0	0	0	10	0	0	0	0	0	0
OTU_1187	Bacteria	Firmicutes	Clostridia	Lachnospirales	Lachnospiraceae	Cellulosilyticum	0	0	0	0	0	0	6	0	0	0	0
OTU_119	Bacteria	Firmicutes	Negativicutes	Veillonellales-Selenomonadales	Sporomusaceae	-	149	1558	1241	317	175	87	247	421	846	755	303
OTU_1191	Bacteria	Firmicutes	Clostridia	Lachnospirales	Lachnospiraceae	uncultured	0	0	0	0	0	0	11	0	0	2	5
OTU_1196	Bacteria	Verrucomicrobiota	Verrucomicrobiae	Chthoniobacterales	Xiphinematobacteraceae	Candidatus_Xiphinematobacter	0	0	0	0	6	0	0	0	0	0	0
OTU_1197	Bacteria	Firmicutes	Clostridia	Christensenellales	Christensenellaceae	uncultured	0	0	0	0	0	33	0	0	0	0	0
OTU_1199	Bacteria	Firmicutes	Clostridia	Oscillospirales	Ruminococcaceae	uncultured	0	0	0	0	0	3	0	0	0	0	0
OTU_12	Bacteria	Spirochaetota	Spirochaetia	Spirochaetales	Spirochaetaceae	Treponema	3379	2543	3492	364	1020	468	4330	4801	5542	12988	13917
OTU_120	Bacteria	Firmicutes	Clostridia	Clostridia	Hungateiclostridiaceae	-	145	744	269	667	93	2367	677	193	331	318	705
OTU_1200	Bacteria	Actinobacteriota	Actinobacteria	Micrococcales	Micrococcaceae	Sinomonas	0	0	0	0	0	32	0	0	0	0	0
OTU_1202	Bacteria	Myxococcota	Polyangia	Polyangiales	Polyangiaceae	Pajaroellobacter	0	0	6	3	0	18	0	0	0	0	0
OTU_1204	Bacteria	Actinobacteriota	Actinobacteria	Frankiales	Geodermatophilaceae	Modestobacter	0	0	0	0	0	0	26	0	0	0	0
OTU_1206	Bacteria	SAR324_clade(Marine_group_B)	SAR324_clade(Marine_group_B)	SAR324_clade(Marine_group_B)	SAR324_clade(Marine_group_B)	-	0	0	0	0	2	0	0	0	0	0	0
OTU_1207	Bacteria	Actinobacteriota	Thermoleophilia	Solirubrobacterales	Solirubrobacteraceae	JCM_18997	0	0	0	21	10	0	0	0	0	0	0
OTU_1208	Bacteria	Actinobacteriota	Actinobacteria	Micrococcales	Micrococcaceae	Tersicoccus	0	0	0	0	0	0	18	0	0	0	13
OTU_1209	Bacteria	Firmicutes	Bacilli	Paenibacillales	Paenibacillaceae	Paenibacillus	0	0	0	31	0	0	0	0	0	0	0
OTU_121	Bacteria	Firmicutes	Clostridia	Peptostreptococcales-Tissierellales	Anaerovoracaceae	uncultured	142	180	40	0	80	0	60	25	48	31	14
OTU_1210	Bacteria	Firmicutes	Bacilli	Thermoactinomycetales	Thermoactinomycetaceae	Seinonella	0	20	0	0	0	10	0	0	0	0	0
OTU_1212	Bacteria	Myxococcota	Polyangia	Polyangiales	Phaselicystidaceae	Phaselicystis	0	0	0	0	2	15	0	0	0	0	0
OTU_1213	Bacteria	Bacteroidota	Bacteroidia	Chitinophagales	Chitinophagaceae	Haoranjiania	0	27	0	0	3	0	0	0	0	0	0
OTU_1216	Bacteria	Acidobacteriota	Vicinamibacteria	Vicinamibacterales	Vicinamibacteraceae	Vicinamibacter	0	0	6	0	17	7	0	0	0	0	0
OTU_1217	Bacteria	Actinobacteriota	Actinobacteria	Pseudonocardiales	Pseudonocardiaceae	Pseudonocardiaceae	0	0	0	0	0	0	9	20	0	0	0
OTU_1219	Bacteria	Planctomycetota	Planctomycetes	Planctomycetales	Rubinisphaeraceae	SH-PL14	0	0	4	0	20	0	0	5	0	0	0
OTU_122	Bacteria	Firmicutes	Clostridia	Clostridia_UCG-014	-	-	139	52	87	15	30	113	38	41	199	51	72
OTU_1221	Bacteria	Firmicutes	Bacilli	Entomoplasmatales	type_III	type_III	0	0	0	0	5	0	0	0	0	0	0
OTU_1223	Bacteria	Myxococcota	Myxococcia	Myxococcales	Anaeromyxobacteraceae	Anaeromyxobacter	0	0	0	0	0	4	0	0	0	0	0
OTU_1225	Bacteria	Firmicutes	Bacilli	Acholeplasmatales	Acholeplasmataceae	Acholeplasma	0	0	0	0	0	0	0	0	0	11	0
OTU_1226	Bacteria	Proteobacteria	Gammaproteobacteria	Burkholderiales	Oxalobacteraceae	Oxalobacter	0	0	0	0	0	0	14	0	0	0	0
OTU_1227	Bacteria	Actinobacteriota	Thermoleophilia	Solirubrobacterales	-	-	0	0	0	0	0	0	28	0	0	0	0
OTU_123	Bacteria	Actinobacteriota	Actinobacteria	Propionibacteriales	Nocardioidaceae	Nocardioides	138	3454	3120	8500	7084	11543	26232	3894	8373	4181	313
OTU_1230	Bacteria	Myxococcota	Polyangia	Polyangiales	BIrii41	-	0	2	0	0	9	9	0	2	0	0	0
OTU_1231	Bacteria	Planctomycetota	Planctomycetes	Pirellulales	Pirellulaceae	uncultured	0	9	0	0	0	0	0	0	0	0	0
OTU_1232	Bacteria	Actinobacteriota	Coriobacteriia	Coriobacteriales	Coriobacteriales_Incertae_Sedis	Raoultibacter	0	0	0	0	5	0	0	0	8	0	15
OTU_1233	Bacteria	Actinobacteriota	Actinobacteria	Pseudonocardiales	Pseudonocardiaceae	Kutzneria	0	0	0	0	0	24	0	0	0	0	0
OTU_1234	Bacteria	Firmicutes	Bacilli	Paenibacillales	Paenibacillaceae	Paenibacillus	0	0	0	27	0	0	0	0	0	0	0
OTU_1236	Bacteria	Sumerlaeota	Sumerlaeia	Sumerlaeales	Sumerlaeaceae	Sumerlaea	0	0	0	13	0	0	14	0	0	0	0
OTU_1237	Bacteria	Firmicutes	Negativicutes	Veillonellales-Selenomonadales	Sporomusaceae	Sporomusa	0	0	0	0	0	0	0	5	0	0	22
OTU_1238	Bacteria	Spirochaetota	Spirochaetia	Spirochaetales	Spirochaetaceae	uncultured	0	0	0	4	0	0	0	0	0	0	23
OTU_1239	Bacteria	Chloroflexi	Dehalococcoidia	S085	-	-	0	0	0	7	0	6	0	0	0	0	0
OTU_124	Bacteria	Proteobacteria	Gammaproteobacteria	Coxiellales	Coxiellaceae	Coxiella	137	5	6	0	26	11	105	13	0	0	0
OTU_1240	Bacteria	Actinobacteriota	Thermoleophilia	Solirubrobacterales	Solirubrobacteraceae	Patulibacter	0	0	0	0	4	0	0	0	0	0	0
OTU_1242	Bacteria	Chloroflexi	KD4-96	-	-	-	0	0	0	5	9	13	0	0	0	0	0
OTU_1243	Bacteria	Verrucomicrobiota	Chlamydiae	Chlamydiales	Chlamydiaceae	-	0	0	8	0	10	0	0	0	0	0	0
OTU_1244	Bacteria	Bacteroidota	Bacteroidia	Bacteroidales	COB_P4-1_termite_group	COB_P4-1_termite_group	0	9	0	0	6	0	0	12	0	0	0
OTU_1246	Bacteria	Actinobacteriota	Thermoleophilia	Solirubrobacterales	-	-	0	0	0	0	0	17	9	0	0	0	0
OTU_1247	Bacteria	Firmicutes	Clostridia	Lachnospirales	Lachnospiraceae	Herbinix	0	0	0	0	7	0	0	0	0	0	0
OTU_125	Bacteria	Patescibacteria	Gracilibacteria	Absconditabacteriales_(SR1)	Absconditabacteriales_(SR1)	Absconditabacteriales_(SR1)	133	513	2242	10	297	541	752	736	800	1626	1974
OTU_1250	Bacteria	Planctomycetota	-	-	-	-	0	0	0	3	0	0	0	0	0	0	0
OTU_1251	Bacteria	Actinobacteriota	MB-A2-108	-	-	-	0	0	0	0	0	20	0	0	0	0	0
OTU_1252	Bacteria	Bacteroidota	Bacteroidia	Bacteroidales	Prolixibacteraceae	uncultured	0	0	0	0	0	26	0	0	0	0	0
OTU_1254	Bacteria	Actinobacteriota	Actinobacteria	Propionibacteriales	Nocardioidaceae	Nocardioides	0	0	0	0	22	0	0	0	0	0	0
OTU_1256	Bacteria	Myxococcota	Myxococcia	Myxococcales	Myxococcaceae	uncultured	0	0	0	0	5	0	0	0	0	0	0
OTU_1259	Bacteria	Actinobacteriota	Actinobacteria	Micrococcales	Microbacteriaceae	Amnibacterium	0	0	0	0	9	0	0	16	0	0	0
OTU_126	Bacteria	Firmicutes	Syntrophomonadia	Syntrophomonadales	Syntrophomonadaceae	Pelospora	132	12	0	0	0	5	0	0	0	0	0
OTU_1268	Bacteria	Proteobacteria	Gammaproteobacteria	Steroidobacterales	Steroidobacteraceae	Steroidobacter	0	0	5	9	4	7	0	0	0	0	0
OTU_1269	Bacteria	Firmicutes	Clostridia	Lachnospirales	Lachnospiraceae	Lachnoclostridium	0	15	0	0	0	0	0	0	7	0	0
OTU_127	Bacteria	Firmicutes	Clostridia	Lachnospirales	Lachnospiraceae	Tyzzerella	128	671	347	268	109	1464	522	234	624	488	617
OTU_1270	Bacteria	Verrucomicrobiota	Chlamydiae	Chlamydiales	Parachlamydiaceae	uncultured	0	3	0	0	0	0	0	0	0	0	0
OTU_1273	Bacteria	Chloroflexi	Chloroflexia	Thermomicrobiales	JG30-KF-CM45	-	0	0	0	16	0	0	0	0	0	0	0
OTU_1275	Bacteria	Proteobacteria	Alphaproteobacteria	Elsterales	URHD0088	-	0	0	0	0	3	8	0	0	0	0	0
OTU_128	Bacteria	Elusimicrobiota	Endomicrobia	Endomicrobiales	Endomicrobiaceae	Endomicrobium	128	116	134	0	35	150	1363	199	168	277	139
OTU_1284	Bacteria	Actinobacteriota	Actinobacteria	Pseudonocardiales	Pseudonocardiaceae	Sciscionella	0	0	0	23	0	0	0	0	0	0	0
OTU_1287	Bacteria	Verrucomicrobiota	Verrucomicrobiae	Chthoniobacterales	Chthoniobacteraceae	Candidatus_Udaeobacter	0	12	0	0	0	0	0	11	0	0	0
OTU_1288	Bacteria	Actinobacteriota	Coriobacteriia	OPB41	-	-	0	0	0	0	0	19	0	0	0	0	0
OTU_129	Bacteria	Patescibacteria	Gracilibacteria	Absconditabacteriales_(SR1)	Absconditabacteriales_(SR1)	Absconditabacteriales_(SR1)	128	71	505	35	196	17	130	0	0	0	145
OTU_1290	Bacteria	Chloroflexi	Chloroflexia	Thermomicrobiales	JG30-KF-CM45	-	0	0	0	0	0	23	0	0	0	0	0
OTU_1292	Bacteria	Firmicutes	Bacilli	Paenibacillales	Paenibacillaceae	Paenibacillus	0	0	0	0	0	5	0	0	0	0	0
OTU_1297	Bacteria	Chloroflexi	Ktedonobacteria	Ktedonobacterales	Ktedonobacteraceae	uncultured	0	0	0	0	0	0	0	0	0	3	0
OTU_1298	Bacteria	Proteobacteria	Alphaproteobacteria	Sphingomonadales	Sphingomonadaceae	Altererythrobacter	0	0	0	0	10	0	9	3	0	0	0
OTU_1299	Bacteria	Planctomycetota	Planctomycetes	Pirellulales	Pirellulaceae	Pirellula	0	0	19	0	0	0	3	0	0	0	0
OTU_13	Bacteria	Firmicutes	Clostridia	Lachnospirales	Lachnospiraceae	Tyzzerella	3341	4895	1160	2750	1105	10547	2194	1581	1787	2646	2979
OTU_130	Bacteria	Spirochaetota	Leptospirae	Leptospirales	Leptospiraceae	RBG-16-49-21	122	729	226	192	70	0	0	57	0	0	0
OTU_1300	Bacteria	Firmicutes	Clostridia	Oscillospirales	Ruminococcaceae	CAG-352	0	7	0	0	0	0	0	0	11	0	0
OTU_1301	Bacteria	Actinobacteriota	Actinobacteria	Kineosporiales	Kineosporiaceae	Quadrisphaera	0	22	0	0	0	0	0	0	0	0	0
OTU_1306	Bacteria	Firmicutes	Bacilli	Paenibacillales	Paenibacillaceae	Paenibacillus	0	0	0	21	0	0	0	0	0	0	0
OTU_1309	Bacteria	Actinobacteriota	Actinobacteria	Propionibacteriales	Nocardioidaceae	Nocardioides	0	0	0	21	0	0	0	0	0	0	0
OTU_131	Bacteria	Firmicutes	Clostridia	Oscillospirales	UCG-010	-	118	607	15	160	160	238	265	168	159	79	44
OTU_1310	Bacteria	Myxococcota	Polyangia	Polyangiales	Sandaracinaceae	uncultured	0	0	0	7	5	9	0	0	0	0	0
OTU_1312	Bacteria	Proteobacteria	Alphaproteobacteria	Rhizobiales	Beijerinckiaceae	Methylobacterium-Methylorubrum	0	0	0	0	16	0	0	5	0	0	0
OTU_1313	Bacteria	Firmicutes	Bacilli	Bacillales	Bacillaceae	Bacillus	0	0	0	0	0	0	21	0	0	0	0
OTU_1314	Bacteria	Chloroflexi	Chloroflexia	Thermomicrobiales	JG30-KF-CM45	-	0	0	0	5	7	9	0	0	0	0	0
OTU_1316	Bacteria	Planctomycetota	Planctomycetes	Gemmatales	Gemmataceae	Fimbriiglobus	0	0	9	7	0	5	0	0	0	0	0
OTU_1317	Bacteria	Chloroflexi	TK10	-	-	-	0	0	0	0	0	0	0	0	2	0	0
OTU_1318	Bacteria	Desulfobacterota	Desulfobacteria	Desulfatiglandales	Desulfatiglandaceae	Desulfatiglans	0	0	0	0	0	0	0	2	0	0	18
OTU_1319	Bacteria	Myxococcota	Myxococcia	Myxococcales	Myxococcaceae	uncultured	0	5	0	0	0	0	0	0	0	0	0
OTU_132	Bacteria	Proteobacteria	Gammaproteobacteria	Burkholderiales	-	-	116	81	109	62	15	78	53	196	814	307	390
OTU_1320	Bacteria	Nitrospirota	Nitrospiria	Nitrospirales	Nitrospiraceae	Nitrospira	0	2	5	7	0	0	3	0	0	0	0
OTU_1321	Bacteria	Actinobacteriota	Actinobacteria	Propionibacteriales	Propionibacteriaceae	Aestuariimicrobium	0	0	0	0	0	15	5	0	0	0	0
OTU_1323	Bacteria	Chloroflexi	Gitt-GS-136	-	-	-	0	0	0	0	17	3	0	0	0	0	0
OTU_1326	Bacteria	Proteobacteria	Alphaproteobacteria	Rhizobiales	Xanthobacteraceae	Afipia	0	0	0	20	0	0	0	0	0	0	0
OTU_1328	Bacteria	Actinobacteriota	Actinobacteria	Streptosporangiales	Streptosporangiaceae	Microtetraspora	0	0	0	0	0	0	5	0	0	0	0
OTU_1329	Bacteria	Acidobacteriota	Blastocatellia	Blastocatellales	Blastocatellaceae	uncultured	0	0	19	0	0	0	0	0	0	0	0
OTU_133	Bacteria	Planctomycetota	Planctomycetes	Pirellulales	Pirellulaceae	Termite_planctomycete_cluster	115	1407	3318	405	28	1562	213	245	0	307	185
OTU_1330	Bacteria	Gemmatimonadota	Gemmatimonadetes	Gemmatimonadales	Gemmatimonadaceae	Gemmatimonas	0	0	0	5	7	7	0	0	0	0	0
OTU_1331	Bacteria	Bacteroidota	Bacteroidia	Cytophagales	Cytophagaceae	Sporocytophaga	0	0	0	0	8	0	2	6	0	0	0
OTU_1333	Bacteria	Cyanobacteria	Sericytochromatia	Sericytochromatia	Sericytochromatia	Sericytochromatia	0	2	10	0	0	7	0	0	0	0	0
OTU_1335	Bacteria	Chloroflexi	Ktedonobacteria	Ktedonobacterales	Ktedonobacteraceae	FCPS473	0	0	0	0	0	0	0	0	0	3	0
OTU_1336	Bacteria	Chloroflexi	Ktedonobacteria	Ktedonobacterales	Ktedonobacteraceae	1959-1	0	0	0	10	0	6	0	0	3	0	0
OTU_1337	Bacteria	Actinobacteriota	Actinobacteria	Frankiales	Frankiaceae	Jatrophihabitans	0	0	0	0	0	19	0	0	0	0	0
OTU_134	Bacteria	Firmicutes	Clostridia	Clostridia_UCG-014	-	-	112	607	90	208	77	487	190	289	245	283	362
OTU_1345	Bacteria	Proteobacteria	Gammaproteobacteria	Burkholderiales	Burkholderiaceae	Cupriavidus	0	0	18	0	0	0	0	0	0	0	0
OTU_1346	Bacteria	Acidobacteriota	Holophagae	Subgroup_7	Subgroup_7	Subgroup_7	0	0	4	0	5	9	0	0	0	0	0
OTU_1347	Bacteria	Firmicutes	Bacilli	Izemoplasmatales	Izemoplasmatales	Izemoplasmatales	0	0	0	0	18	0	0	0	0	0	0
OTU_1348	Bacteria	Actinobacteriota	Rubrobacteria	Rubrobacterales	Rubrobacteriaceae	Rubrobacter	0	0	0	0	0	18	0	0	0	0	0
OTU_1349	Bacteria	Proteobacteria	Alphaproteobacteria	Sphingomonadales	Sphingomonadaceae	Novosphingobium	0	0	0	0	9	7	2	0	0	0	0
OTU_135	Bacteria	Firmicutes	Bacilli	RsaHf231	-	-	111	156	547	66	1676	15	1887	140	72	59	118
OTU_1351	Bacteria	Planctomycetota	Planctomycetes	Gemmatales	Gemmataceae	uncultured	0	0	0	0	6	7	0	0	0	0	0
OTU_1352	Bacteria	Planctomycetota	Planctomycetes	Gemmatales	Gemmataceae	Fimbriiglobus	0	0	0	0	5	3	0	3	0	0	0
OTU_1354	Bacteria	Proteobacteria	Gammaproteobacteria	Burkholderiales	Burkholderiaceae	uncultured	0	0	0	17	0	0	0	0	0	0	0
OTU_1356	Bacteria	Planctomycetota	Planctomycetes	Gemmatales	Gemmataceae	Gemmata	0	0	0	3	0	14	0	0	0	0	0
OTU_136	Bacteria	Firmicutes	Clostridia	Clostridia_vadinBB60_group	Clostridia_vadinBB60_group	Clostridia_vadinBB60_group	110	69	58	297	28	11	264	223	88	83	165
OTU_1360	Bacteria	Myxococcota	Myxococcia	Myxococcales	Vulgatibacteraceae	Vulgatibacter	0	0	0	13	0	4	0	0	0	0	0
OTU_1362	Bacteria	Actinobacteriota	Actinobacteria	Propionibacteriales	Nocardioidaceae	Flindersiella	0	12	0	0	0	5	0	0	0	0	0
OTU_1363	Bacteria	Planctomycetota	Planctomycetes	uncultured	uncultured	uncultured	0	0	3	0	7	7	0	0	0	0	0
OTU_1364	Bacteria	FCPU426	FCPU426	FCPU426	FCPU426	FCPU426	0	0	17	0	0	0	0	0	0	0	0
OTU_1365	Bacteria	Planctomycetota	Planctomycetes	Gemmatales	Gemmataceae	Zavarzinella	0	0	17	0	0	0	0	0	0	0	0
OTU_1366	Bacteria	Firmicutes	Clostridia	Oscillospirales	Ruminococcaceae	Ruminococcaceae	0	0	0	0	3	0	2	0	7	5	0
OTU_1367	Bacteria	Actinobacteriota	Thermoleophilia	Solirubrobacterales	Solirubrobacteraceae	Solirubrobacter	0	17	0	0	0	0	0	0	0	0	0
OTU_1368	Bacteria	Actinobacteriota	Acidimicrobiia	Microtrichales	Ilumatobacteraceae	uncultured	0	5	0	0	11	0	0	0	0	0	0
OTU_1369	Bacteria	Firmicutes	Clostridia	Lachnospirales	-	-	0	0	0	0	0	0	3	0	0	0	0
OTU_137	Bacteria	Bacteroidota	Bacteroidia	Bacteroidales	Rs-E47_termite_group	-	109	0	9	0	0	0	0	0	9	0	7
OTU_1371	Bacteria	Actinobacteriota	Thermoleophilia	Gaiellales	Gaiellaceae	Gaiella	0	0	5	11	0	0	0	0	0	0	0
OTU_1372	Bacteria	Planctomycetota	Phycisphaerae	Tepidisphaerales	Tepidisphaeraceae	Tepidisphaeraceae	0	0	0	0	0	0	13	3	0	0	0
OTU_1373	Bacteria	Actinobacteriota	Actinobacteria	Streptosporangiales	Streptosporangiaceae	Sphaerisporangium	0	0	0	0	0	16	0	0	0	0	0
OTU_1374	Bacteria	Actinobacteriota	Actinobacteria	Streptosporangiales	Thermomonosporaceae	Actinoallomurus	0	0	0	0	0	11	5	0	0	0	0
OTU_1376	Bacteria	Chloroflexi	TK10	-	-	-	0	0	0	0	8	8	0	0	0	0	0
OTU_138	Bacteria	Firmicutes	Clostridia	Monoglobales	Monoglobaceae	Monoglobus	108	829	108	229	24	259	389	184	317	172	279
OTU_1382	Bacteria	Actinobacteriota	Actinobacteria	Pseudonocardiales	Pseudonocardiaceae	Longimycelium	0	0	7	0	0	0	8	0	0	0	0
OTU_1383	Bacteria	Planctomycetota	Planctomycetes	Gemmatales	Gemmataceae	uncultured	0	0	9	0	0	6	0	0	0	0	0
OTU_1385	Bacteria	Proteobacteria	Alphaproteobacteria	Sphingomonadales	Sphingomonadaceae	Porphyrobacter	0	0	9	0	0	0	0	0	0	0	0
OTU_1386	Bacteria	Firmicutes	Clostridia	Clostridia_vadinBB60_group	Clostridia_vadinBB60_group	Clostridia_vadinBB60_group	0	0	0	0	0	0	0	0	15	0	0
OTU_1387	Bacteria	Firmicutes	Desulfitobacteriia	Desulfitobacteriales	Desulfitobacteriales	TC1	0	0	15	0	0	0	0	0	0	0	0
OTU_1388	Bacteria	Gemmatimonadota	Gemmatimonadetes	Gemmatimonadales	Gemmatimonadaceae	uncultured	0	0	0	0	0	13	0	0	0	0	0
OTU_1389	Bacteria	Planctomycetota	Phycisphaerae	Tepidisphaerales	WD2101_soil_group	-	0	0	15	0	0	0	0	0	0	0	0
OTU_139	Bacteria	Firmicutes	Bacilli	Acholeplasmatales	Acholeplasmataceae	Anaeroplasma	103	0	0	0	0	0	0	0	0	0	0
OTU_1394	Bacteria	Planctomycetota	Planctomycetes	Isosphaerales	Isosphaeraceae	Singulisphaera	0	0	0	7	0	0	0	0	0	0	0
OTU_1396	Bacteria	Actinobacteriota	Actinobacteria	Micromonosporales	Micromonosporaceae	Plantactinospora	0	0	0	0	0	0	15	0	0	0	0
OTU_1397	Bacteria	Actinobacteriota	Thermoleophilia	Solirubrobacterales	Solirubrobacteraceae	Conexibacter	0	0	0	0	7	8	0	0	0	0	0
OTU_1399	Bacteria	Firmicutes	Clostridia	Peptostreptococcales-Tissierellales	Peptostreptococcales-Tissierellales	Alkaliphilus	0	0	0	0	0	0	15	0	0	0	0
OTU_14	Bacteria	Patescibacteria	Saccharimonadia	Saccharimonadales	Saccharimonadales	Saccharimonadales	3242	6079	6853	3290	1542	4150	5523	1969	1537	2033	892
OTU_140	Bacteria	Bacteroidota	Bacteroidia	Bacteroidales	Rikenellaceae	Alistipes	101	145	299	19	23	41	76	56	43	33	41
OTU_1402	Bacteria	Actinobacteriota	Thermoleophilia	Solirubrobacterales	Solirubrobacteraceae	Parviterribacter	0	0	0	0	0	3	11	0	0	0	0
OTU_1403	Bacteria	Actinobacteriota	Acidimicrobiia	Microtrichales	uncultured	uncultured	0	0	3	3	0	8	0	0	0	0	0
OTU_1405	Bacteria	Actinobacteriota	Actinobacteria	Micrococcales	Dermacoccaceae	Luteipulveratus	0	14	0	0	0	0	0	0	0	0	0
OTU_1406	Bacteria	Actinobacteriota	Actinobacteria	Actinomycetales	Actinomycetales_Incertae_Sedis	Candidatus_Ancillula	0	0	0	0	4	0	0	10	0	0	0
OTU_1407	Bacteria	Actinobacteriota	Actinobacteria	Frankiales	Sporichthyaceae	-	0	0	0	0	0	14	0	0	0	0	0
OTU_1409	Bacteria	Actinobacteriota	Actinobacteria	Frankiales	Cryptosporangiaceae	Cryptosporangium	0	14	0	0	0	0	0	0	0	0	0
OTU_141	Bacteria	Chloroflexi	Dehalococcoidia	vadinBA26	-	-	94	76	62	77	5	558	240	111	76	99	407
OTU_1410	Bacteria	Bacteroidota	Bacteroidia	Chitinophagales	Chitinophagaceae	Edaphobaculum	0	0	2	0	0	0	0	0	0	0	0
OTU_1411	Bacteria	Proteobacteria	Gammaproteobacteria	Xanthomonadales	Xanthomonadaceae	-	0	0	0	8	0	0	0	0	0	0	0
OTU_1412	Bacteria	Firmicutes	Clostridia	Clostridiales	Clostridiaceae	Clostridium_sensu_stricto_2	0	0	0	6	0	8	0	0	0	0	0
OTU_1415	Bacteria	Firmicutes	Syntrophomonadia	Syntrophomonadales	Syntrophomonadaceae	Pelospora	0	0	0	0	0	0	0	0	0	0	13
OTU_1416	Bacteria	Actinobacteriota	Actinobacteria	Propionibacteriales	Propionibacteriaceae	Microlunatus	0	0	0	0	8	5	0	0	0	0	0
OTU_1419	Bacteria	Actinobacteriota	Thermoleophilia	uncultured	uncultured	uncultured	0	0	0	0	3	10	0	0	0	0	0
OTU_142	Bacteria	Patescibacteria	Saccharimonadia	Saccharimonadales	Saccharimonadales	Saccharimonadales	94	52	0	0	17	0	139	0	0	0	0
OTU_1423	Bacteria	Desulfobacterota	Desulfobacteria	Desulfobacterales	Desulfosarcinaceae	-	0	0	0	10	0	0	3	0	0	0	0
OTU_1424	Bacteria	Desulfobacterota	Desulfovibrionia	Desulfovibrionales	Desulfovibrionaceae	Desulfovibrio	0	0	0	0	0	0	0	0	2	3	0
OTU_1425	Bacteria	Actinobacteriota	Actinobacteria	Frankiales	Geodermatophilaceae	Antricoccus	0	0	0	0	0	5	8	0	0	0	0
OTU_1428	Bacteria	Actinobacteriota	Actinobacteria	Kineosporiales	Kineosporiaceae	-	0	0	0	0	13	0	0	0	0	0	0
OTU_1429	Bacteria	Chloroflexi	Ktedonobacteria	Ktedonobacterales	Ktedonobacteraceae	JG30a-KF-32	0	0	0	0	3	0	0	0	0	0	0
OTU_143	Bacteria	Firmicutes	Clostridia	Oscillospirales	Oscillospiraceae	NK4A214_group	89	908	189	280	144	415	932	721	896	732	1371
OTU_1432	Bacteria	Actinobacteriota	Actinobacteria	Corynebacteriales	Corynebacteriaceae	Corynebacterium	0	13	0	0	0	0	0	0	0	0	0
OTU_1433	Bacteria	Actinobacteriota	Actinobacteria	Propionibacteriales	Nocardioidaceae	Nocardioides	0	0	0	13	0	0	0	0	0	0	0
OTU_1437	Bacteria	Actinobacteriota	Thermoleophilia	Gaiellales	uncultured	uncultured	0	0	2	0	5	0	0	0	0	0	0
OTU_1439	Bacteria	Planctomycetota	Phycisphaerae	Tepidisphaerales	WD2101_soil_group	-	0	0	0	12	0	0	0	0	0	0	0
OTU_144	Bacteria	Spirochaetota	Spirochaetia	Spirochaetales	Spirochaetaceae	Termite_Treponema_cluster	88	12	0	12	38	0	0	0	0	0	0
OTU_1440	Bacteria	Firmicutes	Clostridia	Oscillospirales	Butyricicoccaceae	UCG-009	0	0	4	0	0	0	0	0	0	0	0
OTU_1442	Bacteria	Actinobacteriota	Actinobacteria	Micrococcales	Microbacteriaceae	Schumannella	0	12	0	0	0	0	0	0	0	0	0
OTU_1446	Bacteria	Proteobacteria	Alphaproteobacteria	Acetobacterales	Acetobacteraceae	Acidisphaera	0	0	0	0	0	0	0	6	0	0	0
OTU_1447	Bacteria	Firmicutes	Desulfotomaculia	Desulfotomaculales	Desulfotomaculales	-	0	0	0	0	0	0	12	0	0	0	0
OTU_1448	Bacteria	Verrucomicrobiota	Verrucomicrobiae	Pedosphaerales	Pedosphaeraceae	uncultured	0	0	12	0	0	0	0	0	0	0	0
OTU_1451	Bacteria	Firmicutes	Clostridia	Clostridiales	Clostridiaceae	Clostridium_sensu_stricto_18	0	0	0	0	11	0	0	0	0	0	0
OTU_1452	Bacteria	Firmicutes	Bacilli	Bacillales	Bacillaceae	Oceanobacillus	0	0	0	0	0	0	11	0	0	0	0
OTU_1453	Bacteria	Firmicutes	Bacilli	Bacillales	Bacillaceae	Bacillus	0	0	0	0	11	0	0	0	0	0	0
OTU_1454	Bacteria	Acidobacteriota	Blastocatellia	Blastocatellales	Blastocatellaceae	uncultured	0	0	0	0	11	0	0	0	0	0	0
OTU_1456	Bacteria	Firmicutes	Bacilli	Bacillales	Bacillaceae	Oceanobacillus	0	0	0	11	0	0	0	0	0	0	0
OTU_1457	Bacteria	Acidobacteriota	Blastocatellia	Blastocatellales	Blastocatellaceae	-	0	0	5	0	0	0	0	0	0	0	0
OTU_1458	Bacteria	Firmicutes	Bacilli	Thermoactinomycetales	Thermoactinomycetaceae	Shimazuella	0	0	0	0	0	6	0	0	0	0	0
OTU_1459	Bacteria	Firmicutes	Clostridia	Clostridiales	Clostridiaceae	Clostridium_sensu_stricto_10	0	0	0	11	0	0	0	0	0	0	0
OTU_146	Bacteria	Firmicutes	Clostridia	Oscillospirales	Oscillospiraceae	Intestinimonas	85	367	129	0	0	0	149	53	16	19	0
OTU_1460	Bacteria	Planctomycetota	Phycisphaerae	Tepidisphaerales	Tepidisphaeraceae	Tepidisphaera	0	0	2	0	0	0	9	0	0	0	0
OTU_1461	Bacteria	Bacteroidota	Bacteroidia	Bacteroidales	Marinifilaceae	uncultured	0	0	0	0	0	0	0	8	0	0	0
OTU_1466	Bacteria	Cyanobacteria	Cyanobacteriia	Cyanobacteriales	uncultured	uncultured	0	3	0	0	0	0	8	0	0	0	0
OTU_1469	Bacteria	Actinobacteriota	Thermoleophilia	Solirubrobacterales	Solirubrobacteraceae	Patulibacter	0	0	0	9	0	0	0	0	0	0	2
OTU_147	Bacteria	Spirochaetota	Leptospirae	Leptospirales	Leptospiraceae	RBG-16-49-21	83	315	150	653	105	320	946	280	633	440	533
OTU_1470	Bacteria	Actinobacteriota	Thermoleophilia	Solirubrobacterales	-	-	0	0	0	10	0	0	0	0	0	0	0
OTU_1472	Bacteria	Bacteroidota	SJA-28	-	-	-	0	0	0	10	0	0	0	0	0	0	0
OTU_1473	Bacteria	Firmicutes	Bacilli	Alicyclobacillales	Alicyclobacillaceae	Tumebacillus	0	0	0	10	0	0	0	0	0	0	0
OTU_1474	Bacteria	Proteobacteria	Alphaproteobacteria	Rhizobiales	Rhodomicrobiaceae	Rhodomicrobium	0	0	0	0	0	0	0	10	0	0	0
OTU_1475	Bacteria	Proteobacteria	Alphaproteobacteria	Rhizobiales	Beijerinckiaceae	Methylobacterium-Methylorubrum	0	0	0	0	0	0	0	4	6	0	0
OTU_1476	Bacteria	Firmicutes	Bacilli	RF39	-	-	0	0	0	0	0	0	0	0	0	0	10
OTU_1478	Bacteria	Bdellovibrionota	Bdellovibrionia	Bacteriovoracales	Bacteriovoracaceae	-	0	0	0	0	0	0	0	0	0	0	10
OTU_1479	Bacteria	Planctomycetota	Planctomycetes	Isosphaerales	Isosphaeraceae	Paludisphaera	0	0	0	10	0	0	0	0	0	0	0
OTU_148	Bacteria	Firmicutes	Clostridia	Oscillospirales	uncultured	uncultured	82	1306	344	230	159	307	314	390	488	395	689
OTU_1481	Bacteria	Patescibacteria	Saccharimonadia	Saccharimonadales	WWH38	-	0	0	0	0	0	0	0	10	0	0	0
OTU_1482	Bacteria	Bacteroidota	Bacteroidia	-	-	-	0	0	0	2	0	0	0	0	0	0	0
OTU_1483	Bacteria	Actinobacteriota	Actinobacteria	Propionibacteriales	Nocardioidaceae	Nocardioides	0	0	0	0	10	0	0	0	0	0	0
OTU_1484	Bacteria	Gemmatimonadota	Gemmatimonadetes	Gemmatimonadales	Gemmatimonadaceae	Gemmatimonas	0	4	0	0	0	0	0	0	0	0	0
OTU_149	Bacteria	Firmicutes	Incertae_Sedis	DTU014	-	-	80	208	203	41	26	188	165	144	389	340	0
OTU_1490	Bacteria	Proteobacteria	Alphaproteobacteria	Sphingomonadales	Sphingomonadaceae	Sphingobium	0	2	0	0	0	0	0	0	0	0	0
OTU_1493	Bacteria	Bacteroidota	Bacteroidia	Chitinophagales	Chitinophagaceae	Flavisolibacter	0	0	0	0	2	0	0	7	0	0	0
OTU_1494	Bacteria	Firmicutes	Clostridia	Peptostreptococcales-Tissierellales	Peptostreptococcales-Tissierellales	Tissierella	0	0	0	0	3	0	3	0	0	0	0
OTU_1496	Bacteria	Verrucomicrobiota	Verrucomicrobiae	Methylacidiphilales	Methylacidiphilaceae	uncultured	0	0	0	0	2	0	0	0	0	0	0
OTU_1497	Bacteria	Actinobacteriota	Actinobacteria	Corynebacteriales	Nocardiaceae	Smaragdicoccus	0	0	6	0	3	0	0	0	0	0	0
OTU_15	Bacteria	Firmicutes	Clostridia	Oscillospirales	Oscillospiraceae	uncultured	3220	2510	2054	3738	1003	1280	1685	1132	2274	4698	3908
OTU_150	Bacteria	Actinobacteriota	Actinobacteria	Micrococcales	Cellulomonadaceae	Cellulomonas	76	377	61	1754	273	512	726	53	168	52	29
OTU_1500	Bacteria	Actinobacteriota	Acidimicrobiia	Microtrichales	Ilumatobacteraceae	CL500-29_marine_group	0	0	0	0	0	0	0	9	0	0	0
OTU_1501	Bacteria	Actinobacteriota	Actinobacteria	Kineosporiales	Kineosporiaceae	Kineosporia	0	0	0	0	0	0	0	9	0	0	0
OTU_1509	Bacteria	Chloroflexi	Chloroflexia	Thermomicrobiales	JG30-KF-CM45	-	0	0	0	9	0	0	0	0	0	0	0
OTU_151	Bacteria	Acidobacteriota	Holophagae	Holophagales	Holophagaceae	uncultured	76	23	0	0	5	0	6	59	22	45	64
OTU_1510	Bacteria	Proteobacteria	Alphaproteobacteria	Sphingomonadales	Sphingomonadaceae	Sphingobium	0	0	0	0	9	0	0	0	0	0	0
OTU_1511	Bacteria	Firmicutes	Clostridia	Clostridia	Hungateiclostridiaceae	Ruminiclostridium	0	0	0	0	0	9	0	0	0	0	0
OTU_1512	Bacteria	Actinobacteriota	Acidimicrobiia	IMCC26256	-	-	0	0	0	0	0	9	0	0	0	0	0
OTU_1513	Bacteria	Chloroflexi	Ktedonobacteria	C0119	-	-	0	0	0	0	0	0	9	0	0	0	0
OTU_1514	Bacteria	Myxococcota	Polyangia	Polyangiales	BIrii41	-	0	0	0	7	0	0	0	0	0	0	0
OTU_1516	Bacteria	Spirochaetota	Spirochaetia	Spirochaetales	Spirochaetaceae	Spirochaeta	0	0	0	0	0	0	0	0	0	0	9
OTU_1518	Bacteria	Planctomycetota	Planctomycetes	Pirellulales	Pirellulaceae	Pirellula	0	0	9	0	0	0	0	0	0	0	0
OTU_1519	Bacteria	Firmicutes	Clostridia	Clostridia	Gracilibacteraceae	-	0	0	3	0	0	0	2	0	0	0	0
OTU_152	Bacteria	WS4	-	-	-	-	74	111	497	42	148	12	301	118	278	0	0
OTU_1522	Bacteria	Myxococcota	Polyangia	Polyangiales	Sandaracinaceae	uncultured	0	0	0	8	0	0	0	0	0	0	0
OTU_1523	Bacteria	Planctomycetota	Planctomycetes	Pirellulales	Pirellulaceae	Pir4_lineage	0	0	2	0	6	0	0	0	0	0	0
OTU_1524	Bacteria	Actinobacteriota	Thermoleophilia	Gaiellales	uncultured	uncultured	0	0	0	0	2	6	0	0	0	0	0
OTU_1525	Bacteria	Planctomycetota	Phycisphaerae	Tepidisphaerales	CPla-3_termite_group	CPla-3_termite_group	0	0	4	0	4	0	0	0	0	0	0
OTU_1527	Bacteria	Firmicutes	Clostridia	Clostridia_UCG-014	-	-	0	0	0	0	0	0	3	0	0	0	0
OTU_1528	Bacteria	Proteobacteria	Gammaproteobacteria	uncultured	uncultured	uncultured	0	0	0	3	0	0	0	0	0	0	0
OTU_1529	Bacteria	Chloroflexi	OLB14	-	-	-	0	0	0	0	0	0	0	8	0	0	0
OTU_153	Bacteria	Firmicutes	Clostridia	Oscillospirales	UCG-010	-	73	563	2962	200	78	345	433	342	764	651	1082
OTU_1530	Bacteria	Actinobacteriota	Acidimicrobiia	Microtrichales	uncultured	uncultured	0	0	0	0	0	8	0	0	0	0	0
OTU_1531	Bacteria	Proteobacteria	Gammaproteobacteria	Xanthomonadales	Rhodanobacteraceae	Rhodanobacter	0	0	0	8	0	0	0	0	0	0	0
OTU_1539	Bacteria	Proteobacteria	Alphaproteobacteria	Rhizobiales	Rhizobiaceae	Aureimonas	0	8	0	0	0	0	0	0	0	0	0
OTU_154	Bacteria	Bdellovibrionota	Oligoflexia	Oligoflexales	uncultured	uncultured	68	60	0	28	5	9	11	9	70	89	20
OTU_1541	Bacteria	Firmicutes	Desulfitobacteriia	Desulfitobacteriales	Desulfitobacteriaceae	-	0	0	8	0	0	0	0	0	0	0	0
OTU_1542	Bacteria	Chloroflexi	Anaerolineae	Caldilineales	Caldilineaceae	uncultured	0	0	0	0	0	0	0	8	0	0	0
OTU_1543	Bacteria	Actinobacteriota	Thermoleophilia	Solirubrobacterales	Solirubrobacteraceae	Solirubrobacter	0	0	0	8	0	0	0	0	0	0	0
OTU_1544	Bacteria	Firmicutes	Negativicutes	Veillonellales-Selenomonadales	Sporomusaceae	Anaerosporomusa	0	0	0	8	0	0	0	0	0	0	0
OTU_1545	Bacteria	Planctomycetota	Planctomycetes	Pirellulales	Pirellulaceae	Pirellula	0	0	0	0	8	0	0	0	0	0	0
OTU_1546	Bacteria	Desulfobacterota	Desulfobulbia	Desulfobulbales	Desulfocapsaceae	-	0	0	0	0	0	0	0	0	0	8	0
OTU_1547	Bacteria	Firmicutes	Bacilli	Bacillales	Bacillaceae	Bacillus	0	0	0	0	0	8	0	0	0	0	0
OTU_1548	Bacteria	Firmicutes	Bacilli	Paenibacillales	Paenibacillaceae	Paenibacillus	0	0	0	0	0	8	0	0	0	0	0
OTU_1549	Bacteria	Verrucomicrobiota	Verrucomicrobiae	Chthoniobacterales	Chthoniobacteraceae	Chthoniobacter	0	0	0	0	7	0	0	0	0	0	0
OTU_155	Bacteria	Patescibacteria	Gracilibacteria	Absconditabacteriales_(SR1)	Absconditabacteriales_(SR1)	Absconditabacteriales_(SR1)	67	229	116	41	21	0	316	70	125	95	0
OTU_1550	Bacteria	Planctomycetota	Planctomycetes	Gemmatales	Gemmataceae	Fimbriiglobus	0	0	0	0	7	0	0	0	0	0	0
OTU_1558	Bacteria	Firmicutes	Clostridia	Peptostreptococcales-Tissierellales	Peptostreptococcales-Tissierellales	Gottschalkia	0	0	0	0	2	2	0	3	0	0	0
OTU_1559	Bacteria	Acidobacteriota	Vicinamibacteria	Subgroup_17	Subgroup_17	Subgroup_17	0	0	0	0	7	0	0	0	0	0	0
OTU_156	Bacteria	Firmicutes	Negativicutes	Acidaminococcales	Acidaminococcaceae	uncultured	66	80	37	10	3	16	23	36	70	56	49
OTU_1562	Bacteria	Actinobacteriota	Actinobacteria	Frankiales	Geodermatophilaceae	-	0	0	0	0	0	7	0	0	0	0	0
OTU_1563	Bacteria	Actinobacteriota	Actinobacteria	Micromonosporales	Micromonosporaceae	Stackebrandtia	0	0	0	0	0	7	0	0	0	0	0
OTU_1564	Bacteria	Myxococcota	Polyangia	Haliangiales	Haliangiaceae	Haliangium	0	0	0	7	0	0	0	0	0	0	0
OTU_1565	Bacteria	FCPU426	FCPU426	FCPU426	FCPU426	FCPU426	0	0	0	7	0	0	0	0	0	0	0
OTU_1566	Bacteria	Actinobacteriota	Actinobacteria	Corynebacteriales	Nocardiaceae	Gordonia	0	0	0	0	0	7	0	0	0	0	0
OTU_1567	Bacteria	Myxococcota	Polyangia	Polyangiales	Polyangiaceae	Sorangium	0	0	0	0	0	7	0	0	0	0	0
OTU_1568	Bacteria	Firmicutes	Bacilli	Thermoactinomycetales	Thermoactinomycetaceae	Geothermomicrobium	0	0	0	7	0	0	0	0	0	0	0
OTU_1569	Bacteria	Actinobacteriota	Actinobacteria	Glycomycetales	Glycomycetaceae	uncultured	0	0	5	0	0	2	0	0	0	0	0
OTU_157	Bacteria	Proteobacteria	Gammaproteobacteria	Burkholderiales	Nitrosomonadaceae	Nitrosomonas	66	17	15	0	0	0	12	0	20	0	23
OTU_1570	Bacteria	Firmicutes	Clostridia	Thermincolales	Thermincolaceae	Thermincola	0	0	0	0	0	7	0	0	0	0	0
OTU_1571	Bacteria	Firmicutes	Syntrophomonadia	Syntrophomonadales	Syntrophomonadaceae	Thermosyntropha	0	0	0	0	0	0	7	0	0	0	0
OTU_1572	Bacteria	Acidobacteriota	Blastocatellia	Pyrinomonadales	Pyrinomonadaceae	RB41	0	0	7	0	0	0	0	0	0	0	0
OTU_1573	Bacteria	Acidobacteriota	Blastocatellia	Blastocatellales	Blastocatellaceae	Aridibacter	0	0	0	0	0	0	0	7	0	0	0
OTU_1574	Bacteria	Firmicutes	Bacilli	Brevibacillales	Brevibacillaceae	Brevibacillus	0	0	7	0	0	0	0	0	0	0	0
OTU_1575	Bacteria	Actinobacteriota	Actinobacteria	Kineosporiales	Kineosporiaceae	Kineosporia	0	0	0	0	0	0	0	7	0	0	0
OTU_1576	Bacteria	Spirochaetota	Leptospirae	Leptospirales	Leptospiraceae	Rs-H88_termite_group	0	0	0	0	0	0	0	0	0	7	0
OTU_1577	Bacteria	Firmicutes	Clostridia	Clostridiales	Clostridiaceae	Clostridium_sensu_stricto_8	0	0	0	0	0	0	0	0	0	0	7
OTU_1578	Bacteria	Firmicutes	Negativicutes	Veillonellales-Selenomonadales	Sporomusaceae	Sporomusa	0	0	0	0	0	0	0	0	0	0	7
OTU_1579	Bacteria	Verrucomicrobiota	Verrucomicrobiae	Opitutales	Opitutaceae	Ereboglobus	0	0	0	0	0	0	0	0	0	0	7
OTU_158	Bacteria	Proteobacteria	Alphaproteobacteria	Rhizobiales	Xanthobacteraceae	Bradyrhizobium	62	151	520	870	181	1002	1087	199	67	18	0
OTU_1580	Bacteria	Cyanobacteria	Cyanobacteriia	Cyanobacteriales	Chroococcidiopsaceae	Chroococcidiopsis_SAG_2023	0	7	0	0	0	0	0	0	0	0	0
OTU_1584	Bacteria	Planctomycetota	Phycisphaerae	Pla1_lineage	Pla1_lineage	Pla1_lineage	0	0	2	0	0	2	2	0	0	0	0
OTU_1585	Bacteria	Firmicutes	Clostridia	Thermincolales	Thermincolaceae	Thermincola	0	0	0	0	0	0	0	0	0	0	3
OTU_1586	Bacteria	Chloroflexi	Chloroflexia	Thermomicrobiales	JG30-KF-CM45	-	0	0	0	4	0	0	2	0	0	0	0
OTU_1588	Bacteria	Cloacimonadota	Cloacimonadia	Cloacimonadales	CW-1_termite_group	CW-1_termite_group	0	0	0	0	6	0	0	0	0	0	0
OTU_1589	Bacteria	Bdellovibrionota	Oligoflexia	0319-6G20	-	-	0	0	6	0	0	0	0	0	0	0	0
OTU_159	Bacteria	Firmicutes	Clostridia	Oscillospirales	Ruminococcaceae	Paludicola	62	0	0	0	0	0	0	0	0	0	9
OTU_1590	Bacteria	Planctomycetota	Planctomycetes	Isosphaerales	Isosphaeraceae	Paludisphaera	0	0	0	6	0	0	0	0	0	0	0
OTU_1598	Bacteria	Actinobacteriota	Actinobacteria	Kineosporiales	Kineosporiaceae	Kineococcus	0	6	0	0	0	0	0	0	0	0	0
OTU_1599	Bacteria	Actinobacteriota	Actinobacteria	Kineosporiales	Kineosporiaceae	Pseudokineococcus	0	6	0	0	0	0	0	0	0	0	0
OTU_16	Bacteria	Actinobacteriota	Coriobacteriia	Coriobacteriales	Coriobacteriales_Incertae_Sedis	uncultured	2988	3828	5056	6028	2073	5710	5171	2925	3382	2387	4141
OTU_160	Bacteria	Actinobacteriota	Actinobacteria	Actinomycetales	Actinomycetaceae	Actinomyces	59	46	0	0	7	35	4	0	0	0	0
OTU_1600	Bacteria	Acidobacteriota	Acidobacteriae	Acidobacteriales	Acidobacteriaceae_(Subgroup_1)	Terriglobus	0	0	4	0	0	0	2	0	0	0	0
OTU_1601	Bacteria	Sumerlaeota	Sumerlaeia	Sumerlaeales	Sumerlaeaceae	Sumerlaea	0	0	0	6	0	0	0	0	0	0	0
OTU_1602	Bacteria	Proteobacteria	Alphaproteobacteria	Rhizobiales	D05-2	-	0	0	0	6	0	0	0	0	0	0	0
OTU_1603	Bacteria	Acidobacteriota	Vicinamibacteria	Vicinamibacterales	Vicinamibacteraceae	uncultured	0	0	0	6	0	0	0	0	0	0	0
OTU_1604	Bacteria	Actinobacteriota	Actinobacteria	Micrococcales	Promicromonosporaceae	Promicromonospora	0	0	0	6	0	0	0	0	0	0	0
OTU_1605	Bacteria	Firmicutes	Bacilli	Alicyclobacillales	Alicyclobacillaceae	Tumebacillus	0	0	0	6	0	0	0	0	0	0	0
OTU_1606	Bacteria	Entotheonellaeota	Entotheonellia	Entotheonellales	Entotheonellaceae	Entotheonellaceae	0	0	0	0	6	0	0	0	0	0	0
OTU_1607	Bacteria	Acidobacteriota	Vicinamibacteria	Vicinamibacterales	-	-	0	0	0	0	6	0	0	0	0	0	0
OTU_1608	Bacteria	Planctomycetota	Phycisphaerae	Tepidisphaerales	Tepidisphaeraceae	Tepidisphaeraceae	0	0	0	0	6	0	0	0	0	0	0
OTU_1609	Bacteria	Proteobacteria	Alphaproteobacteria	Rhizobiales	Rhizobiales_Incertae_Sedis	Alsobacter	0	0	0	0	0	0	6	0	0	0	0
OTU_161	Bacteria	Actinobacteriota	Actinobacteria	Pseudonocardiales	Pseudonocardiaceae	Saccharopolyspora	57	391	0	755	56	85	201	83	0	0	20
OTU_1610	Bacteria	Gemmatimonadota	Gemmatimonadetes	Gemmatimonadales	Gemmatimonadaceae	Gemmatimonas	0	0	0	0	0	0	6	0	0	0	0
OTU_1611	Bacteria	Firmicutes	Bacilli	Acholeplasmatales	Acholeplasmataceae	Acholeplasma	0	0	0	0	0	0	0	6	0	0	0
OTU_1613	Bacteria	Chloroflexi	Ktedonobacteria	Ktedonobacterales	Ktedonobacteraceae	1921-3	0	0	0	0	0	0	0	5	0	0	0
OTU_1614	Bacteria	Cyanobacteria	Cyanobacteriia	Cyanobacteriales	Nostocaceae	Mastigocladopsis_PCC-10914	0	0	0	0	0	0	0	5	0	0	0
OTU_1615	Bacteria	Myxococcota	Myxococcia	Myxococcales	-	-	0	0	0	0	0	0	5	0	0	0	0
OTU_1616	Bacteria	Actinobacteriota	Actinobacteria	Streptosporangiales	Streptosporangiales_Incertae_Sedis	Motilibacter	0	0	0	0	0	0	5	0	0	0	0
OTU_1617	Bacteria	Proteobacteria	Gammaproteobacteria	Burkholderiales	Nitrosomonadaceae	mle1-7	0	0	3	0	2	0	0	0	0	0	0
OTU_1618	Bacteria	Actinobacteriota	Actinobacteria	Micromonosporales	Micromonosporaceae	uncultured	0	0	0	3	0	0	0	0	0	0	2
OTU_1619	Bacteria	Desulfobacterota	uncultured	uncultured	uncultured	uncultured	0	0	0	2	0	0	0	0	0	0	0
OTU_162	Bacteria	Proteobacteria	Alphaproteobacteria	Rhodospirillales	uncultured	uncultured	57	92	37	0	59	6	74	31	22	26	8
OTU_1620	Bacteria	Proteobacteria	Alphaproteobacteria	Elsterales	Elsteraceae	uncultured	0	0	0	0	0	5	0	0	0	0	0
OTU_1621	Bacteria	Proteobacteria	Gammaproteobacteria	Gammaproteobacteria_Incertae_Sedis	Unknown_Family	Acidibacter	0	0	0	0	0	0	5	0	0	0	0
OTU_1623	Bacteria	Actinobacteriota	Actinobacteria	Frankiales	Sporichthyaceae	uncultured	0	0	0	0	0	5	0	0	0	0	0
OTU_1625	Bacteria	Proteobacteria	Gammaproteobacteria	Cellvibrionales	Cellvibrionaceae	Cellvibrio	0	5	0	0	0	0	0	0	0	0	0
OTU_1628	Bacteria	Planctomycetota	Planctomycetes	Pirellulales	Pirellulaceae	Pirellula	0	5	0	0	0	0	0	0	0	0	0
OTU_1629	Bacteria	Margulisbacteria	Margulisbacteria	Margulisbacteria	Margulisbacteria	Margulisbacteria	0	0	5	0	0	0	0	0	0	0	0
OTU_163	Bacteria	Firmicutes	Clostridia	Oscillospirales	Oscillospiraceae	Sporobacter	54	38	0	0	24	0	0	0	0	0	0
OTU_1630	Bacteria	Proteobacteria	Alphaproteobacteria	Tistrellales	Geminicoccaceae	Candidatus_Alysiosphaera	0	0	5	0	0	0	0	0	0	0	0
OTU_1631	Bacteria	Chloroflexi	Ktedonobacteria	Ktedonobacterales	Ktedonobacteraceae	G12-WMSP1	0	0	3	0	0	0	0	2	0	0	0
OTU_1632	Bacteria	MBNT15	-	-	-	-	0	0	0	5	0	0	0	0	0	0	0
OTU_1633	Bacteria	Actinobacteriota	Actinobacteria	Streptosporangiales	Nocardiopsaceae	Nocardiopsis	0	0	0	5	0	0	0	0	0	0	0
OTU_1636	Bacteria	Cyanobacteria	Cyanobacteriia	Cyanobacteriales	uncultured	uncultured	0	5	0	0	0	0	0	0	0	0	0
OTU_1638	Bacteria	Bacteroidota	Bacteroidia	Sphingobacteriales	Sphingobacteriaceae	Arcticibacter	0	0	0	0	5	0	0	0	0	0	0
OTU_1639	Bacteria	Proteobacteria	Gammaproteobacteria	R7C24	-	-	0	0	0	0	5	0	0	0	0	0	0
OTU_164	Bacteria	Firmicutes	Syntrophomonadia	Syntrophomonadales	Syntrophomonadaceae	Syntrophomonas	53	98	85	321	0	478	140	126	226	199	609
OTU_1640	Bacteria	Actinobacteriota	Actinobacteria	Micromonosporales	Micromonosporaceae	Actinoplanes	0	0	0	0	5	0	0	0	0	0	0
OTU_1642	Bacteria	Desulfobacterota	uncultured	uncultured	uncultured	uncultured	0	0	0	0	0	5	0	0	0	0	0
OTU_1645	Bacteria	Chloroflexi	Ktedonobacteria	Ktedonobacterales	JG30-KF-AS9	-	0	0	0	0	0	5	0	0	0	0	0
OTU_1647	Bacteria	Chloroflexi	KD4-96	-	-	-	0	0	0	0	5	0	0	0	0	0	0
OTU_1649	Bacteria	Actinobacteriota	Acidimicrobiia	Microtrichales	Ilumatobacteraceae	uncultured	0	0	0	0	0	0	4	0	0	0	0
OTU_165	Bacteria	Bacteroidota	Bacteroidia	Bacteroidales	Paludibacteraceae	F0058	53	26	22	0	8	0	60	10	29	0	67
OTU_1650	Bacteria	Firmicutes	Bacilli	Paenibacillales	Paenibacillaceae	Paenibacillus	0	0	0	4	0	0	0	0	0	0	0
OTU_1651	Bacteria	Actinobacteriota	Acidimicrobiia	Microtrichales	Ilumatobacteraceae	uncultured	0	0	0	4	0	0	0	0	0	0	0
OTU_1652	Bacteria	Firmicutes	Bacilli	Paenibacillales	Paenibacillaceae	Paenibacillus	0	0	0	0	4	0	0	0	0	0	0
OTU_1653	Bacteria	Proteobacteria	Alphaproteobacteria	Rhizobiales	Rhizobiales_Incertae_Sedis	Nordella	0	0	0	4	0	0	0	0	0	0	0
OTU_1654	Bacteria	Firmicutes	Bacilli	Paenibacillales	Paenibacillaceae	uncultured	0	0	0	0	0	4	0	0	0	0	0
OTU_1655	Bacteria	Actinobacteriota	Thermoleophilia	Solirubrobacterales	-	-	0	0	0	0	0	0	4	0	0	0	0
OTU_1656	Bacteria	Actinobacteriota	Acidimicrobiia	uncultured	uncultured	uncultured	0	0	0	0	0	0	4	0	0	0	0
OTU_1657	Bacteria	Firmicutes	Bacilli	Thermoactinomycetales	Thermoactinomycetaceae	Risungbinella	0	0	0	0	0	0	4	0	0	0	0
OTU_1658	Bacteria	Firmicutes	Bacilli	Bacillales	Bacillaceae	Oceanobacillus	0	0	0	0	0	0	4	0	0	0	0
OTU_166	Bacteria	Bacteroidota	Kapabacteria	Kapabacteriales	Kapabacteriales	Kapabacteriales	52	0	3	0	34	0	6	0	10	46	50
OTU_1660	Bacteria	Firmicutes	Bacilli	Thermoactinomycetales	Thermoactinomycetaceae	Seinonella	0	0	0	0	0	0	4	0	0	0	0
OTU_1661	Bacteria	Proteobacteria	Alphaproteobacteria	Rhizobiales	Beijerinckiaceae	uncultured	0	0	0	0	0	0	0	4	0	0	0
OTU_1662	Bacteria	Firmicutes	Negativicutes	Veillonellales-Selenomonadales	Sporomusaceae	Sporomusa	0	0	0	4	0	0	0	0	0	0	0
OTU_1663	Bacteria	Firmicutes	Clostridia	Peptococcales	Peptococcaceae	Peptococcaceae	0	2	0	0	0	2	0	0	0	0	0
OTU_1666	Bacteria	Actinobacteriota	Actinobacteria	Kineosporiales	Kineosporiaceae	Kineosporia	0	0	0	0	0	0	0	0	0	4	0
OTU_1667	Bacteria	Actinobacteriota	Actinobacteria	Streptosporangiales	Thermomonosporaceae	Actinomadura	0	0	0	0	0	4	0	0	0	0	0
OTU_1668	Bacteria	Actinobacteriota	Actinobacteria	Corynebacteriales	Nocardiaceae	Rhodococcus	0	0	0	4	0	0	0	0	0	0	0
OTU_1669	Bacteria	Myxococcota	Myxococcia	Myxococcales	Myxococcaceae	Myxococcus	0	0	0	4	0	0	0	0	0	0	0
OTU_167	Bacteria	Firmicutes	Clostridia	Oscillospirales	Ruminococcaceae	Candidatus_Soleaferrea	51	335	11	48	19	65	32	35	88	21	185
OTU_168	Bacteria	Firmicutes	Clostridia	Christensenellales	Christensenellaceae	uncultured	49	305	87	90	97	166	328	127	122	113	108
OTU_1687	Bacteria	Cyanobacteria	Cyanobacteriia	Cyanobacteriales	Chroococcidiopsaceae	-	0	4	0	0	0	0	0	0	0	0	0
OTU_1688	Bacteria	Proteobacteria	Alphaproteobacteria	Rhizobiales	Methylopilaceae	Methylopila	0	0	0	4	0	0	0	0	0	0	0
OTU_1689	Bacteria	Chloroflexi	Chloroflexia	Thermomicrobiales	Thermomicrobiaceae	Nitrolancea	0	0	0	4	0	0	0	0	0	0	0
OTU_169	Bacteria	Planctomycetota	Planctomycetes	Pirellulales	Pirellulaceae	CPla-4_termite_group	48	58	0	0	6	166	23	0	26	6	0
OTU_1690	Bacteria	Proteobacteria	Gammaproteobacteria	Xanthomonadales	Rhodanobacteraceae	Chujaibacter	0	0	0	4	0	0	0	0	0	0	0
OTU_1691	Bacteria	Acidobacteriota	Blastocatellia	Blastocatellales	Blastocatellaceae	Stenotrophobacter	0	0	4	0	0	0	0	0	0	0	0
OTU_1692	Bacteria	Verrucomicrobiota	Verrucomicrobiae	Verrucomicrobiales	Verrucomicrobiaceae	uncultured	0	0	4	0	0	0	0	0	0	0	0
OTU_1693	Bacteria	Planctomycetota	Phycisphaerae	Tepidisphaerales	WD2101_soil_group	-	0	0	4	0	0	0	0	0	0	0	0
OTU_1695	Bacteria	Verrucomicrobiota	Verrucomicrobiae	Chthoniobacterales	Chthoniobacteraceae	Candidatus_Udaeobacter	0	0	4	0	0	0	0	0	0	0	0
OTU_1696	Bacteria	Bacteroidota	Bacteroidia	Cytophagales	Cytophagaceae	Sporocytophaga	0	0	4	0	0	0	0	0	0	0	0
OTU_1697	Bacteria	Planctomycetota	Planctomycetes	Planctomycetales	Rubinisphaeraceae	SH-PL14	0	4	0	0	0	0	0	0	0	0	0
OTU_1698	Bacteria	Chloroflexi	Chloroflexia	Thermomicrobiales	AKYG1722	-	0	0	0	3	0	0	0	0	0	0	0
OTU_1699	Bacteria	Cyanobacteria	Sericytochromatia	Sericytochromatia	Sericytochromatia	Sericytochromatia	0	0	0	3	0	0	0	0	0	0	0
OTU_17	Bacteria	Firmicutes	Clostridia	-	-	-	2916	2968	2030	2724	1345	8530	2140	1197	1855	1436	2745
OTU_170	Bacteria	Desulfobacterota	Desulfovibrionia	Desulfovibrionales	Desulfovibrionaceae	uncultured	48	51	101	27	4	20	45	27	42	52	62
OTU_1700	Bacteria	Actinobacteriota	Thermoleophilia	Solirubrobacterales	Solirubrobacteraceae	uncultured	0	0	0	3	0	0	0	0	0	0	0
OTU_1701	Bacteria	Actinobacteriota	Actinobacteria	Micromonosporales	Micromonosporaceae	Allocatelliglobosispora	0	0	0	3	0	0	0	0	0	0	0
OTU_1702	Bacteria	Proteobacteria	Alphaproteobacteria	Rhizobiales	Rhizobiaceae	Phyllobacterium	0	0	0	3	0	0	0	0	0	0	0
OTU_1703	Bacteria	Proteobacteria	Alphaproteobacteria	Acetobacterales	Acetobacteraceae	Roseomonas	0	0	0	3	0	0	0	0	0	0	0
OTU_1704	Bacteria	Armatimonadota	Chthonomonadetes	Chthonomonadales	Chthonomonadales	Chthonomonadales	0	0	0	3	0	0	0	0	0	0	0
OTU_1705	Bacteria	Actinobacteriota	Thermoleophilia	Solirubrobacterales	Solirubrobacteraceae	JCM_18997	0	0	0	3	0	0	0	0	0	0	0
OTU_1706	Bacteria	Proteobacteria	Alphaproteobacteria	Acetobacterales	Acetobacteraceae	Acidiphilium	0	0	0	0	3	0	0	0	0	0	0
OTU_1707	Bacteria	Verrucomicrobiota	Verrucomicrobiae	S-BQ2-57_soil_group	S-BQ2-57_soil_group	-	0	0	0	0	3	0	0	0	0	0	0
OTU_1708	Bacteria	Bacteroidota	Bacteroidia	Chitinophagales	Chitinophagaceae	Flavisolibacter	0	0	0	0	3	0	0	0	0	0	0
OTU_1709	Bacteria	Proteobacteria	Alphaproteobacteria	Rhizobiales	Rhizobiales_Incertae_Sedis	Bauldia	0	0	0	0	3	0	0	0	0	0	0
OTU_171	Bacteria	Bacteroidota	Bacteroidia	Bacteroidales	M2PB4-65_termite_group	M2PB4-65_termite_group	46	38	146	17	97	6	246	257	478	732	889
OTU_1710	Bacteria	Planctomycetota	Planctomycetes	Planctomycetales	uncultured	uncultured	0	0	0	0	3	0	0	0	0	0	0
OTU_1711	Bacteria	Firmicutes	Bacilli	Thermoactinomycetales	Thermoactinomycetaceae	Kroppenstedtia	0	0	0	0	0	0	3	0	0	0	0
OTU_1712	Bacteria	Armatimonadota	Fimbriimonadia	Fimbriimonadales	Fimbriimonadaceae	Fimbriimonas	0	0	0	0	3	0	0	0	0	0	0
OTU_1713	Bacteria	Proteobacteria	Gammaproteobacteria	Cellvibrionales	Cellvibrionaceae	Cellvibrio	0	0	0	0	0	0	0	3	0	0	0
OTU_1714	Bacteria	Proteobacteria	Alphaproteobacteria	Azospirillales	uncultured	uncultured	0	0	0	3	0	0	0	0	0	0	0
OTU_1715	Bacteria	Fibrobacterota	Fibrobacteria	Fibrobacterales	Fibrobacteraceae	-	0	0	0	0	0	0	0	0	0	0	3
OTU_1716	Bacteria	Verrucomicrobiota	Verrucomicrobiae	Chthoniobacterales	Chthoniobacteraceae	Chthoniobacter	0	0	0	0	0	0	0	0	0	3	0
OTU_1717	Bacteria	Acidobacteriota	Holophagae	Holophagales	Holophagaceae	uncultured	0	0	0	0	0	0	0	0	3	0	0
OTU_1718	Bacteria	Chloroflexi	Ktedonobacteria	Ktedonobacterales	Ktedonobacteraceae	1921-3	0	0	0	0	0	0	0	0	3	0	0
OTU_1719	Bacteria	Actinobacteriota	Thermoleophilia	Gaiellales	uncultured	uncultured	0	0	0	0	0	0	0	3	0	0	0
OTU_172	Bacteria	Bacteroidota	Bacteroidia	Bacteroidales	Dysgonomonadaceae	uncultured	44	145	105	10	5	0	37	26	20	32	73
OTU_1720	Bacteria	Firmicutes	Clostridia	Thermincolales	Thermincolaceae	Thermincola	0	0	0	0	0	0	3	0	0	0	0
OTU_1721	Bacteria	Verrucomicrobiota	Verrucomicrobiae	Chthoniobacterales	Terrimicrobiaceae	Terrimicrobium	0	0	0	0	0	3	0	0	0	0	0
OTU_1722	Bacteria	Actinobacteriota	Actinobacteria	Pseudonocardiales	Pseudonocardiaceae	Pseudonocardiaceae	0	0	0	0	0	0	3	0	0	0	0
OTU_1723	Bacteria	Bacteroidota	Bacteroidia	Chitinophagales	Chitinophagaceae	Flavisolibacter	0	0	0	0	0	0	3	0	0	0	0
OTU_1724	Bacteria	Firmicutes	Bacilli	Paenibacillales	Paenibacillaceae	Paenibacillus	0	0	0	0	0	3	0	0	0	0	0
OTU_1725	Bacteria	Chloroflexi	Chloroflexia	Thermomicrobiales	JG30-KF-CM45	-	0	0	0	0	0	3	0	0	0	0	0
OTU_1726	Bacteria	Proteobacteria	Alphaproteobacteria	uncultured	uncultured	uncultured	0	0	0	0	0	3	0	0	0	0	0
OTU_1727	Bacteria	Chloroflexi	Ktedonobacteria	Ktedonobacterales	JG30-KF-AS9	-	0	0	0	0	0	3	0	0	0	0	0
OTU_1728	Bacteria	Firmicutes	Bacilli	Bacillales	Bacillaceae	Bacillus	0	0	0	3	0	0	0	0	0	0	0
OTU_1729	Bacteria	Cyanobacteria	Cyanobacteriia	Cyanobacteriales	Chroococcidiopsaceae	uncultured	0	3	0	0	0	0	0	0	0	0	0
OTU_173	Bacteria	Desulfobacterota	Desulfarculia	Desulfarculales	Desulfarculales	Desulfarculales	44	21	21	4	0	2	12	0	50	16	116
OTU_1730	Bacteria	Actinobacteriota	Actinobacteria	Pseudonocardiales	Pseudonocardiaceae	Prauserella	0	0	0	3	0	0	0	0	0	0	0
OTU_174	Bacteria	Actinobacteriota	Actinobacteria	Streptosporangiales	Thermomonosporaceae	Actinoallomurus	42	0	106	350	41	442	190	83	144	8	14
OTU_1742	Bacteria	Firmicutes	Bacilli	Lactobacillales	Lactobacillaceae	Lactobacillus	0	0	3	0	0	0	0	0	0	0	0
OTU_175	Bacteria	Firmicutes	Bacilli	Paenibacillales	Paenibacillaceae	Paenibacillus	41	215	79	1597	76	261	33	70	12	5	15
OTU_1750	Bacteria	Acidobacteriota	Holophagae	Subgroup_7	Subgroup_7	Subgroup_7	0	0	3	0	0	0	0	0	0	0	0
OTU_1751	Bacteria	Firmicutes	Bacilli	Brevibacillales	Brevibacillaceae	Brevibacillus	0	3	0	0	0	0	0	0	0	0	0
OTU_1752	Bacteria	Actinobacteriota	Acidimicrobiia	Microtrichales	Ilumatobacteraceae	-	0	0	3	0	0	0	0	0	0	0	0
OTU_1753	Bacteria	Verrucomicrobiota	Verrucomicrobiae	Methylacidiphilales	Methylacidiphilaceae	uncultured	0	0	3	0	0	0	0	0	0	0	0
OTU_1754	Bacteria	Acidobacteriota	Vicinamibacteria	Vicinamibacterales	uncultured	uncultured	0	0	3	0	0	0	0	0	0	0	0
OTU_1755	Bacteria	Verrucomicrobiota	Verrucomicrobiae	Opitutales	-	-	0	0	3	0	0	0	0	0	0	0	0
OTU_1756	Bacteria	Planctomycetota	Planctomycetes	Gemmatales	Gemmataceae	uncultured	0	3	0	0	0	0	0	0	0	0	0
OTU_1757	Bacteria	Chloroflexi	Anaerolineae	Caldilineales	Caldilineaceae	Litorilinea	0	3	0	0	0	0	0	0	0	0	0
OTU_1758	Bacteria	Firmicutes	Clostridia	Clostridiales	Clostridiaceae	Clostridium_sensu_stricto_19	0	3	0	0	0	0	0	0	0	0	0
OTU_176	Bacteria	Cyanobacteria	Vampirivibrionia	Gastranaerophilales	Gastranaerophilales	Gastranaerophilales	41	61	10	0	0	0	33	11	23	24	17
OTU_1765	Bacteria	Planctomycetota	Planctomycetes	Planctomycetales	Rubinisphaeraceae	Planctomicrobium	0	0	2	0	0	0	0	0	0	0	0
OTU_1766	Bacteria	Actinobacteriota	Thermoleophilia	Solirubrobacterales	-	-	0	0	2	0	0	0	0	0	0	0	0
OTU_1767	Bacteria	Verrucomicrobiota	Verrucomicrobiae	Chthoniobacterales	Xiphinematobacteraceae	Candidatus_Xiphinematobacter	0	0	2	0	0	0	0	0	0	0	0
OTU_1768	Bacteria	GAL15	-	-	-	-	0	2	0	0	0	0	0	0	0	0	0
OTU_1769	Bacteria	Bdellovibrionota	Bdellovibrionia	Bdellovibrionales	Bdellovibrionaceae	Bdellovibrio	0	2	0	0	0	0	0	0	0	0	0
OTU_177	Bacteria	Patescibacteria	Gracilibacteria	-	-	-	41	33	0	20	7	0	10	12	0	0	0
OTU_1770	Bacteria	Proteobacteria	Alphaproteobacteria	Rhizobiales	Beijerinckiaceae	Camelimonas	0	0	0	2	0	0	0	0	0	0	0
OTU_1772	Bacteria	Proteobacteria	Alphaproteobacteria	Tistrellales	Geminicoccaceae	Candidatus_Alysiosphaera	0	0	0	2	0	0	0	0	0	0	0
OTU_1773	Bacteria	Proteobacteria	Gammaproteobacteria	Burkholderiales	Alcaligenaceae	Pigmentiphaga	0	0	0	0	2	0	0	0	0	0	0
OTU_1774	Bacteria	Myxococcota	Polyangia	Polyangiales	Sandaracinaceae	Sandaracinus	0	0	0	2	0	0	0	0	0	0	0
OTU_1775	Bacteria	Actinobacteriota	Actinobacteria	Corynebacteriales	Segniliparaceae	Segniliparus	0	0	0	2	0	0	0	0	0	0	0
OTU_1776	Bacteria	Firmicutes	Bacilli	Aneurinibacillales	Aneurinibacillaceae	Aneurinibacillus	0	0	0	0	2	0	0	0	0	0	0
OTU_1777	Bacteria	Proteobacteria	Alphaproteobacteria	Rhodospirillales	Magnetospirillaceae	Magnetospirillum	0	0	0	0	2	0	0	0	0	0	0
OTU_1778	Bacteria	Actinobacteriota	Actinobacteria	Glycomycetales	Glycomycetaceae	Glycomyces	0	0	0	0	0	2	0	0	0	0	0
OTU_1779	Bacteria	Proteobacteria	Alphaproteobacteria	Micropepsales	Micropepsaceae	Micropepsaceae	0	0	0	0	0	2	0	0	0	0	0
OTU_178	Bacteria	Desulfobacterota	Desulfovibrionia	Desulfovibrionales	Desulfovibrionaceae	Desulfovibrio	40	29	0	0	11	67	6	4	21	30	64
OTU_1780	Bacteria	Chloroflexi	Chloroflexia	Kallotenuales	AKIW781	-	0	0	0	0	0	2	0	0	0	0	0
OTU_1781	Bacteria	Chloroflexi	Ktedonobacteria	Ktedonobacterales	Ktedonobacteraceae	1921-2	0	0	0	0	0	2	0	0	0	0	0
OTU_1782	Bacteria	Planctomycetota	Planctomycetes	Pirellulales	Pirellulaceae	Termite_planctomycete_cluster	0	0	0	0	0	0	2	0	0	0	0
OTU_1783	Bacteria	Chloroflexi	Ktedonobacteria	Ktedonobacterales	Ktedonobacteraceae	HSB_OF53-F07	0	0	0	0	0	0	0	0	2	0	0
OTU_179	Bacteria	Patescibacteria	Saccharimonadia	Saccharimonadales	Saccharimonadales	Saccharimonadales	40	291	180	0	27	0	491	108	47	84	104
OTU_18	Bacteria	Bacteroidota	Bacteroidia	Bacteroidales	Tannerellaceae	Tannerella	2863	7138	3342	254	430	3952	5119	2076	1812	2760	3442
OTU_180	Bacteria	Firmicutes	Clostridia	Oscillospirales	Oscillospiraceae	Sporobacter	40	74	0	0	40	0	0	39	0	0	0
OTU_181	Bacteria	Proteobacteria	Alphaproteobacteria	Rhizobiales	Xanthobacteraceae	uncultured	39	194	1062	481	392	2982	2055	1326	5492	4154	2447
OTU_1811	Bacteria	Bacteroidota	Bacteroidia	Bacteroidales	Rikenellaceae	SP3-e08	0	0	0	0	0	0	0	0	0	0	2
OTU_182	Bacteria	Actinobacteriota	Actinobacteria	Streptosporangiales	Thermomonosporaceae	Actinomadura	39	178	0	1613	10	1543	10505	156	0	4	0
OTU_183	Bacteria	Verrucomicrobiota	Verrucomicrobiae	Chthoniobacterales	Chthoniobacteraceae	Candidatus_Udaeobacter	37	328	868	357	281	348	48	425	5	5	7
OTU_184	Bacteria	Firmicutes	Clostridia	Lachnospirales	Lachnospiraceae	Anaerocolumna	37	140	117	103	340	0	13	31	0	0	50
OTU_186	Bacteria	Desulfobacterota	Desulfovibrionia	Desulfovibrionales	Desulfovibrionaceae	uncultured	37	75	5	3	0	0	4	12	35	27	49
OTU_187	Bacteria	Actinobacteriota	Actinobacteria	Corynebacteriales	Mycobacteriaceae	Mycobacterium	36	664	1175	1957	316	2811	649	343	151	63	10
OTU_188	Bacteria	Bacteroidota	Bacteroidia	Bacteroidales	Rs-E47_termite_group	-	35	0	52	7	22	0	32	97	8	54	46
OTU_189	Bacteria	Firmicutes	Clostridia	Oscillospirales	UCG-010	-	35	0	0	0	0	203	0	3	3	0	262
OTU_19	Bacteria	Bacteroidota	Bacteroidia	Bacteroidales	Tannerellaceae	Tannerella	2795	3927	455	11	178	256	1278	823	446	1510	5499
OTU_190	Bacteria	Firmicutes	Clostridia	Peptococcales	Peptococcaceae	uncultured	34	34	0	0	8	0	0	0	0	0	0
OTU_191	Bacteria	Firmicutes	Clostridia	Peptostreptococcales-Tissierellales	Anaerovoracaceae	Anaerovorax	34	8	0	0	0	0	8	0	10	0	0
OTU_192	Bacteria	Firmicutes	Negativicutes	Veillonellales-Selenomonadales	-	-	33	37	53	272	8	74	22	120	182	213	63
OTU_193	Bacteria	Bacteroidota	Bacteroidia	Bacteroidales	Bacteroidetes_vadinHA17	Bacteroidetes_vadinHA17	33	56	56	4	29	0	9	9	13	26	22
OTU_194	Bacteria	Chloroflexi	Dehalococcoidia	vadinBA26	-	-	32	175	92	112	0	23	206	93	94	138	0
OTU_195	Bacteria	Actinobacteriota	Actinobacteria	Micromonosporales	Micromonosporaceae	-	31	95	1572	590	244	3085	1402	58	745	23	0
OTU_196	Bacteria	Firmicutes	-	-	-	-	30	103	26	606	29	172	104	41	153	109	162
OTU_197	Bacteria	Actinobacteriota	Actinobacteria	Micrococcales	Microbacteriaceae	-	30	101	292	56	13	0	551	21	864	6	6
OTU_198	Bacteria	Bacteroidota	Bacteroidia	Bacteroidales	Rikenellaceae	M2PB4-61_termite_group	30	82	20	13	0	7	50	51	16	36	44
OTU_199	Bacteria	Actinobacteriota	Thermoleophilia	Gaiellales	uncultured	uncultured	28	186	125	229	163	1102	113	121	66	39	64
OTU_2	Bacteria	Firmicutes	Clostridia	Oscillospirales	Oscillospiraceae	-	38918	9501	6032	11179	2937	6545	10932	6170	7418	10302	8337
OTU_20	Bacteria	Synergistota	Synergistia	Synergistales	Synergistaceae	-	2486	4104	10496	4819	894	13167	5244	4111	9585	8167	4791
OTU_200	Bacteria	Actinobacteriota	Actinobacteria	Pseudonocardiales	Pseudonocardiaceae	-	28	163	0	119	40	103	174	50	0	0	0
OTU_201	Bacteria	Acidobacteriota	Holophagae	Holophagales	Holophagaceae	uncultured	28	0	0	0	0	0	0	0	0	17	0
OTU_202	Bacteria	Patescibacteria	Gracilibacteria	Absconditabacteriales_(SR1)	Absconditabacteriales_(SR1)	Absconditabacteriales_(SR1)	25	12	0	177	0	96	84	144	0	0	0
OTU_203	Bacteria	Firmicutes	Bacilli	Erysipelotrichales	Erysipelotrichaceae	ZOR0006	25	647	2747	1269	26	153	796	1337	1204	644	3206
OTU_204	Bacteria	Patescibacteria	Gracilibacteria	Candidatus_Peregrinibacteria	Candidatus_Peregrinibacteria	Candidatus_Peregrinibacteria	24	0	0	13	0	0	0	0	0	0	0
OTU_205	Bacteria	Firmicutes	Negativicutes	Veillonellales-Selenomonadales	Sporomusaceae	Dendrosporobacter	22	343	91	0	4	0	31	80	0	0	0
OTU_206	Bacteria	Firmicutes	Clostridia	Oscillospirales	UCG-010	-	22	90	12	0	6	18	5	9	27	28	13
OTU_207	Bacteria	Firmicutes	Negativicutes	Veillonellales-Selenomonadales	Sporomusaceae	Pelosinus	22	51	87	44	0	0	8	13	0	0	27
OTU_208	Bacteria	Spirochaetota	Spirochaetia	Spirochaetales	Spirochaetaceae	uncultured	21	55	24	0	6	0	29	97	72	262	504
OTU_209	Bacteria	Firmicutes	Clostridia	Clostridiales	Clostridiaceae	Candidatus_Arthromitus	20	238	171	102	53	17	364	101	87	24	132
OTU_21	Bacteria	Proteobacteria	Alphaproteobacteria	Rickettsiales	Anaplasmataceae	Wolbachia	2479	138	0	20	81	0	0	15	0	572	0
OTU_210	Bacteria	Firmicutes	Clostridia	Monoglobales	Monoglobaceae	Monoglobus	20	104	45	23	0	48	51	48	120	33	128
OTU_211	Bacteria	Actinobacteriota	Actinobacteria	Propionibacteriales	Nocardioidaceae	Kribbella	20	105	11	607	58	958	51	52	0	0	0
OTU_212	Bacteria	Patescibacteria	Gracilibacteria	Gracilibacteria	Gracilibacteria	Gracilibacteria	20	551	23	0	30	0	201	86	0	8	0
OTU_213	Bacteria	Firmicutes	Clostridia	Christensenellales	Christensenellaceae	Christensenellaceae_R-7_group	20	0	0	389	8	15	0	0	0	0	0
OTU_214	Bacteria	Armatimonadota	uncultured	uncultured	uncultured	uncultured	20	143	37	62	44	38	37	14	21	6	24
OTU_215	Bacteria	Spirochaetota	Leptospirae	Leptospirales	Leptospiraceae	Rs-H88_termite_group	20	36	18	7	7	5	40	10	17	25	25
OTU_216	Bacteria	Actinobacteriota	Actinobacteria	Streptosporangiales	Thermomonosporaceae	Actinomadura	19	80	30	62	377	901	30	0	3	0	0
OTU_217	Bacteria	Actinobacteriota	Actinobacteria	Corynebacteriales	Nocardiaceae	Gordonia	19	300	0	38	24	4	161	50	0	0	0
OTU_218	Bacteria	Elusimicrobiota	Endomicrobia	Endomicrobiales	Endomicrobiaceae	Endomicrobium	19	17	371	0	0	0	28	19	0	52	7
OTU_219	Bacteria	Firmicutes	Bacilli	Paenibacillales	Paenibacillaceae	Paenibacillus	19	86	10	77	0	0	8	12	0	0	0
OTU_22	Bacteria	Synergistota	Synergistia	Synergistales	Synergistaceae	uncultured	2469	5017	2742	5207	948	883	2540	3693	7561	5668	4295
OTU_220	Bacteria	Patescibacteria	Saccharimonadia	Saccharimonadales	Saccharimonadales	Saccharimonadales	18	44	901	1347	32	0	273	108	215	79	43
OTU_221	Bacteria	Proteobacteria	Alphaproteobacteria	Rhizobiales	Beijerinckiaceae	Methylobacterium-Methylorubrum	18	26	0	39	172	9	71	45	12	13	4
OTU_222	Bacteria	Bacteroidota	Bacteroidia	Bacteroidales	vadinHA21	-	17	0	172	0	28	0	35	153	122	176	1382
OTU_223	Bacteria	Verrucomicrobiota	Verrucomicrobiae	Chthoniobacterales	Chthoniobacteraceae	-	16	327	706	1327	35	307	610	130	23	142	0
OTU_224	Bacteria	Elusimicrobiota	Elusimicrobia	Elusimicrobiales	Elusimicrobiaceae	Elusimicrobium	16	88	479	6	94	0	146	132	84	331	32
OTU_225	Bacteria	Actinobacteriota	Thermoleophilia	Gaiellales	-	-	16	64	56	124	144	863	42	66	0	0	0
OTU_226	Bacteria	Cyanobacteria	Vampirivibrionia	Gastranaerophilales	Gastranaerophilales	Gastranaerophilales	16	0	0	0	0	0	0	0	0	0	0
OTU_227	Bacteria	Bacteroidota	Bacteroidia	Bacteroidales	Paludibacteraceae	H1	16	0	0	0	0	0	0	0	0	0	0
OTU_228	Bacteria	Bacteroidota	Bacteroidia	Bacteroidales	Rikenellaceae	M2PB4-61_termite_group	15	0	211	22	9	3	5	6	30	55	0
OTU_229	Bacteria	Spirochaetota	Spirochaetia	Spirochaetales	Spirochaetaceae	Sediminispirochaeta	15	6	10	0	7	0	32	21	26	29	53
OTU_23	Bacteria	Spirochaetota	Spirochaetia	Spirochaetales	Spirochaetaceae	Termite_Treponema_cluster	2451	852	2705	9	720	12	1769	17688	6311	15662	13589
OTU_230	Bacteria	Proteobacteria	Gammaproteobacteria	Burkholderiales	Comamonadaceae	Comamonas	14	21	13	10	43	9	9	0	0	0	21
OTU_231	Bacteria	Bacteroidota	Bacteroidia	Bacteroidales	Dysgonomonadaceae	uncultured	14	43	61	0	17	18	13	4	11	6	121
OTU_232	Bacteria	Actinobacteriota	Actinobacteria	Propionibacteriales	Propionibacteriaceae	Aestuariimicrobium	14	0	0	0	7	0	0	0	0	0	0
OTU_233	Bacteria	Firmicutes	Clostridia	Oscillospirales	Butyricicoccaceae	UCG-009	13	69	37	76	25	210	125	36	17	27	60
OTU_234	Bacteria	Firmicutes	Clostridia	Lachnospirales	Defluviitaleaceae	Defluviitaleaceae_UCG-011	13	7	0	8	0	0	0	0	8	0	0
OTU_235	Bacteria	Actinobacteriota	Actinobacteria	Micrococcales	Microbacteriaceae	Curtobacterium	13	44	0	0	43	0	0	11	0	0	12
OTU_236	Bacteria	Cyanobacteria	Cyanobacteriia	Chloroplast	Chloroplast	Chloroplast	12	0	0	0	0	7	0	0	0	0	0
OTU_237	Bacteria	Firmicutes	Negativicutes	Veillonellales-Selenomonadales	Sporomusaceae	Anaerosinus	12	97	41	7	0	0	21	63	11	0	105
OTU_239	Bacteria	Desulfobacterota	-	-	-	-	12	12	0	4	0	0	7	0	4	6	0
OTU_24	Bacteria	Firmicutes	Desulfotomaculia	Desulfotomaculales	Desulfotomaculales	Pelotomaculum	2264	10642	1128	1527	1717	5385	1924	4731	7163	8606	3641
OTU_240	Bacteria	Firmicutes	Moorellia	Desulfitibacterales	Desulfitibacteraceae	Desulfitibacter	12	5	0	103	0	27	0	13	34	21	0
OTU_241	Bacteria	Acidobacteriota	Blastocatellia	-	-	-	11	174	113	968	62	1033	16	42	0	0	0
OTU_242	Bacteria	Chloroflexi	Ktedonobacteria	Ktedonobacterales	Ktedonobacteraceae	HSB_OF53-F07	11	16	31	16	9	288	4	29	7	3	0
OTU_243	Bacteria	Desulfobacterota	Syntrophia	Syntrophales	Syntrophaceae	Syntrophus	11	99	52	42	0	0	77	133	126	128	214
OTU_244	Bacteria	Proteobacteria	Alphaproteobacteria	Rickettsiales	uncultured	uncultured	11	68	51	4	17	13	27	0	0	41	33
OTU_245	Bacteria	Spirochaetota	Spirochaetia	Spirochaetales	Spirochaetaceae	Sediminispirochaeta	11	26	42	0	9	0	77	57	9	27	107
OTU_246	Bacteria	Chloroflexi	Ktedonobacteria	Ktedonobacterales	Ktedonobacteraceae	uncultured	11	33	20	91	0	156	5	18	0	14	0
OTU_247	Bacteria	Verrucomicrobiota	Verrucomicrobiae	Chthoniobacterales	Chthoniobacteraceae	LD29	11	0	0	0	0	0	0	0	0	0	0
OTU_248	Bacteria	Firmicutes	Clostridia	Christensenellales	Christensenellaceae	uncultured	10	419	110	866	299	636	176	68	195	179	75
OTU_249	Bacteria	Actinobacteriota	Actinobacteria	Streptosporangiales	Thermomonosporaceae	-	10	340	488	741	73	2435	521	75	0	0	0
OTU_25	Bacteria	Firmicutes	Clostridia	Christensenellales	Christensenellaceae	Christensenellaceae_R-7_group	1987	3823	2054	6061	2367	21044	2599	1470	2064	1729	1809
OTU_250	Bacteria	Firmicutes	Clostridia	Christensenellales	Christensenellaceae	Christensenellaceae_R-7_group	10	22	15	47	13	346	80	62	39	43	115
OTU_251	Bacteria	Cyanobacteria	Vampirivibrionia	Gastranaerophilales	Gastranaerophilales	Gastranaerophilales	10	10	33	0	0	9	26	79	114	111	421
OTU_252	Bacteria	Margulisbacteria	Margulisbacteria	Margulisbacteria	Margulisbacteria	Margulisbacteria	10	14	10	0	17	0	21	140	366	238	92
OTU_253	Bacteria	Verrucomicrobiota	Verrucomicrobiae	Chthoniobacterales	Chthoniobacteraceae	Candidatus_Udaeobacter	10	45	259	94	126	150	6	99	0	0	0
OTU_254	Bacteria	Planctomycetota	vadinHA49	-	-	-	10	22	17	10	8	6	46	13	42	38	36
OTU_255	Bacteria	Actinobacteriota	Actinobacteria	Streptosporangiales	Streptosporangiaceae	Nonomuraea	10	12	0	36	0	317	5	0	0	0	0
OTU_256	Bacteria	Actinobacteriota	Actinobacteria	Micrococcales	Beutenbergiaceae	Salana	10	8	0	0	0	0	0	0	0	0	4
OTU_257	Bacteria	Firmicutes	Clostridia	Clostridia_UCG-014	-	-	9	430	103	19	58	320	455	173	488	153	473
OTU_258	Bacteria	Fibrobacterota	Fibrobacteria	Fibrobacterales	Fibrobacterales	Chitinispirillum	9	65	0	0	0	0	0	10	0	0	0
OTU_259	Bacteria	Bacteroidota	Bacteroidia	Bacteroidales	Paludibacteraceae	uncultured	9	0	58	89	5	296	34	134	242	184	129
OTU_26	Bacteria	Planctomycetota	Planctomycetes	Pirellulales	Pirellulaceae	Termite_planctomycete_cluster	1681	8209	14056	15278	2472	16878	7620	11833	12396	11526	2007
OTU_260	Bacteria	Firmicutes	Clostridia	Oscillospirales	Butyricicoccaceae	UCG-009	9	18	29	33	33	68	67	40	57	46	38
OTU_261	Bacteria	Firmicutes	Clostridia	Oscillospirales	uncultured	uncultured	9	104	22	87	18	78	82	15	38	84	38
OTU_262	Bacteria	Bacteroidota	Bacteroidia	Bacteroidales	Rs-E47_termite_group	-	9	0	0	0	0	0	20	8	0	9	11
OTU_263	Bacteria	Desulfobacterota	Desulfuromonadia	Geobacterales	Geobacteraceae	Geobacter	9	195	0	0	74	0	0	0	0	28	0
OTU_264	Bacteria	Proteobacteria	Gammaproteobacteria	Gammaproteobacteria_Incertae_Sedis	Unknown_Family	Acidibacter	8	7	852	12	10	270	1178	1139	2612	2259	1178
OTU_265	Bacteria	Verrucomicrobiota	Verrucomicrobiae	Chthoniobacterales	Chthoniobacteraceae	Chthoniobacter	8	135	167	133	33	82	121	24	21	5	0
OTU_266	Bacteria	Verrucomicrobiota	Kiritimatiellae	WCHB1-41	-	-	8	19	0	0	4	142	0	6	0	2	0
OTU_267	Bacteria	Firmicutes	Negativicutes	Acidaminococcales	Acidaminococcaceae	uncultured	8	14	0	6	13	0	49	11	14	15	11
OTU_268	Bacteria	Proteobacteria	Alphaproteobacteria	Rhizobiales	Rhizobiaceae	Allorhizobium-Neorhizobium-Pararhizobium-Rhizobium	8	0	0	125	26	34	0	2	0	0	0
OTU_269	Bacteria	Actinobacteriota	Actinobacteria	Micrococcales	Intrasporangiaceae	-	8	25	0	171	72	435	381	78	10	0	0
OTU_27	Bacteria	Firmicutes	Clostridia	Lachnospirales	Lachnospiraceae	Tyzzerella	1648	2455	357	914	255	1754	1399	571	1732	1144	1310
OTU_270	Bacteria	Actinobacteriota	Actinobacteria	Pseudonocardiales	Pseudonocardiaceae	Actinomycetospora	8	11	0	76	56	138	33	31	0	0	0
OTU_271	Bacteria	Chloroflexi	KD4-96	-	-	-	8	0	20	29	24	51	4	6	6	0	0
OTU_272	Bacteria	Actinobacteriota	Actinobacteria	Micrococcales	Promicromonosporaceae	Cellulosimicrobium	8	38	0	126	12	0	0	0	0	0	0
OTU_273	Bacteria	Hydrogenedentes	Hydrogenedentia	Hydrogenedentiales	Hydrogenedensaceae	Hydrogenedensaceae	8	6	11	0	0	0	11	10	0	0	13
OTU_274	Bacteria	Firmicutes	Bacilli	Bacillales	Bacillaceae	Terribacillus	8	19	0	5	0	0	0	0	0	0	0
OTU_275	Bacteria	Proteobacteria	Gammaproteobacteria	Burkholderiales	Oxalobacteraceae	uncultured	8	0	0	0	0	0	0	0	0	0	0
OTU_276	Bacteria	Acidobacteriota	Acidobacteriae	Acidobacteriales	uncultured	uncultured	7	0	23	29	77	107	0	15	31	102	95
OTU_277	Bacteria	Proteobacteria	Gammaproteobacteria	Burkholderiales	Burkholderiaceae	Burkholderia-Caballeronia-Paraburkholderia	7	28	32	11	138	73	19	21	25	19	132
OTU_278	Bacteria	Firmicutes	Bacilli	Bacillales	Planococcaceae	Lysinibacillus	7	66	15	158	9390	145	418	15	0	0	0
OTU_279	Bacteria	Firmicutes	Clostridia	Clostridia	Hungateiclostridiaceae	uncultured	7	205	15	19	21	177	200	20	80	81	152
OTU_28	Bacteria	Actinobacteriota	Coriobacteriia	Coriobacteriales	-	-	1523	467	3207	124	230	0	1747	389	614	577	1022
OTU_280	Bacteria	Chloroflexi	Ktedonobacteria	Ktedonobacterales	Ktedonobacteraceae	Ktedonobacter	7	80	57	204	42	794	12	41	0	41	5
OTU_281	Bacteria	Actinobacteriota	Actinobacteria	Streptomycetales	Streptomycetaceae	Kitasatospora	7	0	21	348	259	163	0	11	0	0	0
OTU_282	Bacteria	Desulfobacterota	Desulfovibrionia	Desulfovibrionales	Desulfovibrionaceae	-	7	0	6	0	10	0	3	11	22	42	66
OTU_283	Bacteria	Proteobacteria	Alphaproteobacteria	Rhizobiales	Hyphomicrobiaceae	Pedomicrobium	7	31	10	167	26	441	0	0	0	0	0
OTU_284	Bacteria	Firmicutes	Bacilli	Erysipelotrichales	-	-	7	7	77	34	7	0	292	42	36	47	0
OTU_285	Bacteria	Proteobacteria	Alphaproteobacteria	Rhodospirillales	uncultured	uncultured	7	4	125	2	3	19	41	13	0	32	11
OTU_286	Bacteria	Firmicutes	Bacilli	Erysipelotrichales	Erysipelotrichaceae	Turicibacter	7	69	6	60	21	10	19	12	0	0	0
OTU_287	Bacteria	Actinobacteriota	Actinobacteria	Pseudonocardiales	Pseudonocardiaceae	Amycolatopsis	7	272	9	0	0	0	22	15	0	0	0
OTU_288	Bacteria	Firmicutes	Bacilli	RF39	-	-	7	29	0	0	4	0	33	0	4	0	7
OTU_289	Bacteria	Patescibacteria	Saccharimonadia	Saccharimonadales	Saccharimonadaceae	TM7a	7	0	15	5	5	17	8	14	0	0	0
OTU_29	Bacteria	Rs-K70_termite_group	Rs-K70_termite_group	Rs-K70_termite_group	Rs-K70_termite_group	-	1498	788	1048	57	391	24	1681	1300	3035	3258	4235
OTU_290	Bacteria	Patescibacteria	Gracilibacteria	JGI_0000069-P22	-	-	7	0	0	0	0	0	0	0	0	5	0
OTU_291	Bacteria	Bdellovibrionota	Oligoflexia	0319-6G20	-	-	6	4	8	19	8	5	2	0	0	0	0
OTU_292	Bacteria	Chloroflexi	Ktedonobacteria	Ktedonobacterales	Ktedonobacteraceae	uncultured	6	17	3	39	0	199	6	6	0	4	0
OTU_293	Bacteria	Firmicutes	Clostridia	Oscillospirales	Ruminococcaceae	Ruminococcus	6	169	69	21	18	8	91	120	119	59	78
OTU_294	Bacteria	Firmicutes	Clostridia	Oscillospirales	Oscillospiraceae	Papillibacter	6	38	6	0	24	37	49	3	9	27	41
OTU_295	Bacteria	Fibrobacterota	Fibrobacteria	Fibrobacterales	uncultured	uncultured	6	6	9	0	21	0	11	87	264	249	216
OTU_296	Bacteria	Proteobacteria	Gammaproteobacteria	Burkholderiales	Rhodocyclaceae	uncultured	6	23	2	33	0	0	29	6	24	0	0
OTU_297	Bacteria	Firmicutes	Clostridia	Monoglobales	Monoglobaceae	Monoglobus	6	25	50	72	7	22	74	11	45	14	13
OTU_298	Bacteria	Actinobacteriota	Actinobacteria	Micrococcales	Microbacteriaceae	Leifsonia	6	45	0	125	22	0	16	14	0	0	0
OTU_299	Bacteria	Verrucomicrobiota	Kiritimatiellae	WCHB1-41	-	-	6	18	6	72	0	66	7	6	17	5	3
OTU_3	Bacteria	Bacteroidota	Bacteroidia	Bacteroidales	Dysgonomonadaceae	Candidatus_Symbiothrix	32419	16624	18106	1005	1782	1936	18215	10925	13690	10505	15997
OTU_30	Bacteria	Patescibacteria	Saccharimonadia	Saccharimonadales	Saccharimonadaceae	Candidatus_Saccharimonas	1467	4455	1972	856	2229	1108	1836	3035	913	1636	721
OTU_300	Bacteria	Bacteroidota	Bacteroidia	Bacteroidales	3M1PL1-52_termite_group	-	6	0	0	0	17	7	0	27	0	0	0
OTU_301	Bacteria	Proteobacteria	Alphaproteobacteria	Rhizobiales	Rhizobiaceae	Ochrobactrum	6	46	0	25	0	0	27	0	0	0	0
OTU_302	Bacteria	Synergistota	Synergistia	Synergistales	Synergistaceae	uncultured	6	0	0	0	0	0	0	0	0	0	0
OTU_303	Bacteria	Firmicutes	Negativicutes	Veillonellales-Selenomonadales	Sporomusaceae	Anaerospora	6	9	0	0	0	0	0	0	0	0	0
OTU_304	Bacteria	Spirochaetota	Leptospirae	Leptospirales	Leptospiraceae	Rs-H88_termite_group	6	18	0	0	0	0	0	0	0	0	0
OTU_305	Bacteria	Proteobacteria	Gammaproteobacteria	Xanthomonadales	Xanthomonadaceae	Stenotrophomonas	5	497	11	0	94	8	5	80	4	0	16
OTU_306	Bacteria	Acidobacteriota	Subgroup_5	Subgroup_5	Subgroup_5	Subgroup_5	5	39	264	62	11	136	0	20	0	0	0
OTU_307	Bacteria	Verrucomicrobiota	Verrucomicrobiae	Chthoniobacterales	Xiphinematobacteraceae	Candidatus_Xiphinematobacter	5	11	0	9	61	95	0	22	0	0	0
OTU_308	Bacteria	Actinobacteriota	Actinobacteria	Pseudonocardiales	Pseudonocardiaceae	Pseudonocardia	5	23	32	465	37	1138	142	24	17	17	0
OTU_309	Bacteria	Firmicutes	Syntrophomonadia	Syntrophomonadales	Syntrophomonadaceae	Syntrophomonas	5	6	0	18	0	134	0	0	6	0	0
OTU_31	Bacteria	Firmicutes	Clostridia	Lachnospirales	Lachnospiraceae	Lachnoclostridium	1466	495	275	220	0	9	56	99	122	19	121
OTU_310	Bacteria	Actinobacteriota	Actinobacteria	Pseudonocardiales	Pseudonocardiaceae	Amycolatopsis	5	32	0	287	15	180	18	14	0	2	4
OTU_311	Bacteria	Proteobacteria	Alphaproteobacteria	Rhizobiales	Methyloligellaceae	-	5	19	9	20	18	124	2	8	0	0	0
OTU_312	Bacteria	Actinobacteriota	Actinobacteria	Micromonosporales	Micromonosporaceae	Micromonospora	5	0	0	0	14	63	0	4	0	0	0
OTU_313	Bacteria	Actinobacteriota	Actinobacteria	Propionibacteriales	Nocardioidaceae	Aeromicrobium	5	10	0	6	0	0	0	0	0	0	0
OTU_314	Bacteria	Actinobacteriota	Actinobacteria	Micrococcales	Intrasporangiaceae	Terrabacter	5	9	0	8	0	0	0	0	0	0	0
OTU_315	Bacteria	Acidobacteriota	Vicinamibacteria	Vicinamibacterales	uncultured	uncultured	5	0	0	0	10	6	0	0	0	0	0
OTU_316	Bacteria	Myxococcota	Polyangia	MSB-4B10	-	-	5	0	0	0	0	0	0	0	0	0	0
OTU_317	Bacteria	Firmicutes	Desulfotomaculia	Desulfotomaculales	Desulfotomaculales	Pelotomaculum	4	0	0	0	0	0	0	0	0	0	3
OTU_318	Bacteria	Firmicutes	Desulfitobacteriia	Desulfitobacteriales	uncultured	uncultured	4	1743	1128	690	114	2048	840	2385	1024	705	1843
OTU_319	Bacteria	Proteobacteria	Gammaproteobacteria	Burkholderiales	Rhodocyclaceae	-	4	0	34	407	31	716	2434	73	66	8	2
OTU_32	Bacteria	Firmicutes	Negativicutes	Veillonellales-Selenomonadales	Sporomusaceae	Sporomusa	1414	78	95	311	77	42	31	786	7	17	12
OTU_320	Bacteria	Chloroflexi	Ktedonobacteria	Ktedonobacterales	Ktedonobacteraceae	-	4	87	101	220	19	293	7	43	54	18	0
OTU_321	Bacteria	Proteobacteria	Gammaproteobacteria	Burkholderiales	Alcaligenaceae	Achromobacter	4	3	0	0	5	0	0	0	0	0	0
OTU_322	Bacteria	Actinobacteriota	Actinobacteria	Corynebacteriales	Nocardiaceae	Rhodococcus	4	67	0	94	18	132	257	0	0	0	0
OTU_323	Bacteria	Desulfobacterota	Desulfovibrionia	Desulfovibrionales	Desulfovibrionaceae	Desulfovibrio	4	2	175	0	0	0	135	174	249	495	365
OTU_324	Bacteria	Firmicutes	Clostridia	Lachnospirales	Defluviitaleaceae	Defluviitaleaceae_UCG-011	4	63	2	6	0	31	12	6	22	8	39
OTU_325	Bacteria	Firmicutes	Clostridia	Oscillospirales	Oscillospiraceae	Papillibacter	4	5	0	0	3	27	0	0	8	6	23
OTU_326	Bacteria	Bacteroidota	Bacteroidia	Bacteroidales	3M1PL1-52_termite_group	-	4	0	7	0	5	0	5	34	27	27	0
OTU_327	Bacteria	Verrucomicrobiota	Verrucomicrobiae	Chthoniobacterales	Xiphinematobacteraceae	Candidatus_Xiphinematobacter	4	47	43	12	33	72	15	80	18	8	0
OTU_328	Bacteria	Myxococcota	Myxococcia	Myxococcales	Myxococcaceae	-	4	3	26	41	0	32	4	6	0	0	0
OTU_329	Bacteria	Firmicutes	Bacilli	Paenibacillales	Paenibacillaceae	Paenibacillus	4	10	4	63	9	56	4	6	0	0	0
OTU_33	Bacteria	Firmicutes	Clostridia	Peptostreptococcales-Tissierellales	Anaerovoracaceae	Anaerovorax	1369	1476	876	1128	272	1638	1330	976	1432	1496	1723
OTU_330	Bacteria	Chloroflexi	Ktedonobacteria	Ktedonobacterales	Ktedonobacteraceae	HSB_OF53-F07	4	14	0	15	0	107	0	0	0	0	0
OTU_331	Bacteria	Proteobacteria	Alphaproteobacteria	Rhizobiales	Labraceae	Labrys	4	0	2	0	22	0	3	5	0	0	0
OTU_332	Bacteria	Actinobacteriota	Thermoleophilia	Solirubrobacterales	Solirubrobacteraceae	Conexibacter	4	0	0	20	0	0	0	0	0	0	0
OTU_333	Bacteria	Bacteroidota	Bacteroidia	Sphingobacteriales	-	-	4	0	0	0	0	0	0	0	0	0	0
OTU_334	Bacteria	Proteobacteria	Gammaproteobacteria	Burkholderiales	Rhodocyclaceae	Propionivibrio	4	0	0	0	0	0	0	0	0	0	0
OTU_335	Bacteria	Proteobacteria	Gammaproteobacteria	Legionellales	Legionellaceae	Legionella	3	8	10	4	11	13	0	3	0	0	10
OTU_336	Bacteria	Proteobacteria	Alphaproteobacteria	-	-	-	3	0	0	0	4	0	9	2	0	0	0
OTU_337	Bacteria	Proteobacteria	Gammaproteobacteria	Diplorickettsiales	Diplorickettsiaceae	Aquicella	3	0	0	2	0	6	0	0	0	0	0
OTU_338	Bacteria	Planctomycetota	Phycisphaerae	Tepidisphaerales	WD2101_soil_group	-	3	19	50	162	36	64	27	32	2	0	0
OTU_339	Bacteria	Bacteroidota	Bacteroidia	Bacteroidales	3M1PL1-52_termite_group	-	3	0	16	0	31	9	4	0	76	48	144
OTU_34	Bacteria	Firmicutes	Bacilli	Erysipelotrichales	Erysipelotrichaceae	ZOR0006	1272	1775	2875	63	256	64	4503	2654	1920	1870	4953
OTU_340	Bacteria	Actinobacteriota	Thermoleophilia	Solirubrobacterales	Solirubrobacteraceae	Solirubrobacter	3	0	29	304	66	661	342	0	0	0	5
OTU_341	Bacteria	Proteobacteria	Gammaproteobacteria	Legionellales	Legionellaceae	Legionella	3	0	0	0	0	0	0	0	0	0	0
OTU_342	Bacteria	Actinobacteriota	Actinobacteria	Micrococcales	Dermabacteraceae	Brachybacterium	3	4	0	0	0	0	0	0	0	0	0
OTU_343	Bacteria	Actinobacteriota	Thermoleophilia	Gaiellales	uncultured	uncultured	3	72	14	0	24	0	44	14	18	10	14
OTU_344	Bacteria	Verrucomicrobiota	Chlamydiae	Chlamydiales	Parachlamydiaceae	Neochlamydia	3	4	5	0	0	0	0	0	0	0	0
OTU_345	Bacteria	Proteobacteria	Alphaproteobacteria	uncultured	uncultured	uncultured	3	0	0	23	0	27	0	3	0	0	0
OTU_346	Bacteria	Planctomycetota	Planctomycetes	Isosphaerales	Isosphaeraceae	Singulisphaera	3	0	0	0	0	0	0	0	0	0	0
OTU_347	Bacteria	Actinobacteriota	Thermoleophilia	Solirubrobacterales	Solirubrobacteraceae	uncultured	2	11	0	0	55	147	0	0	7	13	0
OTU_348	Bacteria	Myxococcota	Polyangia	Haliangiales	Haliangiaceae	Haliangium	2	4	277	35	20	64	41	0	55	145	0
OTU_349	Bacteria	Firmicutes	Clostridia	Oscillospirales	Ruminococcaceae	uncultured	2	33	0	30	20	393	141	21	133	77	12
OTU_35	Bacteria	Firmicutes	Clostridia	Oscillospirales	[Eubacterium]_coprostanoligenes_group	[Eubacterium]_coprostanoligenes_group	1247	2601	2568	1464	1380	2991	4808	1967	4204	3313	4569
OTU_350	Bacteria	Patescibacteria	Saccharimonadia	Saccharimonadales	LWQ8	-	2	0	46	88	9	38	93	16	2	0	0
OTU_351	Bacteria	Verrucomicrobiota	Verrucomicrobiae	Opitutales	Opitutaceae	Ereboglobus	2	5	16	3	11	61	58	11	71	129	78
OTU_352	Bacteria	Proteobacteria	Gammaproteobacteria	Xanthomonadales	Rhodanobacteraceae	Dyella	2	0	0	0	0	0	0	0	0	0	0
OTU_353	Bacteria	Bacteroidota	Bacteroidia	Chitinophagales	Chitinophagaceae	Puia	2	0	0	0	0	0	0	0	0	0	0
OTU_354	Bacteria	Acidobacteriota	Vicinamibacteria	Vicinamibacterales	Vicinamibacteraceae	Vicinamibacteraceae	2	7	31	51	27	62	0	19	0	0	0
OTU_355	Bacteria	Bacteroidota	Bacteroidia	Bacteroidales	Marinilabiliaceae	uncultured	2	0	0	0	0	0	2	8	35	67	0
OTU_356	Bacteria	Proteobacteria	Gammaproteobacteria	Burkholderiales	SC-I-84	-	2	0	0	0	8	0	0	0	0	0	0
OTU_357	Bacteria	Firmicutes	Clostridia	Clostridiales	Clostridiaceae	Clostridium_sensu_stricto_3	2	11	0	34	0	9	0	0	0	0	0
OTU_358	Bacteria	Verrucomicrobiota	Chlamydiae	Chlamydiales	Simkaniaceae	uncultured	2	15	2	0	0	0	0	0	0	0	0
OTU_359	Bacteria	Firmicutes	Bacilli	Exiguobacterales	Exiguobacteraceae	Exiguobacterium	2	29	0	0	0	0	0	0	0	0	0
OTU_36	Bacteria	Desulfobacterota	Desulfovibrionia	Desulfovibrionales	Desulfovibrionaceae	Desulfovibrio	1187	617	599	367	248	475	933	657	2175	1828	2192
OTU_360	Bacteria	Chloroflexi	Chloroflexia	Chloroflexales	Roseiflexaceae	uncultured	2	0	0	0	0	0	0	0	0	0	0
OTU_361	Bacteria	Desulfobacterota	Desulfuromonadia	Bradymonadales	Bradymonadales	Bradymonadales	2	9	0	0	0	0	0	0	0	0	0
OTU_362	Bacteria	Actinobacteriota	Thermoleophilia	Gaiellales	uncultured	uncultured	2	0	0	0	0	4	0	0	0	0	0
OTU_363	Bacteria	Patescibacteria	Saccharimonadia	Saccharimonadales	Saccharimonadaceae	GTL1	2	0	0	0	0	0	0	0	0	0	0
OTU_364	Bacteria	Bacteroidota	Bacteroidia	Chitinophagales	Chitinophagaceae	Parafilimonas	2	0	0	0	0	0	0	0	0	0	0
OTU_365	Bacteria	Proteobacteria	Alphaproteobacteria	Acetobacterales	Acetobacteraceae	-	0	12	4	26	29	191	83	18	316	55	82
OTU_367	Bacteria	Actinobacteriota	Actinobacteria	Micrococcales	Sanguibacteraceae	Sanguibacter	0	346	592	13	303	0	603	741	2334	377	3249
OTU_368	Bacteria	Planctomycetota	Planctomycetes	Gemmatales	Gemmataceae	uncultured	0	14	166	171	122	742	8	13	0	0	0
OTU_37	Bacteria	Firmicutes	Clostridia	Monoglobales	Monoglobaceae	Monoglobus	1151	1470	696	860	96	1940	1177	643	746	730	957
OTU_370	Bacteria	Proteobacteria	Alphaproteobacteria	Rhizobiales	Beijerinckiaceae	Roseiarcus	0	0	35	0	0	0	0	0	0	0	3
OTU_371	Bacteria	Acidobacteriota	Acidobacteriae	Acidobacteriales	Acidobacteriaceae_(Subgroup_1)	-	0	3	7	0	0	0	0	0	0	0	7
OTU_372	Bacteria	Actinobacteriota	Thermoleophilia	Solirubrobacterales	Solirubrobacteraceae	Conexibacter	0	169	177	286	200	1938	389	19	102	129	12
OTU_373	Bacteria	Actinobacteriota	Actinobacteria	Frankiales	Acidothermaceae	Acidothermus	0	29	50	227	160	2459	187	47	179	334	132
OTU_374	Bacteria	Verrucomicrobiota	Verrucomicrobiae	Chthoniobacterales	Chthoniobacteraceae	Chthoniobacter	0	403	337	570	14	588	351	126	64	26	147
OTU_375	Bacteria	Proteobacteria	Gammaproteobacteria	Pseudomonadales	Moraxellaceae	Acinetobacter	0	3	0	16	0	0	352	0	0	0	0
OTU_376	Bacteria	Actinobacteriota	Acidimicrobiia	IMCC26256	-	-	0	7	39	13	0	112	87	22	539	940	171
OTU_377	Bacteria	Actinobacteriota	Actinobacteria	Frankiales	Acidothermaceae	Acidothermus	0	0	0	0	10	68	0	0	0	33	17
OTU_378	Bacteria	WPS-2	-	-	-	-	0	0	0	0	0	0	0	0	2	0	0
OTU_379	Bacteria	Acidobacteriota	Acidobacteriae	Solibacterales	Solibacteraceae	Candidatus_Solibacter	0	13	57	20	15	59	0	0	22	58	0
OTU_38	Bacteria	Firmicutes	Clostridia	Christensenellales	Christensenellaceae	Christensenellaceae_R-7_group	1150	933	213	266	927	1040	304	213	186	362	527
OTU_380	Bacteria	Proteobacteria	Alphaproteobacteria	Rhizobiales	Xanthobacteraceae	-	0	12	2895	168	10	334	12	70	738	136	18
OTU_381	Bacteria	Acidobacteriota	Acidobacteriae	Acidobacteriales	Acidobacteriaceae_(Subgroup_1)	Edaphobacter	0	2	0	0	6	7	0	0	4	0	0
OTU_382	Bacteria	Firmicutes	Clostridia	Peptostreptococcales-Tissierellales	Peptostreptococcaceae	Paeniclostridium	0	13	191	357	50394	52	20	0	0	0	0
OTU_383	Bacteria	Verrucomicrobiota	Verrucomicrobiae	Chthoniobacterales	Xiphinematobacteraceae	Candidatus_Xiphinematobacter	0	266	369	375	0	361	100	191	285	222	5
OTU_384	Bacteria	Chloroflexi	AD3	-	-	-	0	27	25	557	53	12945	2847	169	7	0	0
OTU_385	Bacteria	Firmicutes	Bacilli	Lactobacillales	Streptococcaceae	Streptococcus	0	17	5	0	0	0	0	0	0	0	0
OTU_387	Bacteria	Actinobacteriota	Acidimicrobiia	IMCC26256	-	-	0	0	5	0	0	0	7	0	52	64	0
OTU_388	Bacteria	Synergistota	Synergistia	Synergistales	Synergistaceae	Syner-01	0	0	0	0	0	1735	0	0	0	0	0
OTU_389	Bacteria	Acidobacteriota	Acidobacteriae	Solibacterales	Solibacteraceae	Candidatus_Solibacter	0	0	0	0	4	0	6	0	0	0	0
OTU_390	Bacteria	Actinobacteriota	Thermoleophilia	Solirubrobacterales	Solirubrobacteraceae	Conexibacter	0	4	23	85	107	884	44	45	8	0	0
OTU_391	Bacteria	Actinobacteriota	Actinobacteria	Micrococcales	Microbacteriaceae	Gryllotalpicola	0	0	1049	8	18	0	1055	702	3979	1126	376
OTU_393	Bacteria	Actinobacteriota	Acidimicrobiia	IMCC26256	-	-	0	5	30	90	67	505	145	42	210	413	66
OTU_394	Bacteria	Firmicutes	Bacilli	Lactobacillales	Enterococcaceae	Enterococcus	0	48	323	237	24426	293	5	5	0	17	0
OTU_395	Bacteria	Proteobacteria	Alphaproteobacteria	Elsterales	uncultured	uncultured	0	0	133	15	17	106	5	3	0	0	0
OTU_396	Bacteria	Firmicutes	Bacilli	Lactobacillales	Streptococcaceae	Streptococcus	0	44	10	0	0	0	0	0	0	0	0
OTU_397	Bacteria	Verrucomicrobiota	Chlamydiae	Chlamydiales	Parachlamydiaceae	Neochlamydia	0	0	0	0	0	3	0	0	0	0	0
OTU_398	Bacteria	Actinobacteriota	Actinobacteria	Frankiales	Acidothermaceae	Acidothermus	0	0	0	0	0	23	0	0	0	0	0
OTU_399	Bacteria	Proteobacteria	Gammaproteobacteria	-	-	-	0	0	4	3	3	0	3	0	0	0	0
OTU_4	Bacteria	Firmicutes	Clostridia	Lachnospirales	Lachnospiraceae	-	25514	8973	33444	1155	1830	10731	6197	14981	10678	13693	22376
OTU_40	Bacteria	Actinobacteriota	Actinobacteria	Micrococcales	-	-	1077	15728	32808	2571	17190	1982	11485	52808	45552	34974	35684
OTU_400	Bacteria	Proteobacteria	Alphaproteobacteria	Sphingomonadales	Sphingomonadaceae	Sphingomonas	0	10	44	54	180	36	224	22	0	0	6
OTU_401	Bacteria	Acidobacteriota	Blastocatellia	-	-	-	0	124	4309	1044	38	442	1610	483	409	642	110
OTU_403	Bacteria	Planctomycetota	Planctomycetes	Isosphaerales	Isosphaeraceae	Aquisphaera	0	0	0	34	0	27	0	0	0	0	0
OTU_404	Bacteria	Bacteroidota	Bacteroidia	Bacteroidales	Dysgonomonadaceae	Candidatus_Armantifilum	0	331	35	100	8	362	135	36	6	254	0
OTU_405	Bacteria	Planctomycetota	Planctomycetes	Gemmatales	Gemmataceae	Gemmata	0	0	0	0	15	3	0	0	0	0	0
OTU_406	Bacteria	Actinobacteriota	Actinobacteria	Frankiales	Acidothermaceae	Acidothermus	0	0	0	16	3	124	0	0	0	53	0
OTU_407	Bacteria	Acidobacteriota	Acidobacteriae	Acidobacteriales	Acidobacteriaceae_(Subgroup_1)	Occallatibacter	0	4	0	0	0	5	0	0	0	0	0
OTU_408	Bacteria	Actinobacteriota	Coriobacteriia	OPB41	-	-	0	4	0	519	9	3585	48	2	0	0	0
OTU_409	Bacteria	Actinobacteriota	Actinobacteria	Frankiales	Acidothermaceae	Acidothermus	0	6	8	44	0	64	44	0	7	0	8
OTU_41	Bacteria	Actinobacteriota	Coriobacteriia	Coriobacteriales	Coriobacteriales_Incertae_Sedis	Raoultibacter	1043	3394	3279	144	695	0	3567	1098	704	470	590
OTU_410	Bacteria	Planctomycetota	Planctomycetes	Isosphaerales	Isosphaeraceae	-	0	0	8	87	19	259	2	0	0	0	0
OTU_412	Bacteria	Acidobacteriota	Acidobacteriae	Acidobacteriales	Acidobacteriaceae_(Subgroup_1)	Granulicella	0	0	0	0	0	0	6	0	0	0	0
OTU_413	Bacteria	Chloroflexi	Ktedonobacteria	Ktedonobacterales	Ktedonobacteraceae	Thermosporothrix	0	9	16	8	8	55	5	8	0	0	0
OTU_414	Bacteria	Firmicutes	Bacilli	Bacillales	-	-	0	0	0	104	0	445	10	0	0	0	0
OTU_416	Bacteria	Proteobacteria	Gammaproteobacteria	Burkholderiales	Comamonadaceae	Delftia	0	0	0	0	8	0	0	0	0	0	0
OTU_417	Bacteria	Firmicutes	Clostridia	Oscillospirales	Ruminococcaceae	Ruminococcaceae	0	37	0	0	0	404	5	0	0	0	0
OTU_418	Bacteria	Synergistota	Synergistia	Synergistales	Synergistaceae	Candidatus_Tammella	0	0	0	0	0	521	0	0	0	0	0
OTU_42	Bacteria	Firmicutes	Clostridia	Oscillospirales	Ruminococcaceae	Candidatus_Soleaferrea	1029	701	163	819	241	2795	270	136	238	282	177
OTU_421	Bacteria	Firmicutes	Negativicutes	Veillonellales-Selenomonadales	Veillonellaceae	Veillonella	0	19	37	0	0	0	0	3	0	0	0
OTU_422	Bacteria	Firmicutes	Bacilli	Staphylococcales	Staphylococcaceae	Staphylococcus	0	17	0	0	0	0	0	0	0	0	0
OTU_424	Bacteria	Verrucomicrobiota	Verrucomicrobiae	Chthoniobacterales	-	-	0	0	0	0	0	78	0	0	0	0	0
OTU_425	Bacteria	Verrucomicrobiota	Chlamydiae	Chlamydiales	Parachlamydiaceae	-	0	0	0	3	0	0	3	0	0	0	0
OTU_426	Bacteria	Bacteroidota	Bacteroidia	Bacteroidales	Dysgonomonadaceae	Candidatus_Armantifilum	0	20	15	105	3	385	0	11	0	0	2
OTU_427	Bacteria	Planctomycetota	Planctomycetes	Gemmatales	Gemmataceae	uncultured	0	7	21	0	60	123	0	8	0	0	0
OTU_429	Bacteria	Proteobacteria	Gammaproteobacteria	Pasteurellales	Pasteurellaceae	Haemophilus	0	21	10	0	0	0	0	0	0	0	0
OTU_43	Bacteria	Planctomycetota	Planctomycetes	Pirellulales	Pirellulaceae	Termite_planctomycete_cluster	993	4056	7654	5289	681	15956	4443	4705	4416	3413	2517
OTU_430	Bacteria	Proteobacteria	Alphaproteobacteria	Rhizobiales	Beijerinckiaceae	Roseiarcus	0	0	0	9	0	0	0	0	32	8	0
OTU_432	Bacteria	Bacteroidota	Bacteroidia	Sphingobacteriales	Sphingobacteriaceae	Sphingobacterium	0	0	0	0	0	0	0	0	0	0	3
OTU_433	Bacteria	Firmicutes	Negativicutes	Veillonellales-Selenomonadales	Sporomusaceae	uncultured	0	40	70	24	0	10	11	17	3	0	0
OTU_434	Bacteria	Actinobacteriota	Actinobacteria	Frankiales	Frankiaceae	Jatrophihabitans	0	15	208	473	125	3776	477	321	255	438	38
OTU_435	Bacteria	Actinobacteriota	Actinobacteria	Micrococcales	Micrococcaceae	Rothia	0	6	0	0	0	0	0	0	0	0	0
OTU_436	Bacteria	Proteobacteria	Alphaproteobacteria	Caulobacterales	Caulobacteraceae	Brevundimonas	0	0	0	0	3	0	0	0	0	0	0
OTU_437	Bacteria	Actinobacteriota	Coriobacteriia	Coriobacteriales	Coriobacteriales_Incertae_Sedis	uncultured	0	0	1299	530	0	0	1892	736	1092	579	883
OTU_438	Bacteria	WS4	-	-	-	-	0	0	0	0	0	12	0	0	0	0	0
OTU_439	Bacteria	Firmicutes	Clostridia	Peptococcales	Peptococcaceae	uncultured	0	191	61	215	69	999	88	29	85	54	6
OTU_44	Bacteria	Desulfobacterota	Desulfobulbia	Desulfobulbales	Desulfocapsaceae	Desulforhopalus	958	1401	675	569	343	0	1407	495	1728	1761	1784
OTU_440	Bacteria	Firmicutes	Bacilli	Lactobacillales	Carnobacteriaceae	Granulicatella	0	7	12	0	0	0	0	0	0	0	0
OTU_441	Bacteria	Firmicutes	Bacilli	Lactobacillales	Streptococcaceae	-	0	0	38	50	0	0	0	0	0	0	0
OTU_442	Bacteria	Proteobacteria	Gammaproteobacteria	Burkholderiales	Comamonadaceae	Aquabacterium	0	0	0	0	0	0	0	0	0	0	6
OTU_443	Bacteria	Proteobacteria	Alphaproteobacteria	Rhizobiales	Beijerinckiaceae	-	0	0	7	13	25	74	73	0	33	6	0
OTU_444	Bacteria	Actinobacteriota	Actinobacteria	Frankiales	Acidothermaceae	Acidothermus	0	0	12	95	44	965	47	0	30	73	6
OTU_445	Bacteria	Planctomycetota	Planctomycetes	Gemmatales	Gemmataceae	Gemmata	0	8	331	40	26	108	0	12	0	0	0
OTU_446	Bacteria	Actinobacteriota	Actinobacteria	Corynebacteriales	Nocardiaceae	Nocardia	0	121	0	82	6	450	55	18	47	31	22
OTU_448	Bacteria	Proteobacteria	Gammaproteobacteria	Diplorickettsiales	Diplorickettsiaceae	Aquicella	0	0	0	3	0	2	0	0	0	0	0
OTU_449	Bacteria	Chloroflexi	Ktedonobacteria	Ktedonobacterales	Ktedonobacteraceae	uncultured	0	16	48	180	28	366	14	41	29	8	2
OTU_45	Bacteria	Firmicutes	Clostridia	Eubacteriales	Anaerofustaceae	Anaerofustis	918	86	1196	0	201	0	769	313	50	85	542
OTU_450	Bacteria	Proteobacteria	Alphaproteobacteria	Caulobacterales	Caulobacteraceae	uncultured	0	0	5	2	3	0	0	0	0	3	0
OTU_451	Bacteria	Firmicutes	Bacilli	Erysipelotrichales	Erysipelotrichaceae	ZOR0006	0	935	619	0	89	0	0	199	199	240	0
OTU_452	Bacteria	Myxococcota	Polyangia	Polyangiales	Polyangiaceae	Pajaroellobacter	0	0	0	38	4	41	0	0	0	0	0
OTU_453	Bacteria	Actinobacteriota	Thermoleophilia	Solirubrobacterales	-	-	0	43	217	524	231	3511	153	44	1238	63	0
OTU_454	Bacteria	Chloroflexi	Ktedonobacteria	Ktedonobacterales	Ktedonobacterales	Ktedonobacterales	0	5	1634	172	10	581	24	15	8	2	0
OTU_455	Bacteria	Proteobacteria	Gammaproteobacteria	Enterobacterales	Enterobacteriaceae	Enterobacter	0	0	0	0	5892	0	0	0	0	0	0
OTU_457	Bacteria	Acidobacteriota	Acidobacteriae	Bryobacterales	Bryobacteraceae	Bryobacter	0	0	22	9	45	88	100	5	2	0	0
OTU_459	Bacteria	Actinobacteriota	Thermoleophilia	Solirubrobacterales	Solirubrobacteraceae	-	0	7	18	259	86	664	62	0	42	131	18
OTU_46	Bacteria	Actinobacteriota	Actinobacteria	Micrococcales	Promicromonosporaceae	-	906	5941	4650	10517	2971	366	6857	5424	2749	689	113
OTU_464	Bacteria	Firmicutes	Limnochordia	Limnochordia	Limnochordia	Hydrogenispora	0	6	5	8	0	9	0	0	0	0	0
OTU_466	Bacteria	Verrucomicrobiota	Verrucomicrobiae	Chthoniobacterales	Chthoniobacteraceae	LD29	0	3	17	57	0	0	0	0	0	0	0
OTU_467	Bacteria	Firmicutes	Clostridia	Oscillospirales	UCG-010	-	0	91	4	31	16	175	17	34	11	79	95
OTU_468	Bacteria	Firmicutes	Syntrophomonadia	Syntrophomonadales	Syntrophomonadaceae	Syntrophomonas	0	13	0	65	0	295	36	20	63	33	56
OTU_469	Bacteria	Proteobacteria	Gammaproteobacteria	Burkholderiales	Neisseriaceae	Neisseria	0	26	0	0	0	0	0	0	0	0	0
OTU_47	Bacteria	Firmicutes	Clostridia	Peptostreptococcales-Tissierellales	Anaerovoracaceae	-	904	1631	613	626	663	2997	1162	809	780	758	1004
OTU_470	Bacteria	Actinobacteriota	Actinobacteria	-	-	-	0	343	40	247	1406	205	288	302	74	149	28
OTU_471	Bacteria	Bacteroidota	Bacteroidia	Bacteroidales	Tannerellaceae	-	0	0	0	95	0	330	187	0	266	214	568
OTU_473	Bacteria	Actinobacteriota	Acidimicrobiia	-	-	-	0	0	867	7	5	96	20	0	0	0	0
OTU_474	Bacteria	Chloroflexi	AD3	-	-	-	0	0	7	0	28	175	21	0	2	0	4
OTU_475	Bacteria	Firmicutes	Clostridia	Lachnospirales	Lachnospiraceae	Robinsoniella	0	0	1245	0	0	0	223	29	460	121	132
OTU_476	Bacteria	Firmicutes	Sulfobacillia	Sulfobacillales	Sulfobacillaceae	uncultured	0	0	0	0	0	0	17	0	39	139	53
OTU_477	Bacteria	Chloroflexi	Ktedonobacteria	Ktedonobacterales	Ktedonobacteraceae	1959-1	0	5	7	18	3	37	11	0	4	3	0
OTU_478	Bacteria	Fibrobacterota	Chitinivibrionia	Chitinivibrionia_Incertae_Sedis	Unknown_Family	possible_genus_02	0	0	3	0	16	0	2	15	224	84	122
OTU_479	Bacteria	Planctomycetota	Planctomycetes	Gemmatales	Gemmataceae	Gemmata	0	0	7	8	0	11	0	6	0	0	0
OTU_48	Bacteria	Firmicutes	Clostridia	Lachnospirales	Lachnospiraceae	Lachnospiraceae_NC2004_group	888	1954	855	0	558	736	1872	931	948	827	373
OTU_480	Bacteria	Actinobacteriota	Acidimicrobiia	uncultured	uncultured	uncultured	0	0	3	0	0	0	6	0	0	0	0
OTU_481	Bacteria	Actinobacteriota	Actinobacteria	Micromonosporales	Micromonosporaceae	Actinocatenispora	0	32	10	307	12	1283	1881	4	8	233	5
OTU_482	Bacteria	Firmicutes	Clostridia	Clostridiales	Clostridiaceae	Clostridium_sensu_stricto_13	0	15	0	27	3116	38	31	0	0	0	0
OTU_484	Bacteria	Firmicutes	Bacilli	Lactobacillales	Leuconostocaceae	Weissella	0	5	0	0	0	100	0	0	0	0	0
OTU_485	Bacteria	Actinobacteriota	Actinobacteria	Catenulisporales	Actinospicaceae	Actinospica	0	2	0	0	0	0	0	0	0	0	0
OTU_487	Bacteria	Actinobacteriota	Actinobacteria	Catenulisporales	Catenulisporaceae	Catenulispora	0	0	13	6	3	356	6	0	18	32	3
OTU_488	Bacteria	Verrucomicrobiota	Chlamydiae	Chlamydiales	Chlamydiaceae	Chlamydiaceae	0	0	29	0	0	0	0	0	0	0	0
OTU_49	Bacteria	Firmicutes	Clostridia	Oscillospirales	Ruminococcaceae	Ruminococcaceae	845	2976	0	1206	112	821	228	406	413	68	11
OTU_490	Bacteria	Firmicutes	Desulfitobacteriia	Desulfitobacteriales	uncultured	uncultured	0	0	11	966	25	562	57	19	27	23	8
OTU_491	Bacteria	Proteobacteria	Gammaproteobacteria	Burkholderiales	Oxalobacteraceae	Massilia	0	0	6	24	30	10	0	8	0	0	0
OTU_493	Bacteria	Firmicutes	Clostridia	Christensenellales	Christensenellaceae	Christensenellaceae_R-7_group	0	150	100	38	300	395	251	67	253	139	340
OTU_494	Bacteria	Firmicutes	Negativicutes	Veillonellales-Selenomonadales	Sporomusaceae	Dendrosporobacter	0	19	0	99	0	89	12	13	178	103	2
OTU_495	Bacteria	Chloroflexi	TK10	-	-	-	0	13	42	112	36	727	14	0	0	0	0
OTU_496	Bacteria	Actinobacteriota	Actinobacteria	Frankiales	Acidothermaceae	Acidothermus	0	0	0	0	0	8	0	0	0	0	0
OTU_497	Bacteria	Fibrobacterota	Fibrobacteria	Fibrobacterales	Fibrobacteraceae	possible_genus_05	0	0	27	0	5	0	4	140	509	403	1979
OTU_5	Bacteria	Firmicutes	Clostridia	Oscillospirales	Oscillospiraceae	uncultured	11874	430	1123	4088	352	983	453	394	191	573	1047
OTU_50	Bacteria	Firmicutes	Bacilli	Lactobacillales	Streptococcaceae	Lactococcus	820	2606	312	859	1364	5	4774	3171	1781	5559	1845
OTU_500	Bacteria	Verrucomicrobiota	Chlamydiae	Chlamydiales	Parachlamydiaceae	Candidatus_Protochlamydia	0	0	0	0	0	2	0	0	0	0	0
OTU_501	Bacteria	Planctomycetota	Planctomycetes	Pirellulales	Pirellulaceae	uncultured	0	16	10	854	0	435	0	0	0	0	0
OTU_502	Bacteria	Firmicutes	Bacilli	Paenibacillales	Paenibacillaceae	Cohnella	0	85	0	1119	20	116	0	14	0	6	4
OTU_503	Bacteria	Bacteroidota	Bacteroidia	Bacteroidales	COB_P4-1_termite_group	COB_P4-1_termite_group	0	21	13	0	52	0	61	68	155	268	225
OTU_504	Bacteria	Actinobacteriota	Actinobacteria	Propionibacteriales	Nocardioidaceae	-	0	16	15	727	60	918	522	126	0	0	6
OTU_505	Bacteria	Firmicutes	Bacilli	RsaHf231	-	-	0	0	0	27	0	77	0	0	0	0	0
OTU_507	Bacteria	Verrucomicrobiota	Kiritimatiellae	WCHB1-41	-	-	0	57	301	103	18	27	322	150	488	200	300
OTU_508	Bacteria	Bacteroidota	Bacteroidia	Bacteroidales	Bacteroidetes_vadinHA17	Bacteroidetes_vadinHA17	0	0	241	0	0	0	65	158	217	326	207
OTU_509	Bacteria	Bacteroidota	Bacteroidia	Bacteroidales	Rikenellaceae	Alistipes	0	0	0	0	0	25	0	0	0	0	0
OTU_51	Bacteria	Firmicutes	Clostridia	Peptostreptococcales-Tissierellales	Anaerovoracaceae	uncultured	804	2604	2265	2547	1066	1098	3070	2097	1539	1351	1904
OTU_510	Bacteria	Firmicutes	Clostridia	Peptostreptococcales-Tissierellales	Anaerovoracaceae	uncultured	0	0	26	135	0	1054	11	0	0	0	18
OTU_511	Bacteria	Acidobacteriota	Vicinamibacteria	Vicinamibacterales	uncultured	uncultured	0	18	122	199	126	192	26	46	0	0	0
OTU_512	Bacteria	Proteobacteria	Gammaproteobacteria	Burkholderiales	Gallionellaceae	-	0	517	0	0	159	0	0	103	477	365	905
OTU_514	Bacteria	Proteobacteria	Gammaproteobacteria	Burkholderiales	Rhodocyclaceae	Dechloromonas	0	0	0	0	0	132	2389	0	0	0	0
OTU_518	Bacteria	Proteobacteria	Gammaproteobacteria	Pseudomonadales	Moraxellaceae	Cavicella	0	55	13	0	18	0	22	0	814	1023	516
OTU_52	Bacteria	Firmicutes	Clostridia	Oscillospirales	uncultured	uncultured	798	904	198	565	337	210	406	394	702	317	363
OTU_520	Bacteria	Firmicutes	Bacilli	-	-	-	0	0	0	146	0	44	21	0	0	0	0
OTU_521	Bacteria	Planctomycetota	Planctomycetes	Pirellulales	Pirellulaceae	uncultured	0	82	0	160	28	943	0	13	0	0	0
OTU_522	Bacteria	Bacteroidota	Bacteroidia	Bacteroidales	Paludibacteraceae	H1	0	0	118	0	0	0	134	156	118	198	1535
OTU_523	Bacteria	Firmicutes	Limnochordia	Limnochordia	Limnochordia	Hydrogenispora	0	8	21	9	0	0	0	0	0	0	0
OTU_524	Bacteria	Verrucomicrobiota	Verrucomicrobiae	Pedosphaerales	Pedosphaeraceae	uncultured	0	5	32	23	0	0	0	11	0	0	0
OTU_525	Bacteria	Spirochaetota	Spirochaetia	Spirochaetales	Spirochaetaceae	Treponema	0	0	0	22	0	3	0	0	0	22	15
OTU_527	Bacteria	Firmicutes	Negativicutes	-	-	-	0	0	0	0	3	0	0	0	0	14	0
OTU_529	Bacteria	Elusimicrobiota	Elusimicrobia	Elusimicrobiales	Elusimicrobiaceae	Elusimicrobium	0	9	170	8	69	0	5	56	27	75	0
OTU_53	Bacteria	Firmicutes	Bacilli	Lactobacillales	Leuconostocaceae	Leuconostoc	733	2338	186	27	278	0	191	1114	0	0	0
OTU_531	Bacteria	Actinobacteriota	Actinobacteria	Catenulisporales	Catenulisporaceae	Catenulispora	0	2	0	0	0	0	0	0	0	0	0
OTU_532	Bacteria	Proteobacteria	Gammaproteobacteria	Xanthomonadales	Rhodanobacteraceae	-	0	0	198	6	3	0	328	132	293	404	543
OTU_533	Bacteria	Bacteroidota	Bacteroidia	Bacteroidales	Rikenellaceae	Alistipes	0	10	15	31	0	89	38	14	69	85	133
OTU_536	Bacteria	Actinobacteriota	Actinobacteria	Frankiales	Acidothermaceae	Acidothermus	0	0	0	0	0	12	0	0	0	0	0
OTU_537	Bacteria	Firmicutes	Clostridia	Oscillospirales	uncultured	uncultured	0	68	9	0	0	84	7	27	21	11	12
OTU_538	Bacteria	Actinobacteriota	Actinobacteria	Micrococcales	Microbacteriaceae	Leucobacter	0	312	0	0	194	42	111	185	366	86	518
OTU_54	Bacteria	Bacteroidota	Bacteroidia	Bacteroidales	-	-	713	127	166	0	60	138	368	116	559	182	574
OTU_541	Bacteria	Bacteroidota	Bacteroidia	Flavobacteriales	Weeksellaceae	Chryseobacterium	0	412	0	0	30	0	0	25	0	0	0
OTU_545	Bacteria	Proteobacteria	Gammaproteobacteria	Enterobacterales	Enterobacteriaceae	-	0	0	59	41	756	0	0	0	0	0	0
OTU_546	Bacteria	Bacteroidota	Bacteroidia	Chitinophagales	Chitinophagaceae	-	0	0	51	0	5	0	61	88	191	120	813
OTU_547	Bacteria	Actinobacteriota	Thermoleophilia	Solirubrobacterales	-	-	0	0	0	15	0	0	0	0	0	0	8
OTU_548	Bacteria	Actinobacteriota	Actinobacteria	Streptomycetales	Streptomycetaceae	-	0	8	32	36	49	21	182	0	559	123	15
OTU_55	Bacteria	Spirochaetota	Spirochaetia	Spirochaetales	Spirochaetaceae	Termite_Treponema_cluster	707	105	400	5	77	0	124	3601	3749	4041	1655
OTU_550	Bacteria	Verrucomicrobiota	Verrucomicrobiae	Pedosphaerales	Pedosphaeraceae	-	0	0	0	11	0	8	0	0	0	0	0
OTU_551	Bacteria	Firmicutes	Clostridia	Clostridia	Hungateiclostridiaceae	Ruminiclostridium	0	15	17	26	0	0	6	12	16	3	17
OTU_552	Bacteria	Firmicutes	Desulfotomaculia	Desulfotomaculales	Desulfallas-Sporotomaculum	BRH-c8a	0	86	31	2	10	0	146	37	36	0	0
OTU_554	Bacteria	Proteobacteria	Gammaproteobacteria	Coxiellales	Coxiellaceae	Coxiella	0	0	5	0	0	2	0	0	0	0	0
OTU_555	Bacteria	Firmicutes	Clostridia	Oscillospirales	Ruminococcaceae	uncultured	0	10	28	4	0	190	15	17	45	21	249
OTU_556	Bacteria	Actinobacteriota	Actinobacteria	Frankiales	Frankiaceae	Frankia	0	0	0	96	28	1004	389	4	0	0	0
OTU_557	Bacteria	Bacteroidota	Bacteroidia	Bacteroidales	Williamwhitmaniaceae	uncultured	0	0	0	0	0	5	0	0	0	0	0
OTU_558	Bacteria	Firmicutes	Moorellia	Desulfitibacterales	Desulfitibacteraceae	Desulfitibacter	0	5	129	7	14	947	179	6	40	44	96
OTU_559	Bacteria	Firmicutes	Clostridia	Christensenellales	Christensenellaceae	Christensenellaceae	0	33	19	0	4	169	3	2	0	2	0
OTU_56	Bacteria	Firmicutes	Clostridia	Clostridia_vadinBB60_group	Clostridia_vadinBB60_group	Clostridia_vadinBB60_group	682	554	419	536	200	209	299	665	705	433	1174
OTU_561	Bacteria	Firmicutes	Clostridia	Lachnospirales	Lachnospiraceae	Tyzzerella	0	0	12	36	0	0	0	0	11	10	0
OTU_562	Bacteria	Firmicutes	Clostridia	Oscillospirales	Oscillospiraceae	uncultured	0	0	0	0	7	397	3	0	0	11	5
OTU_563	Bacteria	Proteobacteria	Gammaproteobacteria	Diplorickettsiales	Diplorickettsiaceae	uncultured	0	0	0	0	0	4	0	0	0	0	0
OTU_564	Bacteria	Firmicutes	Clostridia	Oscillospirales	Oscillospirales	Hydrogenoanaerobacterium	0	0	0	0	0	107	0	0	0	0	0
OTU_565	Bacteria	Patescibacteria	Saccharimonadia	Saccharimonadales	Saccharimonadaceae	Candidatus_Saccharimonas	0	48	16	18	27	10	48	34	13	38	0
OTU_566	Bacteria	Proteobacteria	Gammaproteobacteria	Burkholderiales	Comamonadaceae	Ottowia	0	0	163	0	0	0	0	398	231	166	395
OTU_568	Bacteria	Proteobacteria	Gammaproteobacteria	Burkholderiales	Rhodocyclaceae	Niveibacterium	0	0	0	0	0	0	1272	0	27	0	0
OTU_57	Bacteria	Spirochaetota	Spirochaetia	Spirochaetales	Spirochaetaceae	Termite_Treponema_cluster	678	589	2421	18	532	0	1041	14666	3776	8641	12177
OTU_571	Bacteria	Firmicutes	uncultured	uncultured	uncultured	uncultured	0	0	14	85	0	4	6	0	47	35	19
OTU_574	Bacteria	Planctomycetota	Planctomycetes	Pirellulales	Pirellulaceae	Pir3_lineage	0	0	0	0	10	76	0	0	0	0	0
OTU_575	Bacteria	Proteobacteria	Alphaproteobacteria	Rhizobiales	Rhodomicrobiaceae	Rhodomicrobium	0	0	0	0	4	19	0	0	0	0	0
OTU_576	Bacteria	Planctomycetota	Planctomycetes	Gemmatales	Gemmataceae	uncultured	0	0	0	0	2	16	0	0	0	0	0
OTU_577	Bacteria	Deferribacterota	Deferribacteres	Deferribacterales	Deferribacteraceae	Mucispirillum	0	0	0	0	0	5	0	0	9	0	21
OTU_578	Bacteria	Firmicutes	Clostridia	Peptostreptococcales-Tissierellales	Peptostreptococcaceae	Paraclostridium	0	0	0	0	0	0	21	0	0	0	0
OTU_579	Bacteria	Actinobacteriota	Actinobacteria	Micrococcales	Cellulomonadaceae	-	0	0	0	0	15	833	0	0	0	0	0
OTU_58	Bacteria	Firmicutes	Clostridia	Oscillospirales	Oscillospiraceae	uncultured	619	955	517	914	246	219	207	268	775	476	680
OTU_580	Bacteria	Actinobacteriota	Actinobacteria	Micrococcales	Micrococcaceae	Glutamicibacter	0	0	0	0	0	0	36	0	0	0	0
OTU_581	Bacteria	Fibrobacterota	Fibrobacteria	Fibrobacterales	Fibrobacteraceae	possible_genus_05	0	0	0	0	0	0	0	353	390	87	257
OTU_582	Bacteria	Actinobacteriota	Actinobacteria	Propionibacteriales	Nocardioidaceae	Nocardioides	0	0	0	12	0	0	0	0	0	0	0
OTU_583	Bacteria	Firmicutes	Bacilli	Bacillales	Planococcaceae	-	0	0	0	14	0	0	0	0	0	0	0
OTU_584	Bacteria	Planctomycetota	Phycisphaerae	Tepidisphaerales	WD2101_soil_group	-	0	7	40	33	39	61	60	19	2	2	0
OTU_586	Bacteria	Desulfobacterota	Desulfuromonadia	Geobacterales	Geobacteraceae	Geobacter	0	0	33	0	0	0	5	33	395	223	368
OTU_587	Bacteria	Proteobacteria	Gammaproteobacteria	Pseudomonadales	Moraxellaceae	Alkanindiges	0	0	0	0	0	0	8	0	0	0	0
OTU_588	Bacteria	Bacteroidota	Bacteroidia	Bacteroidales	M2PB4-65_termite_group	M2PB4-65_termite_group	0	0	0	0	0	4	25	0	0	0	0
OTU_589	Bacteria	Proteobacteria	Alphaproteobacteria	Rhizobiales	Hyphomicrobiaceae	Hyphomicrobium	0	0	0	4	12	0	0	0	0	0	0
OTU_59	Bacteria	Acidobacteriota	Subgroup_18	Subgroup_18	Subgroup_18	Subgroup_18	579	1333	5919	170	247	10	1583	5129	4657	3657	5627
OTU_591	Bacteria	Desulfobacterota	Desulfobulbia	Desulfobulbales	Desulfobulbaceae	Desulfobulbus	0	0	0	0	25	15	449	33	372	139	0
OTU_593	Bacteria	Planctomycetota	Planctomycetes	Isosphaerales	Isosphaeraceae	Singulisphaera	0	0	4	191	0	87	0	0	0	0	0
OTU_595	Bacteria	Firmicutes	Clostridia	Christensenellales	Christensenellaceae	Christensenellaceae_R-7_group	0	37	5	14	5	25	13	16	28	59	6
OTU_597	Bacteria	Planctomycetota	Phycisphaerae	Tepidisphaerales	CPla-3_termite_group	CPla-3_termite_group	0	135	26	157	15	136	68	27	4	0	0
OTU_598	Bacteria	Patescibacteria	Parcubacteria	Candidatus_Moranbacteria	Candidatus_Moranbacteria	Candidatus_Moranbacteria	0	0	208	120	32	267	206	137	0	24	0
OTU_6	Bacteria	Bacteroidota	Bacteroidia	Bacteroidales	Dysgonomonadaceae	Candidatus_Symbiothrix	8532	4200	2102	575	323	0	2844	3070	2567	2292	5130
OTU_60	Bacteria	Bacteroidota	Bacteroidia	Bacteroidales	Prolixibacteraceae	uncultured	565	330	854	24	176	41	289	324	1073	1071	805
OTU_600	Bacteria	Actinobacteriota	Coriobacteriia	Coriobacteriales	Coriobacteriales_Incertae_Sedis	uncultured	0	0	0	111	0	18	0	0	0	0	0
OTU_601	Bacteria	Firmicutes	Clostridia	Oscillospirales	Oscillospiraceae	NK4A214_group	0	18	0	7	0	161	0	0	0	0	0
OTU_602	Bacteria	Planctomycetota	Planctomycetes	Gemmatales	Gemmataceae	Gemmata	0	0	0	0	0	6	0	0	0	0	0
OTU_604	Bacteria	Firmicutes	Clostridia	Oscillospirales	UCG-010	-	0	41	11	58	7	53	9	3	6	7	11
OTU_606	Bacteria	Planctomycetota	vadinHA49	-	-	-	0	0	0	0	0	127	5	0	18	0	9
OTU_608	Bacteria	Firmicutes	Clostridia	Lachnospirales	Lachnospiraceae	[Eubacterium]_fissicatena_group	0	0	0	0	0	15	0	0	0	0	0
OTU_609	Bacteria	Firmicutes	Bacilli	Paenibacillales	Paenibacillaceae	Paenibacillus	0	29	0	746	0	61	0	0	4	0	0
OTU_61	Bacteria	Firmicutes	Clostridia	Oscillospirales	UCG-010	-	550	1435	211	1169	534	2066	668	314	685	805	463
OTU_611	Bacteria	Gemmatimonadota	Gemmatimonadetes	Gemmatimonadales	Gemmatimonadaceae	Gemmatimonas	0	0	0	14	5	14	3	0	0	0	0
OTU_612	Bacteria	Firmicutes	Clostridia	Clostridiales	Clostridiaceae	Clostridium_sensu_stricto_12	0	26	0	0	0	18	0	0	0	0	0
OTU_613	Bacteria	Planctomycetota	Planctomycetes	Isosphaerales	Isosphaeraceae	uncultured	0	0	0	12	2	35	0	0	0	0	0
OTU_614	Bacteria	Planctomycetota	Planctomycetes	Planctomycetales	Gimesiaceae	uncultured	0	0	3	0	0	0	0	0	0	0	0
OTU_615	Bacteria	Actinobacteriota	Actinobacteria	Propionibacteriales	Nocardioidaceae	Marmoricola	0	0	24	77	120	91	352	78	6	0	3
OTU_616	Bacteria	Verrucomicrobiota	Verrucomicrobiae	Chthoniobacterales	Terrimicrobiaceae	Terrimicrobium	0	0	5	8	0	0	0	8	0	0	0
OTU_618	Bacteria	Proteobacteria	Alphaproteobacteria	Acetobacterales	Acetobacteraceae	uncultured	0	0	0	0	0	5	0	0	20	181	0
OTU_619	Bacteria	Actinobacteriota	Actinobacteria	Frankiales	uncultured	uncultured	0	16	0	67	34	501	109	21	0	0	0
OTU_62	Bacteria	Firmicutes	Clostridia	Clostridia	Hungateiclostridiaceae	uncultured	545	1932	1316	275	279	1744	1705	705	2229	1838	2113
OTU_620	Bacteria	MBNT15	-	-	-	-	0	3	16	8	7	5	11	17	13	22	33
OTU_621	Bacteria	Proteobacteria	Gammaproteobacteria	Burkholderiales	Oxalobacteraceae	-	0	0	0	9	0	10	9	0	5	10	8
OTU_623	Bacteria	Firmicutes	Clostridia	Peptostreptococcales-Tissierellales	Peptostreptococcaceae	Romboutsia	0	0	4	0	18	0	69	0	0	0	0
OTU_624	Bacteria	Firmicutes	Bacilli	Erysipelotrichales	Erysipelotrichaceae	ZOR0006	0	0	0	0	0	6	0	0	0	0	0
OTU_625	Bacteria	Acidobacteriota	Vicinamibacteria	Vicinamibacterales	uncultured	uncultured	0	25	131	229	62	128	0	24	0	4	0
OTU_627	Bacteria	Firmicutes	Clostridia	Clostridiales	Clostridiaceae	Clostridium_sensu_stricto_9	0	5	0	0	4	0	0	0	0	0	0
OTU_629	Bacteria	Bacteroidota	Bacteroidia	Bacteroidales	Marinilabiliaceae	uncultured	0	0	0	0	0	0	25	381	37	111	151
OTU_63	Bacteria	Firmicutes	Clostridia	Clostridia_UCG-014	-	-	512	1532	248	94	246	297	829	817	333	138	299
OTU_630	Bacteria	Proteobacteria	Alphaproteobacteria	Rhodospirillales	uncultured	uncultured	0	0	7	0	7	0	0	78	20	26	83
OTU_632	Bacteria	Acidobacteriota	Subgroup_18	Subgroup_18	Subgroup_18	Subgroup_18	0	0	0	637	0	51	0	0	0	0	0
OTU_634	Bacteria	Planctomycetota	Planctomycetes	Pirellulales	Pirellulaceae	Pir3_lineage	0	50	0	144	0	0	0	11	0	0	0
OTU_636	Bacteria	Actinobacteriota	Thermoleophilia	Gaiellales	uncultured	uncultured	0	18	4	403	12	147	30	13	6	20	0
OTU_637	Bacteria	Firmicutes	Bacilli	Bacillales	Planococcaceae	Psychrobacillus	0	0	0	0	0	8	0	0	0	0	0
OTU_638	Bacteria	Planctomycetota	Planctomycetes	Gemmatales	Gemmataceae	Zavarzinella	0	0	68	51	124	367	5	26	4	4	0
OTU_64	Bacteria	Proteobacteria	Gammaproteobacteria	Burkholderiales	Comamonadaceae	-	465	4613	1160	3884	1710	4000	8142	4096	9145	5485	4832
OTU_640	Bacteria	Desulfobacterota	Desulfobulbia	Desulfobulbales	Desulfocapsaceae	Desulforhopalus	0	0	0	0	0	622	0	0	0	0	0
OTU_641	Bacteria	Actinobacteriota	Thermoleophilia	Solirubrobacterales	-	-	0	0	0	4	12	53	0	0	0	0	0
OTU_644	Bacteria	Bdellovibrionota	Bdellovibrionia	Bdellovibrionales	Bdellovibrionaceae	Bdellovibrio	0	6	0	0	2	113	0	3	0	0	0
OTU_646	Bacteria	Actinobacteriota	Actinobacteria	Frankiales	-	-	0	0	0	76	34	330	135	0	0	0	0
OTU_647	Bacteria	Firmicutes	Negativicutes	Veillonellales-Selenomonadales	Sporomusaceae	Sporomusa	0	26	31	27	11	5	0	9	0	0	0
OTU_648	Bacteria	Acidobacteriota	Acidobacteriae	Acidobacteriales	-	-	0	18	4	12	54	104	2	2	3	4	0
OTU_649	Bacteria	Bacteroidota	Bacteroidia	Bacteroidales	M2PB4-65_termite_group	M2PB4-65_termite_group	0	0	0	0	12	0	0	0	0	9	9
OTU_65	Bacteria	Actinobacteriota	Actinobacteria	Streptomycetales	Streptomycetaceae	Streptomyces	455	3469	494	9402	4406	4810	2792	1202	64	65	10
OTU_650	Bacteria	Actinobacteriota	Acidimicrobiia	IMCC26256	-	-	0	16	0	27	47	484	4	6	0	0	0
OTU_652	Bacteria	Verrucomicrobiota	Verrucomicrobiae	Chthoniobacterales	Chthoniobacteraceae	Candidatus_Udaeobacter	0	58	120	82	95	187	16	24	0	0	0
OTU_653	Bacteria	Firmicutes	Clostridia	Lachnospirales	Lachnospiraceae	Anaerocolumna	0	0	0	0	0	0	0	0	0	0	17
OTU_655	Bacteria	Dependentiae	Babeliae	Babeliales	Babeliaceae	Babeliaceae	0	0	0	0	0	2	0	0	0	0	0
OTU_657	Bacteria	Actinobacteriota	Thermoleophilia	Gaiellales	Gaiellaceae	Gaiella	0	19	22	27	43	342	25	32	0	0	0
OTU_658	Bacteria	Actinobacteriota	Actinobacteria	Catenulisporales	Catenulisporaceae	Catenulispora	0	0	0	0	0	12	0	0	0	0	0
OTU_66	Bacteria	Bacteroidota	Bacteroidia	Bacteroidales	Rikenellaceae	M2PB4-61_termite_group	452	394	422	110	75	37	449	422	541	807	920
OTU_660	Bacteria	Planctomycetota	Planctomycetes	Isosphaerales	Isosphaeraceae	uncultured	0	0	0	93	6	39	0	0	0	0	0
OTU_661	Bacteria	Actinobacteriota	Actinobacteria	Micromonosporales	Micromonosporaceae	Micromonospora	0	40	11	197	47	114	71	18	7	0	0
OTU_662	Bacteria	Firmicutes	Clostridia	Oscillospirales	Ruminococcaceae	Candidatus_Soleaferrea	0	0	0	0	0	26	0	0	0	0	0
OTU_664	Bacteria	Proteobacteria	Gammaproteobacteria	Burkholderiales	-	-	0	0	0	543	0	0	0	0	0	0	0
OTU_665	Bacteria	Actinobacteriota	Actinobacteria	Propionibacteriales	Nocardioidaceae	Nocardioides	0	0	0	0	0	0	542	0	0	0	0
OTU_666	Bacteria	Actinobacteriota	Actinobacteria	Micromonosporales	Micromonosporaceae	Dactylosporangium	0	29	0	41	55	260	23	9	0	0	0
OTU_667	Bacteria	Firmicutes	Clostridia	Lachnospirales	Lachnospiraceae	Anaerocolumna	0	40	0	33	0	0	0	0	0	0	0
OTU_67	Bacteria	Firmicutes	Bacilli	Bacillales	Bacillaceae	Bacillus	449	13137	1151	6314	60750	2837	2442	1730	70	1665	122
OTU_670	Bacteria	Actinobacteriota	Acidimicrobiia	Microtrichales	Iamiaceae	Iamia	0	11	47	103	25	123	145	60	0	8	0
OTU_671	Bacteria	Proteobacteria	Alphaproteobacteria	Caulobacterales	Caulobacteraceae	Phenylobacterium	0	8	0	100	23	26	4	0	3	0	0
OTU_673	Bacteria	Verrucomicrobiota	Verrucomicrobiae	Pedosphaerales	Pedosphaeraceae	ADurb.Bin063-1	0	0	0	5	0	0	5	0	0	0	0
OTU_676	Bacteria	Campilobacterota	Campylobacteria	Campylobacterales	Sulfurospirillaceae	Sulfurospirillum	0	0	510	0	0	0	0	0	0	0	0
OTU_677	Bacteria	Firmicutes	Clostridia	Oscillospirales	UCG-010	-	0	2	3	0	5	2	16	2	40	0	7
OTU_678	Bacteria	Chloroflexi	Ktedonobacteria	Ktedonobacterales	JG30-KF-AS9	-	0	0	0	9	15	140	0	0	0	0	0
OTU_68	Bacteria	Actinobacteriota	Coriobacteriia	Coriobacteriales	Coriobacteriales_Incertae_Sedis	uncultured	449	1062	409	0	387	1045	387	272	212	184	390
OTU_682	Bacteria	Firmicutes	Bacilli	Paenibacillales	Paenibacillaceae	Paenibacillus	0	0	0	106	0	29	0	7	0	0	5
OTU_683	Bacteria	Actinobacteriota	Actinobacteria	Micrococcales	Brevibacteriaceae	Brevibacterium	0	0	0	37	0	0	7	0	0	0	0
OTU_684	Bacteria	Chloroflexi	Ktedonobacteria	Ktedonobacterales	Ktedonobacteraceae	HSB_OF53-F07	0	0	5	0	14	133	0	6	14	4	0
OTU_685	Bacteria	Planctomycetota	Planctomycetes	Isosphaerales	Isosphaeraceae	Tundrisphaera	0	0	0	4	14	21	0	0	0	0	0
OTU_686	Bacteria	Proteobacteria	Alphaproteobacteria	Rhizobiales	Rhizobiaceae	-	0	34	7	143	11	178	30	4	0	5	0
OTU_688	Bacteria	Firmicutes	Clostridia	Clostridia	Hungateiclostridiaceae	Anaerobacterium	0	0	0	0	0	0	4	0	0	0	0
OTU_69	Bacteria	Acidobacteriota	Subgroup_18	Subgroup_18	Subgroup_18	Subgroup_18	436	41	299	367	9	347	95	432	194	612	598
OTU_692	Bacteria	Planctomycetota	Phycisphaerae	Phycisphaerales	AKAU3564_sediment_group	AKAU3564_sediment_group	0	0	0	0	38	3	5	5	0	0	0
OTU_694	Bacteria	Firmicutes	Clostridia	Clostridiales	Clostridiaceae	-	0	0	0	0	0	10	14	0	0	0	0
OTU_695	Bacteria	Firmicutes	Bacilli	Bacillales	Planococcaceae	Sporosarcina	0	0	0	0	0	6	24	0	0	0	0
OTU_696	Bacteria	Patescibacteria	Saccharimonadia	Saccharimonadales	LWQ8	-	0	0	0	0	0	0	0	2	0	0	0
OTU_698	Bacteria	Firmicutes	uncultured	uncultured	uncultured	uncultured	0	0	0	0	0	12	0	0	0	0	0
OTU_699	Bacteria	Bacteroidota	Bacteroidia	Bacteroidales	Marinilabiliaceae	uncultured	0	0	0	21	0	0	9	20	22	8	15
OTU_7	Bacteria	Firmicutes	Clostridia	Oscillospirales	[Eubacterium]_coprostanoligenes_group	[Eubacterium]_coprostanoligenes_group	7479	19150	18523	4619	2883	9780	5903	13394	17389	18971	8350
OTU_70	Bacteria	Firmicutes	Bacilli	Lactobacillales	Streptococcaceae	Lactovum	432	126	36	0	17	0	229	402	59	0	0
OTU_700	Bacteria	Planctomycetota	Planctomycetes	Gemmatales	Gemmataceae	-	0	0	14	11	28	83	0	2	0	0	0
OTU_701	Bacteria	Firmicutes	Dethiobacteria	Dethiobacterales	Dethiobacteraceae	Dethiobacter	0	0	0	410	0	0	0	0	0	0	0
OTU_702	Bacteria	Chloroflexi	AD3	-	-	-	0	0	0	12	0	272	123	0	0	0	0
OTU_703	Bacteria	Verrucomicrobiota	Chlamydiae	Chlamydiales	Parachlamydiaceae	Neochlamydia	0	0	4	0	0	0	0	3	0	0	0
OTU_704	Bacteria	Firmicutes	Clostridia	Clostridiales	Clostridiaceae	Clostridium_sensu_stricto_3	0	6	0	0	0	0	8	6	0	0	0
OTU_705	Bacteria	Actinobacteriota	Actinobacteria	Pseudonocardiales	Pseudonocardiaceae	Actinophytocola	0	14	17	327	19	0	18	6	0	0	0
OTU_706	Bacteria	Cyanobacteria	Cyanobacteriia	Chloroplast	Chloroplast	Chloroplast	0	0	0	2	0	0	19	0	0	0	0
OTU_708	Bacteria	Proteobacteria	Gammaproteobacteria	Burkholderiales	Alcaligenaceae	Bordetella	0	0	0	0	17	0	9	0	134	86	144
OTU_709	Bacteria	Firmicutes	Clostridia	Lachnospirales	Lachnospiraceae	Anaerosporobacter	0	0	9	0	9	0	0	0	0	0	0
OTU_71	Bacteria	Spirochaetota	Spirochaetia	Spirochaetales	Spirochaetaceae	-	426	108	173	15	193	24	123	987	240	819	739
OTU_711	Bacteria	Proteobacteria	Alphaproteobacteria	Rhizobiales	Beijerinckiaceae	Bosea	0	3	0	32	6	0	0	0	0	0	0
OTU_713	Bacteria	Verrucomicrobiota	Chlamydiae	Chlamydiales	-	-	0	0	0	17	0	0	0	0	0	0	0
OTU_715	Bacteria	Proteobacteria	Gammaproteobacteria	Gammaproteobacteria_Incertae_Sedis	Unknown_Family	Candidatus_Ovatusbacter	0	0	2	0	0	2	0	0	0	0	0
OTU_716	Bacteria	Elusimicrobiota	Elusimicrobia	Elusimicrobiales	Elusimicrobiaceae	Elusimicrobium	0	0	105	0	3	0	21	0	0	0	0
OTU_717	Bacteria	Proteobacteria	Gammaproteobacteria	Burkholderiales	Oxalobacteraceae	uncultured	0	0	0	0	9	0	22	98	32	87	112
OTU_718	Bacteria	Firmicutes	Clostridia	Oscillospirales	Ethanoligenenaceae	Incertae_Sedis	0	0	7	0	12	0	4	0	0	0	13
OTU_72	Bacteria	Firmicutes	uncultured	uncultured	uncultured	uncultured	420	136	131	85	0	39	481	255	283	275	707
OTU_720	Bacteria	Bacteroidota	Bacteroidia	Chitinophagales	Chitinophagaceae	uncultured	0	5	6	3	0	0	0	0	0	0	0
OTU_721	Bacteria	Planctomycetota	vadinHA49	-	-	-	0	0	0	0	0	8	0	0	0	0	0
OTU_722	Bacteria	Actinobacteriota	Thermoleophilia	Gaiellales	Gaiellaceae	Gaiella	0	15	0	39	52	235	0	0	0	0	0
OTU_724	Bacteria	Planctomycetota	Phycisphaerae	Tepidisphaerales	WD2101_soil_group	-	0	0	0	0	0	13	0	0	0	0	0
OTU_725	Bacteria	Firmicutes	Clostridia	Oscillospirales	[Clostridium]_methylpentosum_group	[Clostridium]_methylpentosum_group	0	26	0	11	0	0	0	6	5	0	5
OTU_726	Bacteria	Planctomycetota	Planctomycetes	Planctomycetales	uncultured	uncultured	0	4	12	10	0	8	0	7	7	0	0
OTU_728	Bacteria	Bacteroidota	Bacteroidia	Bacteroidales	Paludibacteraceae	uncultured	0	0	0	5	0	11	0	18	0	0	0
OTU_729	Bacteria	Firmicutes	Desulfotomaculia	Desulfotomaculales	Desulfallas-Sporotomaculum	Desulfallas-Sporotomaculum	0	145	0	0	36	0	0	8	0	0	0
OTU_73	Bacteria	Firmicutes	Clostridia	Oscillospirales	Oscillospiraceae	NK4A214_group	418	1147	436	214	270	804	468	335	274	300	411
OTU_731	Bacteria	Actinobacteriota	Actinobacteria	Frankiales	Frankiaceae	Frankia	0	0	0	17	8	96	0	0	0	0	0
OTU_733	Bacteria	Firmicutes	Clostridia	Clostridia_vadinBB60_group	Clostridia_vadinBB60_group	Clostridia_vadinBB60_group	0	0	7	0	0	0	7	0	34	22	30
OTU_735	Bacteria	Actinobacteriota	Acidimicrobiia	Microtrichales	Ilumatobacteraceae	uncultured	0	24	17	83	34	106	12	5	0	0	0
OTU_737	Bacteria	Planctomycetota	Planctomycetes	Isosphaerales	Isosphaeraceae	Aquisphaera	0	0	0	0	0	0	0	0	0	9	5
OTU_738	Bacteria	Proteobacteria	Alphaproteobacteria	Reyranellales	Reyranellaceae	Reyranella	0	0	6	15	18	33	0	0	0	0	0
OTU_74	Bacteria	Firmicutes	Clostridia	Lachnospirales	Lachnospiraceae	Tyzzerella	406	1035	466	0	22	0	818	361	330	613	631
OTU_740	Bacteria	Firmicutes	Desulfitobacteriia	Desulfitobacteriales	-	-	0	51	8	12	0	51	17	14	40	35	10
OTU_742	Bacteria	Firmicutes	Bacilli	Lactobacillales	-	-	0	0	0	297	0	0	0	0	0	0	0
OTU_743	Bacteria	Proteobacteria	Alphaproteobacteria	Rhizobiales	Devosiaceae	Devosia	0	0	0	29	0	0	15	0	0	0	0
OTU_745	Bacteria	Firmicutes	Bacilli	Bacillales	Bacillaceae	-	0	0	0	16	0	0	46	0	0	0	0
OTU_746	Bacteria	Firmicutes	Clostridia	Clostridiales	Clostridiaceae	Clostridium_sensu_stricto_16	0	0	0	0	290	0	0	0	0	0	0
OTU_747	Bacteria	Firmicutes	Clostridia	Monoglobales	Monoglobaceae	Monoglobus	0	22	31	0	4	56	0	14	19	0	0
OTU_748	Bacteria	Firmicutes	Clostridia	Clostridia	-	-	0	0	0	0	0	100	23	0	0	0	0
OTU_749	Bacteria	Firmicutes	Clostridia	Clostridiales	Clostridiaceae	Clostridium_sensu_stricto_12	0	0	0	0	0	6	0	0	0	0	0
OTU_75	Bacteria	Firmicutes	Clostridia	Oscillospirales	[Eubacterium]_coprostanoligenes_group	[Eubacterium]_coprostanoligenes_group	390	1155	625	322	249	401	699	655	643	294	341
OTU_750	Bacteria	Bacteroidota	Bacteroidia	Flavobacteriales	Weeksellaceae	Elizabethkingia	0	0	0	0	0	0	0	0	291	0	0
OTU_751	Bacteria	Firmicutes	Bacilli	Bacillales	Planococcaceae	Solibacillus	0	0	0	0	0	0	132	0	0	0	0
OTU_752	Bacteria	Planctomycetota	Planctomycetes	Planctomycetales	uncultured	uncultured	0	2	5	7	0	7	0	0	0	0	0
OTU_754	Bacteria	Proteobacteria	Alphaproteobacteria	Rhizobiales	Rhizobiaceae	Mesorhizobium	0	0	32	0	5	7	0	0	19	0	0
OTU_755	Bacteria	Elusimicrobiota	Elusimicrobia	Elusimicrobiales	Elusimicrobiaceae	Elusimicrobium	0	0	6	0	0	0	0	7	17	3	3
OTU_756	Bacteria	Fibrobacterota	Fibrobacteria	Fibrobacterales	Fibrobacteraceae	possible_genus_05	0	0	0	0	0	0	0	35	0	211	31
OTU_758	Bacteria	Actinobacteriota	Actinobacteria	Streptosporangiales	Streptosporangiaceae	-	0	0	0	30	5	236	0	0	2	0	0
OTU_76	Bacteria	Firmicutes	Clostridia	Peptostreptococcales-Tissierellales	Anaerovoracaceae	[Eubacterium]_brachy_group	390	104	13	32	15	209	13	50	49	42	0
OTU_762	Bacteria	Proteobacteria	Gammaproteobacteria	Diplorickettsiales	Diplorickettsiaceae	uncultured	0	4	0	0	5	0	0	0	0	0	0
OTU_763	Bacteria	Bacteroidota	Bacteroidia	Bacteroidales	Dysgonomonadaceae	Candidatus_Symbiothrix	0	0	80	0	0	0	30	10	84	27	32
OTU_766	Bacteria	Planctomycetota	Planctomycetes	Planctomycetales	uncultured	uncultured	0	0	10	0	0	0	0	0	0	0	0
OTU_768	Bacteria	Spirochaetota	Spirochaetia	Spirochaetales	Spirochaetaceae	M2PT2-76_termite_group	0	0	0	0	0	0	0	12	17	10	208
OTU_769	Bacteria	Acidobacteriota	Acidobacteriae	Subgroup_2	Subgroup_2	Subgroup_2	0	3	0	0	0	0	0	0	0	0	0
OTU_77	Bacteria	Firmicutes	Clostridia	Oscillospirales	Ruminococcaceae	Candidatus_Soleaferrea	373	215	14	410	33	1046	72	35	99	42	49
OTU_770	Bacteria	Actinobacteriota	Actinobacteria	Streptosporangiales	Thermomonosporaceae	Actinomadura	0	24	0	0	97	114	8	9	0	0	0
OTU_773	Bacteria	Actinobacteriota	Actinobacteria	Propionibacteriales	Nocardioidaceae	Nocardioides	0	0	0	0	10	0	240	0	0	0	0
OTU_778	Bacteria	Verrucomicrobiota	Verrucomicrobiae	Chthoniobacterales	Xiphinematobacteraceae	Candidatus_Xiphinematobacter	0	8	3	0	3	40	0	50	6	15	0
OTU_779	Bacteria	Planctomycetota	Phycisphaerae	Tepidisphaerales	CPla-3_termite_group	CPla-3_termite_group	0	0	117	24	0	93	0	0	0	0	0
OTU_78	Bacteria	Bacteroidota	Bacteroidia	Bacteroidales	Dysgonomonadaceae	Candidatus_Symbiothrix	372	182	1451	235	94	179	334	488	865	248	954
OTU_780	Bacteria	Bacteroidota	Bacteroidia	Bacteroidales	Dysgonomonadaceae	Dysgonomonas	0	0	0	0	45	0	0	0	0	0	0
OTU_781	Bacteria	Chloroflexi	Ktedonobacteria	Ktedonobacterales	Ktedonobacteraceae	FCPS473	0	14	0	7	0	38	0	4	0	0	0
OTU_782	Bacteria	Firmicutes	Clostridia	Clostridiales	Caloramatoraceae	Fonticella	0	0	2	3	8	0	0	2	0	0	0
OTU_783	Bacteria	Firmicutes	Bacilli	Brevibacillales	Brevibacillaceae	Brevibacillus	0	11	0	12	12	62	7	0	0	0	0
OTU_785	Bacteria	Firmicutes	Bacilli	Paenibacillales	Paenibacillaceae	Paenibacillus	0	7	0	18	0	0	0	0	0	0	0
OTU_787	Bacteria	Actinobacteriota	Acidimicrobiia	Microtrichales	uncultured	uncultured	0	0	0	46	26	157	0	0	0	0	0
OTU_789	Bacteria	Actinobacteriota	Actinobacteria	Propionibacteriales	Nocardioidaceae	Actinopolymorpha	0	0	0	131	4	88	0	3	0	0	0
OTU_79	Bacteria	Firmicutes	Bacilli	Erysipelotrichales	Erysipelatoclostridiaceae	Erysipelatoclostridium	372	0	11	0	0	0	71	0	0	6	0
OTU_790	Bacteria	Actinobacteriota	Actinobacteria	Pseudonocardiales	Pseudonocardiaceae	Crossiella	0	6	3	43	10	24	0	0	0	0	0
OTU_794	Bacteria	Proteobacteria	Gammaproteobacteria	Burkholderiales	Burkholderiaceae	Burkholderia-Caballeronia-Paraburkholderia	0	0	0	0	3	0	0	0	0	0	0
OTU_795	Bacteria	Planctomycetota	Phycisphaerae	Tepidisphaerales	CPla-3_termite_group	CPla-3_termite_group	0	0	27	6	4	41	29	0	0	0	0
OTU_796	Bacteria	Firmicutes	Clostridia	Clostridiales	Clostridiaceae	Clostridium_sensu_stricto_18	0	0	0	0	185	0	0	0	0	0	0
OTU_797	Bacteria	Myxococcota	Polyangia	Haliangiales	Haliangiaceae	Haliangium	0	6	91	7	10	67	0	0	0	0	0
OTU_798	Bacteria	Chloroflexi	Ktedonobacteria	Ktedonobacterales	Ktedonobacteraceae	Ktedonobacter	0	12	16	119	0	42	13	18	0	0	0
OTU_8	Bacteria	Synergistota	Synergistia	Synergistales	Synergistaceae	uncultured	6986	9768	5489	11778	1910	8300	3197	6112	9263	8717	5187
OTU_80	Bacteria	Actinobacteriota	Coriobacteriia	OPB41	-	-	370	690	3210	1477	596	1139	2403	358	575	399	638
OTU_802	Bacteria	Proteobacteria	Gammaproteobacteria	Burkholderiales	A21b	-	0	0	0	0	0	215	0	0	0	0	0
OTU_804	Bacteria	Firmicutes	Bacilli	Thermoactinomycetales	Thermoactinomycetaceae	Shimazuella	0	19	44	51	0	58	6	18	0	0	0
OTU_806	Bacteria	Firmicutes	Clostridia	Clostridia	Hungateiclostridiaceae	Ruminiclostridium	0	0	0	11	0	0	0	0	0	0	0
OTU_808	Bacteria	Proteobacteria	Alphaproteobacteria	Sphingomonadales	Sphingomonadaceae	-	0	0	0	11	0	0	17	0	0	0	0
OTU_809	Bacteria	Proteobacteria	Alphaproteobacteria	Azospirillales	Inquilinaceae	Inquilinus	0	0	0	0	3	2	0	0	0	0	0
OTU_81	Bacteria	Actinobacteriota	Coriobacteriia	Coriobacteriales	uncultured	uncultured	362	130	0	6	44	0	45	12	7	17	90
OTU_810	Bacteria	Proteobacteria	Alphaproteobacteria	Paracaedibacterales	Paracaedibacteraceae	uncultured	0	76	26	6	0	7	0	9	0	12	24
OTU_814	Bacteria	Planctomycetota	Phycisphaerae	Phycisphaerales	AKAU3564_sediment_group	AKAU3564_sediment_group	0	0	0	38	8	9	14	0	3	22	3
OTU_815	Bacteria	Firmicutes	Clostridia	Clostridiales	Caloramatoraceae	-	0	0	0	0	0	0	14	0	0	0	0
OTU_818	Bacteria	Firmicutes	Bacilli	Paenibacillales	Paenibacillaceae	Paenibacillus	0	0	0	8	0	0	0	0	0	0	0
OTU_82	Bacteria	Bacteroidota	Bacteroidia	Bacteroidales	Williamwhitmaniaceae	Rs-D38_termite_group	349	122	64	0	0	0	169	223	66	69	535
OTU_820	Bacteria	Firmicutes	Bacilli	Bacillales	Planococcaceae	Rummeliibacillus	0	0	0	0	0	0	8	0	0	0	0
OTU_821	Bacteria	Bdellovibrionota	Oligoflexia	Oligoflexales	uncultured	uncultured	0	0	138	0	0	0	5	0	24	31	0
OTU_823	Bacteria	Actinobacteriota	Actinobacteria	Micrococcales	Dermacoccaceae	-	0	15	0	0	0	0	7	8	0	27	0
OTU_824	Bacteria	Actinobacteriota	Actinobacteria	Propionibacteriales	Nocardioidaceae	Nocardioides	0	18	73	10	0	0	52	42	0	0	0
OTU_825	Bacteria	Proteobacteria	Gammaproteobacteria	Burkholderiales	Rhodocyclaceae	uncultured	0	0	0	0	0	0	126	34	0	13	21
OTU_826	Bacteria	Verrucomicrobiota	Verrucomicrobiae	Pedosphaerales	Pedosphaeraceae	Ellin516	0	0	0	10	0	0	0	0	0	0	0
OTU_83	Bacteria	Firmicutes	Clostridia	Peptostreptococcales-Tissierellales	Anaerovoracaceae	[Eubacterium]_brachy_group	341	354	29	67	131	110	0	53	17	125	311
OTU_831	Bacteria	Actinobacteriota	Thermoleophilia	Solirubrobacterales	Solirubrobacteraceae	Solirubrobacter	0	10	3	10	22	89	55	0	0	0	0
OTU_832	Bacteria	Firmicutes	Bacilli	Thermoactinomycetales	Thermoactinomycetaceae	Pasteuria	0	0	0	5	0	0	0	0	0	0	0
OTU_838	Bacteria	Firmicutes	Negativicutes	Veillonellales-Selenomonadales	Sporomusaceae	Dendrosporobacter	0	0	0	3	0	0	2	0	4	32	0
OTU_84	Bacteria	Bdellovibrionota	Bdellovibrionia	Bacteriovoracales	Bacteriovoracaceae	uncultured	340	84	19	2	14	12	7	12	2	77	27
OTU_840	Bacteria	Firmicutes	Clostridia	Clostridia	Gracilibacteraceae	Lutispora	0	0	0	0	0	0	0	2	0	0	0
OTU_841	Bacteria	SAR324_clade(Marine_group_B)	SAR324_clade(Marine_group_B)	SAR324_clade(Marine_group_B)	SAR324_clade(Marine_group_B)	-	0	0	5	0	0	4	10	0	0	9	16
OTU_842	Bacteria	Actinobacteriota	Actinobacteria	Pseudonocardiales	Pseudonocardiaceae	Actinopolyspora	0	2	2	50	0	122	6	0	0	0	0
OTU_847	Bacteria	Firmicutes	Bacilli	Brevibacillales	Brevibacillaceae	Brevibacillus	0	5	0	0	0	0	0	0	0	0	0
OTU_848	Bacteria	Actinobacteriota	Actinobacteria	Micrococcales	Micrococcaceae	Paenarthrobacter	0	0	6	0	127	0	0	0	0	0	0
OTU_85	Bacteria	Firmicutes	Clostridia	Oscillospirales	-	-	339	1559	754	1729	526	3763	1634	634	900	811	1549
OTU_850	Bacteria	Firmicutes	Clostridia	Clostridia	Hungateiclostridiaceae	Anaerobacterium	0	0	0	7	0	0	0	0	0	0	0
OTU_851	Bacteria	Acidobacteriota	Vicinamibacteria	Vicinamibacterales	uncultured	uncultured	0	0	0	0	15	15	0	0	0	0	5
OTU_852	Bacteria	Myxococcota	Myxococcia	Myxococcales	Myxococcaceae	P3OB-42	0	0	0	0	0	0	0	0	12	45	0
OTU_853	Bacteria	Desulfobacterota	Desulfovibrionia	Desulfovibrionales	Desulfovibrionaceae	Desulfovibrio	0	0	32	136	0	0	0	0	0	6	0
OTU_854	Bacteria	Actinobacteriota	Actinobacteria	Corynebacteriales	Tsukamurellaceae	Tsukamurella	0	0	0	9	0	0	5	0	0	0	0
OTU_856	Bacteria	Actinobacteriota	Actinobacteria	Micrococcales	Microbacteriaceae	Humibacter	0	0	0	0	0	0	7	0	0	0	0
OTU_86	Bacteria	Firmicutes	uncultured	uncultured	uncultured	uncultured	338	347	226	57	51	1767	311	113	249	280	381
OTU_861	Bacteria	Proteobacteria	Alphaproteobacteria	Rhizobiales	Xanthobacteraceae	Pseudolabrys	0	0	0	23	0	0	0	0	0	0	0
OTU_864	Bacteria	Firmicutes	Bacilli	Bacillales	Bacillaceae	Bacillus	0	0	0	0	0	67	33	0	0	0	0
OTU_867	Bacteria	Actinobacteriota	Thermoleophilia	Solirubrobacterales	-	-	0	0	16	39	17	78	6	0	0	0	0
OTU_868	Bacteria	Firmicutes	Bacilli	Lactobacillales	Lactobacillaceae	Lactobacillus	0	13	0	0	0	0	0	0	0	0	0
OTU_869	Bacteria	Proteobacteria	Alphaproteobacteria	Rhodospirillales	uncultured	uncultured	0	0	2	0	0	6	6	0	0	52	0
OTU_87	Bacteria	Firmicutes	Bacilli	Erysipelotrichales	Erysipelotrichaceae	uncultured	317	164	112	70	50	0	206	57	53	27	73
OTU_870	Bacteria	Elusimicrobiota	Endomicrobia	Endomicrobiales	Endomicrobiaceae	Endomicrobium	0	3	13	0	8	0	0	0	0	28	0
OTU_872	Bacteria	Verrucomicrobiota	Verrucomicrobiae	Pedosphaerales	Pedosphaeraceae	Pedosphaera	0	0	0	0	0	8	0	0	0	0	0
OTU_878	Bacteria	Proteobacteria	Alphaproteobacteria	Rhizobiales	Methyloligellaceae	Methyloligellaceae	0	0	0	0	0	9	0	0	0	0	0
OTU_879	Bacteria	Actinobacteriota	Coriobacteriia	OPB41	-	-	0	0	20	5	2	76	16	13	0	5	10
OTU_88	Bacteria	Firmicutes	Clostridia	Clostridia_vadinBB60_group	Clostridia_vadinBB60_group	Clostridia_vadinBB60_group	311	215	162	330	88	23	129	164	278	220	259
OTU_880	Bacteria	Chloroflexi	TK10	-	-	-	0	0	0	19	39	77	0	7	0	0	0
OTU_882	Bacteria	Firmicutes	Clostridia	Clostridia	Hungateiclostridiaceae	uncultured	0	110	6	0	0	0	2	24	0	0	0
OTU_883	Bacteria	Chloroflexi	KD4-96	-	-	-	0	0	0	0	6	0	0	0	0	0	0
OTU_884	Bacteria	Actinobacteriota	Actinobacteria	Micromonosporales	Micromonosporaceae	Actinocatenispora	0	0	0	0	0	0	144	0	0	0	0
OTU_885	Bacteria	Firmicutes	Bacilli	Paenibacillales	Paenibacillaceae	Paenibacillus	0	0	0	9	0	0	0	0	0	0	0
OTU_886	Bacteria	Proteobacteria	Gammaproteobacteria	Xanthomonadales	Xanthomonadaceae	Pseudoxanthomonas	0	6	0	68	4	0	0	0	0	0	0
OTU_888	Bacteria	Proteobacteria	Alphaproteobacteria	Rickettsiales	Mitochondria	Mitochondria	0	0	0	0	0	0	13	0	0	0	3
OTU_889	Bacteria	Methylomirabilota	Methylomirabilia	Rokubacteriales	Rokubacteriales	Rokubacteriales	0	11	25	11	17	78	0	0	0	0	0
OTU_89	Bacteria	Firmicutes	Clostridia	Oscillospirales	Ruminococcaceae	uncultured	308	1607	1217	1811	492	4306	1244	719	992	638	873
OTU_890	Bacteria	Hydrogenedentes	Hydrogenedentia	Hydrogenedentiales	Hydrogenedensaceae	Hydrogenedensaceae	0	7	21	11	3	0	17	14	55	14	0
OTU_891	Bacteria	Actinobacteriota	Actinobacteria	Corynebacteriales	Nocardiaceae	Rhodococcus	0	33	0	29	0	0	9	0	0	0	0
OTU_892	Bacteria	Firmicutes	Bacilli	Paenibacillales	Paenibacillaceae	Paenibacillus	0	9	0	0	0	0	5	11	0	0	0
OTU_895	Bacteria	Firmicutes	Clostridia	Clostridiales	Clostridiaceae	Clostridium_sensu_stricto_11	0	0	0	0	0	0	7	0	0	0	9
OTU_896	Bacteria	Firmicutes	Clostridia	Christensenellales	Christensenellaceae	Christensenellaceae_R-7_group	0	0	0	0	0	59	0	0	0	0	0
OTU_897	Bacteria	Firmicutes	Clostridia	uncultured	uncultured	uncultured	0	17	0	18	4	40	14	0	11	2	0
OTU_898	Bacteria	Actinobacteriota	Acidimicrobiia	Microtrichales	uncultured	uncultured	0	14	9	23	14	0	9	0	0	0	0
OTU_899	Bacteria	Firmicutes	Limnochordia	Limnochordia	Limnochordia	Hydrogenispora	0	0	0	5	0	0	0	0	0	0	0
OTU_9	Bacteria	Firmicutes	Clostridia	Oscillospirales	Ruminococcaceae	-	6116	1659	194	717	374	1680	745	537	669	1190	2638
OTU_90	Bacteria	Desulfobacterota	Desulfobulbia	Desulfobulbales	Desulfobulbaceae	Desulfobulbus	297	2311	2	276	189	0	17	203	0	0	3
OTU_902	Bacteria	Proteobacteria	Gammaproteobacteria	CCD24	-	-	0	9	0	0	0	16	0	0	0	0	0
OTU_903	Bacteria	Actinobacteriota	Actinobacteria	Catenulisporales	Catenulisporaceae	Catenulispora	0	0	0	0	0	13	0	0	0	0	0
OTU_906	Bacteria	Proteobacteria	Gammaproteobacteria	Burkholderiales	Oxalobacteraceae	Noviherbaspirillum	0	4	6	37	0	0	0	0	0	0	0
OTU_907	Bacteria	Actinobacteriota	Actinobacteria	Corynebacteriales	Nocardiaceae	Smaragdicoccus	0	0	37	19	0	65	7	0	0	0	0
OTU_91	Bacteria	Firmicutes	Clostridia	Clostridia	Hungateiclostridiaceae	uncultured	296	45	18	33	12	365	53	35	23	115	25
OTU_912	Bacteria	Bacteroidota	Bacteroidia	Bacteroidales	Rikenellaceae	-	0	0	76	0	0	0	0	0	32	6	7
OTU_913	Bacteria	Firmicutes	Bacilli	Paenibacillales	Paenibacillaceae	Paenibacillus	0	9	0	77	0	0	0	0	0	0	0
OTU_915	Bacteria	Actinobacteriota	Actinobacteria	Frankiales	Geodermatophilaceae	Geodermatophilus	0	0	0	0	0	8	114	0	0	0	0
OTU_917	Bacteria	Firmicutes	Clostridia	Peptostreptococcales-Tissierellales	Peptostreptococcaceae	Clostridioides	0	0	0	0	113	0	0	0	0	0	0
OTU_92	Bacteria	Firmicutes	Clostridia	Christensenellales	Christensenellaceae	-	292	546	117	522	371	1470	204	75	147	170	154
OTU_921	Bacteria	Spirochaetota	Spirochaetia	Spirochaetales	Spirochaetaceae	Treponema	0	0	0	0	0	0	0	0	30	70	19
OTU_922	Bacteria	Spirochaetota	Spirochaetia	Spirochaetales	Spirochaetaceae	Termite_Treponema_cluster	0	0	0	0	0	0	6	45	37	7	21
OTU_923	Bacteria	Firmicutes	Clostridia	Oscillospirales	Oscillospiraceae	Intestinimonas	0	0	0	0	0	8	0	0	0	0	0
OTU_925	Bacteria	Firmicutes	Clostridia	Oscillospirales	Ruminococcaceae	Candidatus_Soleaferrea	0	4	2	0	8	0	0	0	0	0	0
OTU_926	Bacteria	Firmicutes	Clostridia	Peptococcales	Peptococcaceae	uncultured	0	0	0	0	0	113	0	0	0	0	0
OTU_929	Bacteria	Myxococcota	Polyangia	-	-	-	0	0	94	0	0	11	0	0	0	0	0
OTU_93	Bacteria	Bacteroidota	Bacteroidia	Bacteroidales	Paludibacteraceae	-	289	75	345	0	28	22	186	210	438	262	503
OTU_932	Bacteria	Actinobacteriota	Actinobacteria	Pseudonocardiales	Pseudonocardiaceae	Actinomycetospora	0	0	0	0	26	0	0	0	10	0	0
OTU_934	Bacteria	Firmicutes	Bacilli	Paenibacillales	Paenibacillaceae	Paenibacillus	0	0	0	0	0	9	0	0	0	0	0
OTU_937	Bacteria	Actinobacteriota	Actinobacteria	Corynebacteriales	-	-	0	0	0	9	0	100	0	0	0	0	0
OTU_938	Bacteria	Firmicutes	Clostridia	Peptostreptococcales-Tissierellales	Peptostreptococcaceae	-	0	0	0	0	4	0	10	0	0	0	0
OTU_939	Bacteria	Actinobacteriota	Actinobacteria	Propionibacteriales	Propionibacteriaceae	-	0	0	0	0	0	0	5	0	0	0	4
OTU_94	Bacteria	Bacteroidota	Bacteroidia	Bacteroidales	Paludibacteraceae	uncultured	244	153	667	265	202	781	309	548	519	922	762
OTU_940	Bacteria	Proteobacteria	Alphaproteobacteria	Rhizobiales	Beijerinckiaceae	Microvirga	0	0	0	49	19	11	0	6	0	0	0
OTU_941	Bacteria	Firmicutes	Clostridia	Lachnospirales	Lachnospiraceae	Lachnotalea	0	30	0	7	0	0	0	0	0	0	0
OTU_942	Bacteria	Bacteroidota	Bacteroidia	Chitinophagales	Chitinophagaceae	Sediminibacterium	0	0	0	0	0	0	0	0	46	13	43
OTU_946	Bacteria	Firmicutes	Clostridia	Clostridia_vadinBB60_group	Clostridia_vadinBB60_group	Clostridia_vadinBB60_group	0	0	0	0	0	0	0	0	63	9	0
OTU_947	Bacteria	Firmicutes	Clostridia	Oscillospirales	[Clostridium]_methylpentosum_group	[Clostridium]_methylpentosum_group	0	36	2	0	0	0	0	0	0	0	0
OTU_95	Bacteria	Cloacimonadota	Cloacimonadia	Cloacimonadales	CW-1_termite_group	CW-1_termite_group	238	12	4	0	2	0	4	2	16	15	47
OTU_950	Bacteria	Bdellovibrionota	Oligoflexia	0319-6G20	-	-	0	0	0	8	0	0	0	0	0	0	0
OTU_952	Bacteria	Proteobacteria	Alphaproteobacteria	uncultured	uncultured	uncultured	0	0	2	0	3	10	0	2	0	0	0
OTU_954	Bacteria	Firmicutes	Bacilli	Thermoactinomycetales	Thermoactinomycetaceae	Shimazuella	0	11	0	20	6	48	0	11	0	0	7
OTU_955	Bacteria	Actinobacteriota	Actinobacteria	Micromonosporales	Micromonosporaceae	Luedemannella	0	0	0	40	0	61	0	0	0	0	0
OTU_958	Bacteria	Actinobacteriota	Actinobacteria	Micrococcales	Micrococcaceae	Pseudarthrobacter	0	11	0	0	12	0	0	6	10	0	10
OTU_96	Bacteria	Firmicutes	Clostridia	Clostridiales	Clostridiaceae	Clostridium_sensu_stricto_1	229	530	177	104	399	63	416	178	66	11	235
OTU_962	Bacteria	Planctomycetota	Planctomycetes	Pirellulales	Pirellulaceae	Pirellula	0	0	22	4	10	9	0	3	0	0	0
OTU_963	Bacteria	Bdellovibrionota	Oligoflexia	0319-6G20	-	-	0	0	0	3	0	0	0	0	0	0	0
OTU_964	Bacteria	Firmicutes	Clostridia	Peptococcales	Peptococcaceae	uncultured	0	66	0	0	19	0	0	13	0	0	0
OTU_965	Bacteria	Spirochaetota	Leptospirae	Leptospirales	Leptospiraceae	RBG-16-49-21	0	0	0	0	0	97	0	0	0	0	0
OTU_966	Bacteria	Proteobacteria	Gammaproteobacteria	Burkholderiales	Oxalobacteraceae	Oxalobacter	0	0	7	0	0	0	0	45	7	0	0
OTU_969	Bacteria	Firmicutes	Bacilli	Bacillales	Bacillaceae	Bacillus	0	0	0	0	0	7	0	0	0	0	0
OTU_97	Bacteria	Firmicutes	Clostridia	Oscillospirales	Ruminococcaceae	Ruminococcaceae	222	139	0	6	40	12	0	10	0	0	0
OTU_976	Bacteria	Actinobacteriota	MB-A2-108	-	-	-	0	0	4	17	8	63	0	0	0	0	0
OTU_977	Bacteria	Chloroflexi	Ktedonobacteria	Ktedonobacterales	Ktedonobacteraceae	uncultured	0	0	0	48	11	0	0	7	9	4	0
OTU_978	Bacteria	Firmicutes	Bacilli	Bacillales	Bacillaceae	Bacillus	0	0	0	8	0	46	38	0	0	0	0
OTU_98	Bacteria	Bacteroidota	Bacteroidia	Bacteroidales	Dysgonomonadaceae	-	219	414	583	35	99	22	261	198	293	273	1289
OTU_981	Bacteria	Acidobacteriota	Acidobacteriae	Acidobacteriales	Koribacteraceae	Candidatus_Koribacter	0	0	0	0	0	58	0	2	0	0	0
OTU_982	Bacteria	Firmicutes	Clostridia	Clostridiales	Clostridiaceae	Clostridium_sensu_stricto_8	0	0	7	0	4	29	0	0	0	0	0
OTU_984	Bacteria	Firmicutes	Clostridia	Oscillospirales	[Eubacterium]_coprostanoligenes_group	[Eubacterium]_coprostanoligenes_group	0	0	0	0	0	0	8	8	4	0	9
OTU_986	Bacteria	Actinobacteriota	Actinobacteria	Micrococcales	Promicromonosporaceae	Isoptericola	0	13	0	76	0	0	0	0	0	0	0
OTU_987	Bacteria	Myxococcota	Polyangia	Polyangiales	Sandaracinaceae	uncultured	0	2	66	4	2	15	0	0	0	0	0
OTU_988	Bacteria	Chloroflexi	KD4-96	-	-	-	0	0	14	16	11	30	0	6	0	0	0
OTU_99	Bacteria	Actinobacteriota	Actinobacteria	Micrococcales	Micrococcaceae	-	218	8127	2173	7	6833	0	6692	5385	5510	1500	809
OTU_992	Bacteria	Firmicutes	Clostridia	Peptostreptococcales-Tissierellales	Anaerovoracaceae	[Eubacterium]_nodatum_group	0	0	88	0	0	0	0	0	0	0	0
OTU_993	Bacteria	Firmicutes	Bacilli	Paenibacillales	Paenibacillaceae	Cohnella	0	10	0	53	0	24	0	0	0	0	0
OTU_995	Bacteria	Myxococcota	Myxococcia	Myxococcales	Myxococcaceae	uncultured	0	12	0	0	0	0	0	0	0	0	0
OTU_996	Bacteria	Spirochaetota	Spirochaetia	Spirochaetales	Spirochaetaceae	Spirochaeta	0	0	0	0	0	0	0	0	6	18	2
OTU_997	Bacteria	Actinobacteriota	Actinobacteria	Micrococcales	Microbacteriaceae	Agromyces	0	0	0	9	0	0	0	0	0	0	0
OTU_999	Bacteria	Firmicutes	Bacilli	Erysipelotrichales	Erysipelotrichaceae	-	0	0	0	70	0	0	0	0	0	0	0
